# Supplementary material for: UV-B Irradiation Changes Specifically the Secondary Metabolite Profile in Broccoli Sprouts: Induced Signaling Overlaps with Defense Response to Biotic Stressors
Source: PubMed Central journal article supplement — Plant Cell Physiol. 2012 Jul 5;53(9):1546–60. doi: 10.1093/pcp/pcs096 (PMC3439869; doi:10.1093/pcp/pcs096), 2012-07-05
Supplement: supp_pcs096_pcp-2012-e-00197-File006.pdf [file supp_pcs096_pcp-2012-e-00197-File006.pdf]

Suppl. Table 1

| Identifier | UV-control | Induced - Description                                                                                                                                           |
|------------|------------|-----------------------------------------------------------------------------------------------------------------------------------------------------------------|
| EV108519   | 5.153      | moderately similar to (278)AT1G10340   Symbols:   ankyrin repeat family protein                                                                                 |
| JCVI_40837 | 4.852      | very weakly similar to (91.7)AT2G14610   Symbols: PR-1, PR1   PR1 (PATHOGENESIS-RELATED GENE 1)                                                                 |
| JCVI_20479 | 4.728      | moderately similar to (328)AT1G64970   Symbols: TMT1, VTE4, G-TMT   G-TMT (GAMMA-TOCOPHEROL METHYLTRANSFERASE)                                                  |
| JCVI_33787 | 4.625      | moderately similar to (320)AT3G11340   Symbols:   UDP-glucuronosyl/UDP-glucosyl transferase family protein                                                      |
| JCVI_24991 | 4.308      | moderately similar to (372)AT3G57260   Symbols: PR2, BG2, PR-2, BGL2   glucan 1,3-beta-glucosidase/ hydrolase, hydrolyzing O-glycosyl compounds                 |
| AI352858   | 4.302      | weakly similar to (112)AT2G14610   Symbols: PR-1, PR1   PR1 (PATHOGENESIS-RELATED GENE 1)                                                                       |
| JCVI_26210 | 4.134      | moderately similar to (333)AT1G14040   Symbols:   ATP binding / ATPase, coupled to transmembrane movement of substances                                         |
| JCVI_37786 | 4.086      | -                                                                                                                                                               |
| EV146444   | 4.058      | -                                                                                                                                                               |
| JCVI_16762 | 3.991      | moderately similar to (348)AT3G13080   Symbols: EST2, MRP3, ATM3P3   ATM3P3 (Arabidopsis thaliana multidrug resistance-associated protein 3)                    |
| JCVI_19327 | 3.813      | moderately similar to (490)AT3G57240   Symbols: BG3   BG3 (BETA-1,3-GLUCANASE 3); hydrolase, hydrolyzing O-glycosyl compounds                                   |
| JCVI_9816  | 3.812      | very weakly similar to (100)AT2G47520   Symbols:   AP2 domain-containing transcription factor, putative                                                         |
| JCVI_291   | 3.767      | moderately similar to (276)AT4G11650   Symbols: ATOSM34   ATOSM34 (OSMOTIN 34)                                                                                  |
| DN963737   | 3.668      | -                                                                                                                                                               |
| EV116790   | 3.642      | moderately similar to (304)AT5G13320   Symbols: GGD1, WIN3, PBS3   PBS3 (AVRPPHB SUSCEPTIBLE 3)                                                                 |
| EV197431   | 3.612      | -                                                                                                                                                               |
| JCVI_9951  | 3.561      | moderately similar to (255)AT3G60140   Symbols: SRG2, DIN2   DIN2 (DARK INDUCIBLE 2); hydrolase, hydrolyzing O-glycosyl compounds                               |
| H07446     | 3.525      | -                                                                                                                                                               |
| EV108419   | 3.457      | very weakly similar to (81.3)AT3G60140   Symbols: SRG2, DIN2   DIN2 (DARK INDUCIBLE 2); hydrolase, hydrolyzing O-glycosyl compounds                             |
| JCVI_35049 | 3.450      | weakly similar to (154)AT4G34135   Symbols: UGT73B2   UGT73B2; UDP-glycosyltransferase (flavonol 3-O-glucosyltransferase activity)                              |
| JCVI_15239 | 3.404      | moderately similar to (298)AT1G19320   Symbols:   pathogenesis-related thaumatin family protein                                                                 |
| JCVI_5125  | 3.375      | moderately similar to (300)AT2G16060   Symbols: ARATH GLB1, GLB1, NSHB1, ATGLB1, AHB1   AHB1 (ARABIDOPSIS HEMOGLOBIN 1)                                         |
| EE422466   | 3.369      | -                                                                                                                                                               |
| JCVI_18994 | 3.296      | moderately similar to (394)AT2G43570   Symbols:   chitinase, putative                                                                                           |
| JCVI_9441  | 3.278      | moderately similar to (455)AT3G57260   Symbols: PR2, BG2, PR-2, BGL2   glucan 1,3-beta-glucosidase/ hydrolase, hydrolyzing O-glycosyl compounds                 |
| EV108922   | 3.262      | moderately similar to (307)AT1G10340   Symbols:   ankyrin repeat family protein                                                                                 |
| DY027083   | 3.248      | -                                                                                                                                                               |
| JCVI_29399 | 3.244      | -                                                                                                                                                               |
| JCVI_12816 | 3.228      | -                                                                                                                                                               |
| JCVI_18272 | 3.201      | -                                                                                                                                                               |
| JCVI_8263  | 3.147      | moderately similar to (475)AT2G43000   Symbols: ANAC042   ANAC042 (Arabidopsis NAC domain containing protein 42); transcription factor                          |
| EE444296   | 3.099      | weakly similar to (175)AT1G45145   Symbols: ATH5, LIV1, ATTRX5   ATTRX5 (thioredoxin H-type 5); thiol-disulfide exchange intermediate                           |
| JCVI_29699 | 3.072      | -                                                                                                                                                               |
| H07467     | 3.070      | -                                                                                                                                                               |
| JCVI_12718 | 3.066      | -                                                                                                                                                               |
| JCVI_39172 | 3.038      | -                                                                                                                                                               |
| JCVI_35251 | 2.994      | moderately similar to (490)AT1G03790   Symbols:   zinc finger (CCCH-type) family protein                                                                        |
| JCVI_40707 | 2.973      | weakly similar to (147)AT3G25882   Symbols: NIMIN-2   NIMIN-2 (NIM1-INTERACTING 2)                                                                              |
| JCVI_18478 | 2.946      | moderately similar to (400)AT1G53990   Symbols: GLIP3   GLIP3 (GDSL-motif lipase 3); carboxylesterase/ lipase                                                   |
| JCVI_16583 | 2.926      | weakly similar to (128)AT3G04720   Symbols: HEL, PR-4, PR4   PR4 (PATHOGENESIS-RELATED 4)                                                                       |
| EE518139   | 2.918      | weakly similar to (195)AT2G20800   Symbols: NDB4   NDB4 (NAD(P)H DEHYDROGENASE B4); NADH dehydrogenase                                                          |
| EV108983   | 2.906      | weakly similar to (157)AT1G14080   Symbols: ATFUT6, FUT6   FUT6 (fucosyltransferase 6); fucosyltransferase/ transferase, transferring glycosyl groups           |
| JCVI_12338 | 2.887      | very weakly similar to (89.7)AT5G65207   Symbols:   similar to unknown protein [Arabidopsis thaliana] [AT5G10040.1]                                             |
| JCVI_7995  | 2.881      | moderately similar to (393)AT3G60140   Symbols: SRG2, DIN2   DIN2 (DARK INDUCIBLE 2); hydrolase, hydrolyzing O-glycosyl compounds                               |
| JCVI_40406 | 2.843      | moderately similar to (380)AT3G57260   Symbols: PR2, BG2, PR-2, BGL2   glucan 1,3-beta-glucosidase/ hydrolase, hydrolyzing O-glycosyl compounds                 |
| JCVI_15854 | 2.815      | weakly similar to (140)AT2G14610   Symbols: PR-1, PR1   PR1 (PATHOGENESIS-RELATED GENE 1)                                                                       |
| AM386985   | 2.788      | weakly similar to (127)AT5G37990   Symbols:   S-adenosylmethionine-dependent methyltransferase                                                                  |
| EE434928   | 2.786      | weakly similar to (174)AT1G76680   Symbols: OPR1   OPR1 (12-oxophytodienoate reductase 1); 12-oxophytodienoate reductase                                        |
| JCVI_5035  | 2.786      | moderately similar to (429)AT5G38100   Symbols:   methyltransferase-related                                                                                     |
| AM391914   | 2.785      | -                                                                                                                                                               |
| JCVI_8351  | 2.760      | moderately similar to (219)AT5G24530   Symbols:   oxidoreductase, 2OG-Fe(II) oxygenase family protein                                                           |
| JCVI_30    | 2.749      | moderately similar to (364)AT2G02930   Symbols: GST16, ATGSTF3   ATGSTF3 (GLUTATHIONE S-TRANSFERASE 16); glutathione transferase                                |
| EE561948   | 2.735      | weakly similar to (130)AT4G1730   Symbols:   similar to unknown protein [AT5G24640.1]                                                                           |
| CD824937   | 2.733      | weakly similar to (163)AT5G09680   Symbols:   cytochrome b5 domain-containing protein                                                                           |
| JCVI_33065 | 2.726      | weakly similar to (131)AT3G10040   Symbols:   transcription factor                                                                                              |
| JCVI_36664 | 2.721      | highly similar to (822)AT4G37370   Symbols: CYP81D8   CYP81D8 (cytochrome P450, family 81, subfamily D, polypeptide 8); oxygen binding                          |
| H07491     | 2.721      | -                                                                                                                                                               |
| JCVI_27712 | 2.720      | moderately similar to (298)AT3G55230   Symbols:   disease resistance-responsive family protein                                                                  |
| JCVI_13432 | 2.714      | moderately similar to (392)AT1G17180   Symbols: ATGSTU25   (Arabidopsis thaliana Glutathione S-transferase (class tau) 25); glutathione transferase             |
| JCVI_37398 | 2.708      | -                                                                                                                                                               |
| JCVI_5462  | 2.694      | weakly similar to (172)AT5G01750   Symbols:   Uncharacterized protein At5g01750; similar to unknown protein [AT3G11740.1]; DUF567 (InterPro:IPR007612)          |
| JCVI_11279 | 2.692      | moderately similar to (262)AT1G04350   Symbols:   2-oxoglutarate-dependent dioxygenase, putative   UV-B responsive                                              |
| JCVI_41553 | 2.684      | -                                                                                                                                                               |
| EE473027   | 2.669      | very weakly similar to (91.3)AT1G02450   Symbols: NIMIN-1, NIMIN-1   NIMIN-1/NIMIN1; protein binding                                                            |
| EV162033   | 2.648      | moderately similar to (217)AT1G75050   Symbols:   ATLP-3 (Thaumatococcus-like protein 3) [AT1G75030.1]; Thaumatococcus pathogenesis-related (InterPro:IPR01938) |
| JCVI_798   | 2.646      | moderately similar to (297)AT3G44840   Symbols:   S-adenosyl-L-methionine:carboxyl methyltransferase family protein                                             |
| EH418095   | 2.639      | moderately similar to (248)AT2G41790   Symbols:   peptidase M16 family protein / insulinase family protein                                                      |
| JCVI_12072 | 2.632      | highly similar to (613)AT3G27060   Symbols: TSO2   TSO2 (TSO MEANING 'UGLY' IN CHINESE); ribonucleoside-diphosphate reductase                                   |
| JCVI_8068  | 2.618      | weakly similar to (194)AT4G12480   Symbols: pEARLI 1   pEARLI 1; lipid binding                                                                                  |
| JCVI_8465  | 2.607      | moderately similar to (397)AT1G11330   Symbols:   S-locus lectin protein kinase family protein                                                                  |
| DV643299   | 2.581      | moderately similar to (463)AT3G60120   Symbols:   glycosyl hydrolase family 1 protein                                                                           |
| JCVI_27211 | 2.577      | highly similar to (692)AT5G67360   Symbols: ARA12   ARA12; subtilase                                                                                            |
| JCVI_794   | 2.567      | moderately similar to (398)AT4G02850   Symbols:   phenazine biosynthesis PhzC/PhzF family protein                                                               |
| JCVI_36377 | 2.564      | highly similar to (611)AT3G60120   Symbols:   glycosyl hydrolase family 1 protein                                                                               |
| EV224604   | 2.561      | -                                                                                                                                                               |
| JCVI_9165  | 2.560      | -                                                                                                                                                               |
| EV169895   | 2.550      | -                                                                                                                                                               |
| JCVI_24173 | 2.542      | highly similar to (774)AT3G60140   Symbols: SRG2, DIN2   DIN2 (DARK INDUCIBLE 2); hydrolase, hydrolyzing O-glycosyl compounds                                   |
| JCVI_36485 | 2.536      | moderately similar to (353)AT3G11340   Symbols:   UDP-glucuronosyl/UDP-glucosyl transferase family protein                                                      |
| JCVI_10776 | 2.535      | highly similar to (781)AT1G26420   Symbols:   FAD-binding domain-containing protein                                                                             |
| JCVI_35521 | 2.527      | moderately similar to (305)AT3G09270   Symbols: ATGSTU8   (Arabidopsis thaliana Glutathione S-transferase (class tau) 8); glutathione transferase               |
| JCVI_24772 | 2.520      | moderately similar to (227)AT2G16900   Symbols:   similar to unknown protein [AT4G35110.2]; InterPro domain Phospholipase-like (InterPro:IPR007942)             |
| EV227118   | 2.507      | weakly similar to (115)AT2G45220   Symbols:   pectinesterase family protein                                                                                     |
| JCVI_36804 | 2.499      | moderately similar to (285)AT4G31800   Symbols: WRKY18   WRKY18 (WRKY DNA-binding protein 18); transcription factor                                             |
| JCVI_27491 | 2.484      | moderately similar to (307)AT4G35180   Symbols: LHT7   LHT7 (LYS/HIS TRANSPORTER 7); amino acid transmembrane transporter                                       |
| JCVI_14946 | 2.478      | moderately similar to (356)AT3G07800   Symbols:   thymidine kinase, putative                                                                                    |
| JCVI_26368 | 2.476      | moderately similar to (469)AT5G24530   Symbols:   oxidoreductase, 2OG-Fe(II) oxygenase family protein                                                           |
| EX133091   | 2.450      | very weakly similar to (80.9)AT3G14990   Symbols:   4-methyl-5(b-hydroxyethyl)-thiazole monophosphate biosynthesis protein, putative                            |
| JCVI_85    | 2.450      | moderately similar to (432)AT3G15356   Symbols:   legume lectin family protein                                                                                  |
| JCVI_30017 | 2.448      | -                                                                                                                                                               |
| JCVI_20291 | 2.444      | -                                                                                                                                                               |
| JCVI_41280 | 2.430      | -                                                                                                                                                               |
| AM387841   | 2.424      | -                                                                                                                                                               |
| JCVI_28788 | 2.418      | very weakly similar to (99.0)AT5G43570   Symbols:   serine-type endopeptidase inhibitor                                                                         |
| JCVI_2406  | 2.408      | moderately similar to (369)AT2G02930   Symbols: GST16, ATGSTF3   ATGSTF3 (GLUTATHIONE S-TRANSFERASE 16); glutathione transferase                                |
| ES902140   | 2.395      | weakly similar to (149)AT4G25110   Symbols: ATMC2   ATMC2 (METACASPASE 2); caspase                                                                              |
| CX191026   | 2.393      | -                                                                                                                                                               |
| JCVI_8461  | 2.370      | moderately similar to (376)AT1G32450   Symbols:   proton-dependent oligopeptide transport (POT) family protein                                                  |
| ES900687   | 2.366      | moderately similar to (305)AT5G67450   Symbols: AZF1   AZF1 (ZINC-FINGER PROTEIN 1); nucleic acid binding/transcription factor/zinc ion binding                 |
| JCVI_16492 | 2.358      | moderately similar to (330)AT4G27670   Symbols: HSP21   HSP21 (HEAT SHOCK PROTEIN 21)                                                                           |

| Identifier  | UV-control | Reduced - Description                                                                                                                            |
|-------------|------------|--------------------------------------------------------------------------------------------------------------------------------------------------|
| EV226148    | -4.006     | very weakly similar to (85.9)AT1G12610  Symbols: DDF1   DDF1 (DWARF AND DELAYED FLOWERING 1); DNA binding / transcription factor                 |
| JCVI_11950  | -3.761     | weakly similar to (103)AT1G12610  Symbols: DDF1   DDF1 (DWARF AND DELAYED FLOWERING 1); DNA binding / transcription factor                       |
| JCVI_21273  | -3.422     | weakly similar to (189)AT4G34410  Symbols:   AP2 domain-containing transcription factor, putative                                                |
| EV205209    | -3.403     | -                                                                                                                                                |
| EE549228    | -3.341     | very weakly similar to (91.3)AT3G50060  Symbols: MYB77   MYB77; DNA binding / transcription factor                                               |
| EV101357    | -3.322     | weakly similar to (173)AT2G20790  Symbols:   protein binding / protein transporter                                                               |
| JCVI_11230  | -3.221     | highly similar to (841)AT5G23050  Symbols:   acyl-activating enzyme 17 (AAE17)                                                                   |
| EV169330    | -3.194     | -                                                                                                                                                |
| EE561702    | -3.191     | -                                                                                                                                                |
| JCVI_41856  | -3.056     | moderately similar to (224)AT1G74930  Symbols: ORA47   ORA47; DNA binding / transcription factor  original descriptor                            |
| JCVI_12658  | -2.992     | weakly similar to (170)AT5G52300  Symbols: RD29B, LTI65   LTI65/RD29B (RESPONSIVE TO DESSICATION 29B)   no original descriptor                   |
| JCVI_16557  | -2.887     | moderately similar to (273)AT3G50060  Symbols: MYB77   DNA binding / transcription factor  similar to (102)MYBA1_ORYSA no original descriptor    |
| EV142036    | -2.794     | -                                                                                                                                                |
| JCVI_6654   | -2.781     | moderately similar to (272)AT4G32800  Symbols:   AP2 domain-containing transcription factor TINY, putative                                       |
| JCVI_10390  | -2.695     | moderately similar to (476)AT5G62520  Symbols: SRO5   SRO5 (SIMILAR TO RCD ONE 5); NAD+ ADP-ribosyltransferase                                   |
| EE443906    | -2.688     | weakly similar to (152)AT2G02240  Symbols: MEE66   MEE66 (maternal effect embryo arrest 66)                                                      |
| JCVI_11582  | -2.644     | highly similar to (734)AT1G63420  Symbols:   similar to unknown protein (AT5G23850.1); contains domain DUF821, CAP10-like (InterPro:IPR008539)   |
| JCVI_40140  | -2.605     | moderately similar to (340)AT1G10090  Symbols:   similar to RXW8 (AT1G58520.1); contains domain of unknown function DUF221; (InterPro:IPR003864) |
| JCVI_20197  | -2.605     | -                                                                                                                                                |
| JCVI_18770  | -2.593     | very weakly similar to (89.0)AT5G52300  Symbols: RD29B, LTI65   LTI65/RD29B (RESPONSIVE TO DESSICATION 29B)                                      |
| JCVI_17105  | -2.591     | very weakly similar to (97.1)AT5G52300  Symbols: RD29B, LTI65   LTI65/RD29B (RESPONSIVE TO DESSICATION 29B)                                      |
| H74571      | -2.589     | -                                                                                                                                                |
| JCVI_14413  | -2.565     | -                                                                                                                                                |
| JCVI_26301  | -2.513     | moderately similar to (240)AT1G19210  Symbols:   AP2 domain-containing transcription factor, putative                                            |
| JCVI_13070  | -2.463     | -                                                                                                                                                |
| H74394      | -2.450     | weakly similar to (115)AT1G12630  Symbols:   DNA binding / transcription activator/ transcription factor                                         |
| RC_BQ704694 | -2.436     | -                                                                                                                                                |
| JCVI_38370  | -2.382     | moderately similar to (416)AT4G29780  Symbols:   similar to unknown protein (AT5G12010.1); contains domain PTHR22930 (PTHR22930)                 |
| EX135872    | -2.373     | moderately similar to (384)AT1G10090  Symbols:   similar to RXW8 (AT1G58520.1); contains InterPro domain DUF221; (InterPro:IPR003864)            |
| JCVI_20564  | -2.367     | weakly similar to (144)AT5G62520  Symbols: SRO5   SRO5 (SIMILAR TO RCD ONE 5); NAD+ ADP-ribosyltransferase                                       |
| JCVI_32755  | -2.363     | moderately similar to (259)AT4G01360  Symbols:   similar to BPS1 (BYPASS 1) (AT1G01550.2)                                                        |
| EE455964    | -2.360     | very weakly similar to (89.4)AT5G44005  Symbols:   unknown protein                                                                               |
| H74709      | -2.331     | very weakly similar to (93.6)AT3G57010  Symbols:   strictosidine synthase family protein                                                         |
| JCVI_34763  | -2.296     | weakly similar to (118)AT3G19170  Symbols: BCAT4   (BRANCHED-CHAIN AMINOTRANSFERASE4); catalytic/ methionine-oxo-acid transaminase               |
| EE434350    | -2.286     | -                                                                                                                                                |
| JCVI_32987  | -2.281     | moderately similar to (204)AT5G62520  Symbols: SRO5   SRO5 (SIMILAR TO RCD ONE 5); NAD+ ADP-ribosyltransferase                                   |
| JCVI_6514   | -2.269     | moderately similar to (318)AT3G57010  Symbols:   strictosidine synthase family protein                                                           |
| JCVI_7541   | -2.251     | very weakly similar to (93.6)AT1G62510  Symbols:   protease inhibitor/seed storage/lipid transfer protein (LTP) family protein                   |
| JCVI_20042  | -2.246     | moderately similar to (349)AT5G45340  Symbols: CYP707A3   CYP707A3 (cytochrome P450, family 707, subfamily A, polypeptide 3); oxygen binding     |
| JCVI_41582  | -2.224     | very weakly similar to (85.5)AT3G49370  Symbols:   calcium-dependent protein kinase, putative / CDPK, putative                                   |
| JCVI_22998  | -2.200     | -                                                                                                                                                |
| EV169436    | -2.200     | weakly similar to (133)AT2G16660  Symbols:   nodulin family protein                                                                              |
| JCVI_15401  | -2.164     | weakly similar to (111)AT2G02240  Symbols: MEE66   MEE66 (maternal effect embryo arrest 66)                                                      |
| EV117567    | -2.108     | very weakly similar to (91.3)AT3G06760  Symbols:   identical to DEHYDRATION-INDUCED 19 (DI19-4); similar to HRB1 (AT5G49230.1)                   |
| EE524030    | -2.098     | very weakly similar to (80.1)AT3G46620  Symbols:   zinc finger (C3HC4-type RING finger) family protein                                           |
| JCVI_18326  | -2.097     | moderately similar to (384)AT4G01360  Symbols:   similar to BPS1 (BYPASS 1) (AT1G01550.2); similar to BPS1 (BYPASS 1) (TAIR:AT1G01550.1)         |
| JCVI_4859   | -2.091     | moderately similar to (210)AT1G65980  Symbols: TPX1   TPX1 (THIOREDOXIN-DEPENDENT PEROXIDASE 1); antioxidant                                     |
| JCVI_31515  | -2.088     | moderately similar to (356)AT1G13560  Symbols: AAPT1   AAPT1 (AMINOALCOHOLPHOSPHOTRANSFERASE 1); phosphatidyltransferase                         |
| ES978129    | -2.078     | very weakly similar to (91.3)AT5G63350  Symbols:   similar to unknown protein (AT3G48510.1)                                                      |
| JCVI_669    | -2.072     | moderately similar to (315)AT4G17490  Symbols: ERF-6-6, ATERF6   (ETHYLENE RESPONSIVE FACTOR 6); DNA binding / transcription factor              |
| AM386021    | -2.070     | -                                                                                                                                                |
| JCVI_1043   | -2.043     | -                                                                                                                                                |
| JCVI_1570   | -2.035     | moderately similar to (495)AT3G57010  Symbols:   strictosidine synthase family protein                                                           |
| JCVI_23374  | -2.016     | -                                                                                                                                                |
| JCVI_39109  | -2.010     | moderately similar to (201)AT5G23130  Symbols:   peptidoglycan-binding LysM domain-containing protein                                            |
| JCVI_36253  | -2.001     | moderately similar to (437)AT4G11280  Symbols:   ACS6 (1-AMINOCYCLOPROPANE-1-CARBOXYLIC ACID (ACC) SYNTHASE 6)                                   |
| DT317662    | -1.998     | very weakly similar to (80.1)AT3G19030  Symbols:   similar to unknown protein (AT1G49500.1)                                                      |
| JCVI_27977  | -1.968     | moderately similar to (384)AT5G23130  Symbols:   peptidoglycan-binding LysM domain-containing protein                                            |
| JCVI_3132   | -1.964     | moderately similar to (321)AT2G27080  Symbols:   harpin-induced protein-related / HIN1-related / harpin-responsive protein-related               |
| JCVI_36420  | -1.950     | -                                                                                                                                                |
| EX100533    | -1.950     | weakly similar to (167)AT1G09950  Symbols:   transcription factor-related                                                                        |
| JCVI_34761  | -1.940     | weakly similar to (129)AT2G34600  Symbols: JAZ7, TIFY5B   JAZ7/TIFY5B (IASMONATE-ZIM-DOMAIN PROTEIN 7)                                           |
| JCVI_38038  | -1.938     | weakly similar to (136)AT5G66650  Symbols:   similar to unknown protein (AT2G23790.1); domain of unknown function DUF607 (InterPro:IPR006769)    |
| EV133613    | -1.934     | -                                                                                                                                                |
| H07351      | -1.932     | very weakly similar to (85.9)AT5G17350  Symbols:   similar to unknown protein (AT3G03280.1)                                                      |
| JCVI_40884  | -1.918     | weakly similar to (146)AT4G29780  Symbols:   similar to unknown protein (AT5G12010.1); contains domain PTHR22930 (PTHR22930)                     |
| JCVI_5550   | -1.917     | highly similar to (577)AT5G14200  Symbols:   3-isopropylmalate dehydrogenase, chloroplast, putative                                              |
| EX142036    | -1.906     | weakly similar to (143)AT5G64260  Symbols:   phosphate-responsive protein, putative                                                              |
| JCVI_16456  | -1.903     | moderately similar to (367)AT3G15540  Symbols: MSG2, IAA19   IAA19 (indoleacetic acid-induced protein 19); transcription factor                  |
| EX125776    | -1.900     | moderately similar to (435)AT5G40800  Symbols:   similar to unknown protein (AT3G27250.1)                                                        |
| JCVI_2577   | -1.897     | moderately similar to (264)AT5G05270  Symbols:   chalcone-flavanone isomerase family protein                                                     |
| JCVI_8892   | -1.895     | moderately similar to (261)AT2G15970  Symbols: WCOR413, ATCOR413-PM1, FL3-5A3   COR413-PM1 (cold regulated 413 plasma membrane 1)                |
| JCVI_17114  | -1.895     | moderately similar to (344)AT1G18300  Symbols: ATNUDT4   ATNUDT4 (Arabidopsis thaliana Nudix hydrolase homolog 4); hydrolase                     |
| JCVI_11726  | -1.895     | highly similar to (898)AT1G30360  Symbols: ERD4   ERD4 (EARLY-RESPONSIVE TO DEHYDRATION 4)                                                       |
| JCVI_30455  | -1.881     | moderately similar to (415)AT5G23010  Symbols: IMS3, MAM1   MAM1 (2-isopropylmalate synthase 3); 2-isopropylmalate synthase                      |
| EX056879    | -1.873     | very weakly similar to (84)AT1G16410  Symbols: BUS1, SP51, BUSHY 1, CYP79F1, SUPERSHOOT 1, CYTOCHROME P450 79F:                                  |
| JCVI_8258   | -1.856     | weakly similar to (144)AT2G46490  Symbols:   similar to unknown protein [Arabidopsis thaliana] [AT5G35110.1]                                     |
| JCVI_2436   | -1.852     | moderately similar to (377)AT1G54040  Symbols: ESR, TASTY, ESP   ESP (EPITHIOSPECIFIER PROTEIN)                                                  |
| EV008234    | -1.849     | weakly similar to (145)AT3G59350  Symbols:   serine/threonine protein kinase, putative                                                           |
| JCVI_14524  | -1.847     | moderately similar to (243)AT3G11410  Symbols: ATPP2CA, AHG3   (PROTEIN PHOSPHATASE 2CA); protein binding / serine/threonine phosphatase         |
| EV108573    | -1.839     | -                                                                                                                                                |
| JCVI_18666  | -1.839     | weakly similar to (136)AT2G17660  Symbols:   nitrate-responsive NOI protein, putative                                                            |
| JCVI_20622  | -1.834     | -                                                                                                                                                |
| JCVI_36200  | -1.831     | weakly similar to (108)AT2G16660  Symbols:   nodulin family protein                                                                              |
| JCVI_17081  | -1.828     | weakly similar to (108)AT5G17350  Symbols:   similar to unknown protein (AT3G03280.1)                                                            |
| JCVI_81     | -1.825     | moderately similar to (409)AT1G80840  Symbols: ATWRKY40, WRKY40   WRKY40 (WRKY DNA-binding protein 40); transcription factor                     |
| CV545450    | -1.824     | moderately similar to (218)AT4G17970  Symbols:   similar to unknown protein (AT5G46600.1; AT5G46610.1); contains UPF0005 (InterPro:IPR006214)    |
| JCVI_11504  | -1.818     | moderately similar to (361)AT1G18300  Symbols: ATNUDT4   ATNUDT4 (Arabidopsis thaliana Nudix hydrolase homolog 4); hydrolase                     |
| JCVI_7373   | -1.817     | moderately similar to (264)AT3G11930  Symbols:   universal stress protein (USP) family protein                                                   |
| JCVI_31468  | -1.815     | moderately similar to (469)AT5G67480  Symbols: BT4   BT4 (BTB AND TAZ DOMAIN PROTEIN 4); protein binding                                         |
| JCVI_38563  | -1.799     | weakly similar to (138)AT3G19580  Symbols: AZF2   AZF2 (ARABIDOPSIS ZINC-FINGER PROTEIN 2)                                                       |
| JCVI_20274  | -1.780     | weakly similar to (182)AT2G30020  Symbols:   protein phosphatase 2C, putative / PP2C, putative                                                   |
| EE567609    | -1.774     | -                                                                                                                                                |
| EE401951    | -1.770     | weakly similar to (169)AT5G23010  Symbols: IMS3, MAM1   MAM1 (2-isopropylmalate synthase 3); 2-isopropylmalate synthase                          |
| JCVI_3974   | -1.768     | moderately similar to (380)AT5G13930  Symbols: CHS, TT4, ATCHS   ATCHS/CHS/TT4 (CHALCONE SYNTHASE); naringenin-chalcone synthase                 |
| JCVI_23235  | -1.767     | moderately similar to (379)AT5G14950  Symbols: GMII, ATGMII   ATGMII/GMII (GOLGI ALPHA-MANNOSIDASE II); alpha-mannosidase                        |
| JCVI_32566  | -1.759     | highly similar to (712)AT1G30360  Symbols: ERD4   ERD4 (EARLY-RESPONSIVE TO DEHYDRATION 4)                                                       |
| EX131720    | -1.744     | -                                                                                                                                                |
| JCVI_17662  | -1.737     | moderately similar to (475)AT4G32480  Symbols:   similar to unknown protein (AT2G20670.1); contains domain DUF506, plant (InterPro:IPR006502)    |
| EV215033    | -1.735     | -                                                                                                                                                |

| Identifier | UV-control | Flavonoide - Description                                                                                                                           |
|------------|------------|----------------------------------------------------------------------------------------------------------------------------------------------------|
| ex131200   | 1.801      | moderately similar to (446)AT5G49690   Symbols:   UDP-glucuronosyl/UDP-glucosyl transferase family protein                                         |
| jcv1_30937 | 1.130      | weakly similar to (137)AT5G39080   Symbols:   transferase family protein                                                                           |
| ev009114   | 1.085      | moderately similar to (375)AT4G10490   Symbols:   oxidoreductase, 2OG-Fe(II) oxygenase family protein                                              |
| am062005   | 0.855      | moderately similar to (264)AT3G29635   Symbols:   transferase family protein                                                                       |
| jcv1_13173 | 0.696      | moderately similar to (455)AT1G80820   Symbols: CCR2   CCR2 (CINNAMOYL COA REDUCTASE)                                                              |
| jcv1_27419 | 0.666      | moderately similar to (356)AT5G39080   Symbols:   transferase family protein                                                                       |
| jcv1_4502  | 0.644      | highly similar to (560)AT1G80820   Symbols: CCR2   CCR2 (CINNAMOYL COA REDUCTASE)                                                                  |
| es910915   | 0.603      | moderately similar to (347)AT3G29680   Symbols:   transferase family protein                                                                       |
| am056777   | 0.581      | moderately similar to (272)AT3G29670   Symbols:   transferase family protein                                                                       |
| jcv1_809   | 0.579      | moderately similar to (258)AT3G29635   Symbols:   transferase family protein                                                                       |
| jcv1_5913  | 0.510      | highly similar to (571)AT5G58490   Symbols:   cinnamoyl-CoA reductase family                                                                       |
| jcv1_7599  | 0.505      | moderately similar to (262)AT3G10340   Symbols: PAL4   phenylalanine ammonia-lyase, putative                                                       |
| jcv1_243   | 0.483      | moderately similar to (426)AT1G19540   Symbols:   isoflavone reductase, putative                                                                   |
| jcv1_5637  | 0.407      | highly similar to (626)AT3G29635   Symbols:   transferase family protein                                                                           |
| cd826733   | 0.382      | moderately similar to (227)AT4G10490   Symbols:   oxidoreductase, 2OG-Fe(II) oxygenase family protein                                              |
| es917670   | 0.330      | moderately similar to (333)AT1G78550   Symbols:   oxidoreductase, 2OG-Fe(II) oxygenase family protein                                              |
| cx280917   | 0.326      | weakly similar to (131)AT1G78550   Symbols:   oxidoreductase, 2OG-Fe(II) oxygenase family protein                                                  |
| jcv1_814   | 0.315      | highly similar to (602)AT1G15950   Symbols: IRX4, ATCCR1, CCR1   CCR1 (CINNAMOYL COA REDUCTASE 1)                                                  |
| jcv1_811   | 0.303      | highly similar to (608)AT1G68540   Symbols:   oxidoreductase family protein                                                                        |
| jcv1_27081 | 0.302      | highly similar to (736)AT4G34850   Symbols:   chalcone and stilbene synthase family protein                                                        |
| ex131530   | 0.255      | weakly similar to (131)AT3G55120   Symbols: TT5, A11, CFI   A11/CFI/TT5 (TRANSPARENT TESTA 5); chalcone isomerase                                  |
| jcv1_5348  | 0.253      | moderately similar to (393)AT4G27250   Symbols:   dihydroflavonol 4-reductase family / dihydrokaempferol 4-reductase family                        |
| jcv1_7597  | 0.219      | moderately similar to (435)AT1G75280   Symbols:   isoflavone reductase, putative                                                                   |
| jcv1_28194 | 0.215      | highly similar to (590)AT5G39080   Symbols:   transferase family protein                                                                           |
| jcv1_24927 | 0.205      | moderately similar to (305)AT5G39050   Symbols:   transferase family protein                                                                       |
| jcv1_14166 | 0.183      | highly similar to (504)AT1G59950   Symbols:   aldo/keto reductase, putative                                                                        |
| ev046864   | 0.167      | weakly similar to (101)AT5G63590   Symbols: FLS   FLS (Flavonol synthase); flavonol synthase                                                       |
| jcv1_13093 | 0.161      | moderately similar to (479)AT3G29635   Symbols:   transferase family protein                                                                       |
| el589299   | 0.142      | moderately similar to (254)AT3G29670   Symbols:   transferase family protein                                                                       |
| jcv1_15733 | 0.125      | moderately similar to (260)AT4G00040   Symbols:   chalcone and stilbene synthase family protein                                                    |
| jcv1_9569  | 0.124      | moderately similar to (442)AT1G75280   Symbols:   isoflavone reductase, putative                                                                   |
| jcv1_3751  | 0.118      | moderately similar to (281)AT3G11180   Symbols:   oxidoreductase, 2OG-Fe(II) oxygenase family protein                                              |
| cn829121   | 0.103      | weakly similar to (163)AT4G10490   Symbols:   oxidoreductase, 2OG-Fe(II) oxygenase family protein                                                  |
| dy029766   | 0.094      | moderately similar to (234)AT3G49620   Symbols: DIN11   DIN11 (DARK INDUCIBLE 11); oxidoreductase                                                  |
| jcv1_15782 | 0.079      | moderately similar to (263)AT4G00040   Symbols:   chalcone and stilbene synthase family protein                                                    |
| ev137509   | 0.070      | weakly similar to (184)AT4G35420   Symbols:   dihydroflavonol 4-reductase family / dihydrokaempferol 4-reductase family                            |
| jcv1_512   | 0.062      | moderately similar to (355)AT1G53520   Symbols:   chalcone-flavanone isomerase-related                                                             |
| ex140051   | 0.057      | weakly similar to (153)AT4G10500   Symbols:   oxidoreductase, 2OG-Fe(II) oxygenase family protein                                                  |
| ev151622   | 0.056      | moderately similar to (265)AT4G35420   Symbols:   dihydroflavonol 4-reductase family / dihydrokaempferol 4-reductase family                        |
| jcv1_19465 | 0.055      | weakly similar to (136)AT5G08640   Symbols: FLS   FLS (FLAVONOL SYNTHASE)                                                                          |
| jcv1_15212 | 0.046      | highly similar to (863)AT2G37040   Symbols: PAL1   PAL1 (PHE AMMONIA LYASE 1); phenylalanine ammonia-lyase                                         |
| jcv1_3980  | 0.037      | moderately similar to (386)AT4G34540   Symbols:   isoflavone reductase family protein                                                              |
| jcv1_35449 | 0.032      | weakly similar to (174)AT4G35420   Symbols:   dihydroflavonol 4-reductase family / dihydrokaempferol 4-reductase family                            |
| ee502236   | 0.031      | weakly similar to (129)AT5G08640   Symbols: FLS   FLS (FLAVONOL SYNTHASE)                                                                          |
| jcv1_39687 | 0.029      | weakly similar to (176)AT5G63590   Symbols: FLS   FLS (Flavonol synthase); flavonol synthase                                                       |
| ev103250   | 0.027      | moderately similar to (288)AT3G29670   Symbols:   transferase family protein                                                                       |
| jcv1_11314 | 0.027      | moderately similar to (360)AT3G29670   Symbols:   transferase family protein                                                                       |
| ev002180   | 0.023      | moderately similar to (273)AT5G13930   Symbols: CHS, TT4, ATCHS   ATCHS/CHS/TT4 (CHALCONE SYNTHASE); naringenin-chalcone synthase                  |
| jcv1_17935 | 0.022      | moderately similar to (358)AT5G13930   Symbols: CHS, TT4, ATCHS   ATCHS/CHS/TT4 (CHALCONE SYNTHASE); naringenin-chalcone synthase                  |
| jcv1_10248 | 0.021      | moderately similar to (450)AT3G49620   Symbols: DIN11   DIN11 (DARK INDUCIBLE 11); oxidoreductase                                                  |
| ev005315   | 0.021      | weakly similar to (169)AT5G13930   Symbols: CHS, TT4, ATCHS   ATCHS/CHS/TT4 (CHALCONE SYNTHASE); naringenin-chalcone synthase                      |
| jcv1_10836 | 0.018      | weakly similar to (199)AT4G34850   Symbols:   chalcone and stilbene synthase family protein                                                        |
| jcv1_888   | 0.017      | moderately similar to (386)AT4G00040   Symbols:   chalcone and stilbene synthase family protein                                                    |
| es947547   | 0.015      | moderately similar to (262)AT5G42800   Symbols: TT3, M318, DFR   DFR (DIHYDROFLAVONOL 4-REDUCTASE); dihydrokaempferol 4-reductase                  |
| jcv1_37282 | 0.012      | moderately similar to (479)AT1G35190   Symbols:   oxidoreductase, 2OG-Fe(II) oxygenase family protein                                              |
| jcv1_34084 | 0.012      | moderately similar to (343)AT1G78550   Symbols:   oxidoreductase, 2OG-Fe(II) oxygenase family protein                                              |
| eg020925   | 0.010      | weakly similar to (111)AT3G29680   Symbols:   transferase family protein                                                                           |
| jcv1_9810  | 0.006      | moderately similar to (477)AT3G29670   Symbols:   transferase family protein                                                                       |
| jcv1_20556 | 0.000      | moderately similar to (224)AT2G39980   Symbols:   transferase family protein                                                                       |
| ev227471   | -0.001     | weakly similar to (115)AT1G75290   Symbols:   isoflavone reductase, putative                                                                       |
| ex125779   | -0.005     | moderately similar to (201)AT1G75280   Symbols:   isoflavone reductase, putative                                                                   |
| jcv1_18538 | -0.007     | moderately similar to (293)AT3G55120   Symbols: TT5, A11, CFI   A11/CFI/TT5 (TRANSPARENT TESTA 5); chalcone isomerase                              |
| jcv1_19635 | -0.010     | moderately similar to (281)AT4G33360   Symbols:   terpene cyclase/mutase-related                                                                   |
| jcv1_19635 | -0.010     | moderately similar to (281)AT4G33360   Symbols:   terpene cyclase/mutase-related                                                                   |
| ex132195   | -0.010     | moderately similar to (229)AT3G29670   Symbols:   transferase family protein                                                                       |
| jcv1_8954  | -0.014     | moderately similar to (336)AT5G49690   Symbols:   UDP-glucuronosyl/UDP-glucosyl transferase family protein                                         |
| jcv1_8954  | -0.014     | moderately similar to (336)AT5G49690   Symbols:   UDP-glucuronosyl/UDP-glucosyl transferase family protein                                         |
| cd814611   | -0.018     | moderately similar to (262)AT1G50580   Symbols:   glycosyltransferase family protein                                                               |
| ev216381   | -0.024     | weakly similar to (194)AT5G63590   Symbols: FLS   FLS (Flavonol synthase); flavonol synthase                                                       |
| jcv1_31142 | -0.025     | moderately similar to (363)AT3G55120   Symbols: TT5, A11, CFI   A11/CFI/TT5 (TRANSPARENT TESTA 5); chalcone isomerase                              |
| ex130280   | -0.027     | weakly similar to (163)AT3G29670   Symbols:   transferase family protein                                                                           |
| jcv1_6971  | -0.028     | moderately similar to (314)AT1G61720   Symbols: BAN   BAN (BANYULS)                                                                                |
| jcv1_14319 | -0.030     | moderately similar to (303)AT5G39080   Symbols:   transferase family protein                                                                       |
| ev055145   | -0.031     | moderately similar to (211)AT3G29670   Symbols:   transferase family protein                                                                       |
| ev043129   | -0.033     | weakly similar to (105)AT4G27250   Symbols:   dihydroflavonol 4-reductase family / dihydrokaempferol 4-reductase family                            |
| ex138257   | -0.036     | moderately similar to (436)AT3G46490   Symbols:   oxidoreductase, with incorporation or reduction of molecular oxygen, 2-oxoglutarate as one donor |
| jcv1_1900  | -0.037     | highly similar to (538)AT4G33360   Symbols:   terpene cyclase/mutase-related                                                                       |
| ev103220   | -0.041     | weakly similar to (122)AT1G75290   Symbols:   isoflavone reductase, putative                                                                       |
| ee517895   | -0.051     | moderately similar to (283)AT1G78550   Symbols:   oxidoreductase, 2OG-Fe(II) oxygenase family protein                                              |
| jcv1_15361 | -0.053     | moderately similar to (367)AT3G49620   Symbols: DIN11   DIN11 (DARK INDUCIBLE 11); oxidoreductase                                                  |
| ev206420   | -0.059     | weakly similar to (124)AT4G01070   Symbols: GT72B1   GT72B1: UDP-glucosyltransferase/UDP-glucosyltransferase                                       |
| ex035802   | -0.060     | moderately similar to (275)AT3G11180   Symbols:   oxidoreductase, 2OG-Fe(II) oxygenase family protein                                              |
| ex035802   | -0.060     | moderately similar to (275)AT3G11180   Symbols:   oxidoreductase, 2OG-Fe(II) oxygenase family protein                                              |
| cd836896   | -0.062     | weakly similar to (155)AT3G29670   Symbols:   transferase family protein                                                                           |
| ev092581   | -0.070     | weakly similar to (145)AT3G49620   Symbols: DIN11   DIN11 (DARK INDUCIBLE 11); oxidoreductase                                                      |
| ev141692   | -0.073     | weakly similar to (137)AT4G34850   Symbols:   chalcone and stilbene synthase family protein                                                        |
| ee502168   | -0.074     | weakly similar to (192)AT4G27560   Symbols:   glycosyltransferase family protein                                                                   |
| jcv1_38573 | -0.080     | weakly similar to (177)AT4G35420   Symbols:   dihydroflavonol 4-reductase family / dihydrokaempferol 4-reductase family                            |
| jcv1_18743 | -0.080     | moderately similar to (327)AT4G25300   Symbols:   oxidoreductase, 2OG-Fe(II) oxygenase family protein                                              |
| jcv1_6646  | -0.081     | moderately similar to (434)AT5G39080   Symbols:   transferase family protein                                                                       |
| ee477750   | -0.083     | weakly similar to (197)AT3G13610   Symbols:   oxidoreductase, 2OG-Fe(II) oxygenase family protein                                                  |
| jcv1_8547  | -0.084     | moderately similar to (301)AT4G35420   Symbols:   dihydroflavonol 4-reductase family / dihydrokaempferol 4-reductase family                        |
| jcv1_9319  | -0.085     | weakly similar to (166)AT1G32100   Symbols:   pinorensinol-laricresinol reductase, putative                                                        |
| jcv1_10710 | -0.089     | nearly identical (1101)AT3G53260   Symbols: PAL2   PAL2 (phenylalanine ammonia-lyase 2); phenylalanine ammonia-lyase                               |
| es954613   | -0.089     | moderately similar to (209)AT1G53520   Symbols:   chalcone-flavanone isomerase-related                                                             |
| ev160950   | -0.093     | moderately similar to (206)AT4G00040   Symbols:   chalcone and stilbene synthase family protein                                                    |
| ex028955   | -0.093     | moderately similar to (222)AT3G29635   Symbols:   transferase family protein                                                                       |
| ev227494   | -0.100     | weakly similar to (191)AT1G75280   Symbols:   isoflavone reductase, putative                                                                       |
| jcv1_14420 | -0.100     | highly similar to (503)AT1G61720   Symbols: BAN   BAN (BANYULS)                                                                                    |
| jcv1_21743 | -0.102     | weakly similar to (183)AT4G34850   Symbols:   chalcone and stilbene synthase family protein                                                        |
| ex090926   | -0.115     | moderately similar to (327)AT3G29680   Symbols:   transferase family protein                                                                       |
| jcv1_22524 | -0.116     | weakly similar to (136)AT4G35420   Symbols:   dihydroflavonol 4-reductase family / dihydrokaempferol 4-reductase family                            |
| jcv1_2460  | -0.123     | moderately similar to (387)AT1G02050   Symbols:   chalcone and stilbene synthase family protein                                                    |
| ev092986   | -0.129     | moderately similar to (321)AT1G25460   Symbols:   oxidoreductase family protein                                                                    |
| jcv1_3312  | -0.131     | moderately similar to (367)AT2G18570   Symbols:   UDP-glucuronosyl/UDP-glucosyl transferase family protein                                         |
| jcv1_5     | -0.136     | moderately similar to (415)AT1G02050   Symbols:   chalcone and stilbene synthase family protein                                                    |
| jcv1_25102 | -0.144     | moderately similar to (235)AT4G35420   Symbols:   dihydroflavonol 4-reductase family / dihydrokaempferol 4-reductase family                        |
| jcv1_23968 | -0.146     | highly similar to (549)AT1G32100   Symbols:   pinorensinol-laricresinol reductase, putative                                                        |
| jcv1_26671 | -0.147     | moderately similar to (262)AT4G39230   Symbols:   isoflavone reductase, putative                                                                   |
| ee435741   | -0.150     | weakly similar to (155)AT1G01390   Symbols:   UDP-glucuronosyl/UDP-glucosyl transferase family protein                                             |
| jcv1_26515 | -0.161     | weakly similar to (136)AT5G13930   Symbols: CHS, TT4, ATCHS   ATCHS/CHS/TT4 (CHALCONE SYNTHASE); naringenin-chalcone synthase                      |
| jcv1_17602 | -0.162     | moderately similar to (279)AT3G53260   Symbols: PAL2   PAL2 (phenylalanine ammonia-lyase 2); phenylalanine ammonia-lyase                           |
| jcv1_14094 | -0.208     | highly similar to (582)AT2G02400   Symbols:   cinnamoyl-CoA reductase family                                                                       |
| jcv1_20189 | -0.210     | moderately similar to (279)AT3G55120   Symbols: TT5, A11, CFI   A11/CFI/TT5 (TRANSPARENT TESTA 5); chalcone isomerase                              |
| jcv1_26257 | -0.210     | moderately similar to (431)AT1G25460   Symbols:   oxidoreductase family protein                                                                    |
| am394517   | -0.211     | weakly similar to (105)AT4G35420   Symbols:   dihydroflavonol 4-reductase family / dihydrokaempferol 4-reductase family                            |

|            |        |                                       |                                                                                            |
|------------|--------|---------------------------------------|--------------------------------------------------------------------------------------------|
| ee421317   | -0.213 | moderately similar to ( 226)AT3G29670 | Symbols:   transferase family protein                                                      |
| jvci_10975 | -0.236 | moderately similar to ( 387)AT3G53260 | Symbols: PAL2   PAL2 (phenylalanine ammonia-lyase 2); phenylalanine ammonia-lyase          |
| jvci_37761 | -0.245 | highly similar to ( 549)AT4G39230     | Symbols:   isoflavone reductase, putative                                                  |
| jvci_19663 | -0.283 | highly similar to ( 697)AT3G53260     | Symbols: PAL2   PAL2 (phenylalanine ammonia-lyase 2); phenylalanine ammonia-lyase          |
| jvci_20382 | -0.287 | moderately similar to ( 385)AT1G53520 | Symbols:   chalcone-flavanone isomerase-related                                            |
| jvci_32380 | -0.292 | moderately similar to ( 428)AT3G53260 | Symbols: PAL2   PAL2 (phenylalanine ammonia-lyase 2); phenylalanine ammonia-lyase          |
| cd819938   | -0.300 | weakly similar to ( 140)AT2G45400     | Symbols: BEN1   BEN1; oxidoreductase, acting on CH-OH group of donors                      |
| dt317691   | -0.312 | weakly similar to ( 104)AT3G53260     | Symbols: PAL2   PAL2 (phenylalanine ammonia-lyase 2); phenylalanine ammonia-lyase          |
| jvci_23208 | -0.335 | moderately similar to ( 491)AT1G35190 | Symbols:   oxidoreductase_2OG-Fe(II) oxygenase family protein                              |
| am389689   | -0.345 | weakly similar to ( 147)AT2G29730     | Symbols:   UDP-glucuronosyl/UDP-glucosyl transferase family protein                        |
| jvci_14516 | -0.355 | weakly similar to ( 170)AT1G19540     | Symbols:   isoflavone reductase, putative                                                  |
| jvci_41972 | -0.358 | moderately similar to ( 312)AT5G63580 | Symbols:   flavonol synthase, putative                                                     |
| jvci_9433  | -0.393 | moderately similar to ( 444)AT2G33590 | Symbols:   cinnamoyl-CoA reductase family                                                  |
| jvci_31462 | -0.402 | moderately similar to ( 216)AT2G37040 | Symbols: PAL1   PAL1 (PHE AMMONIA LYASE 1); phenylalanine ammonia-lyase                    |
| jvci_22515 | -0.431 | highly similar to ( 882)AT3G10340     | Symbols: PAL4   phenylalanine ammonia-lyase, putative                                      |
| jvci_27862 | -0.529 | moderately similar to ( 306)AT2G45400 | Symbols: BEN1   BEN1; oxidoreductase, acting on CH-OH group of donors                      |
| ee418726   | -0.567 | moderately similar to ( 307)AT2G37040 | Symbols: PAL1   PAL1 (PHE AMMONIA LYASE 1); phenylalanine ammonia-lyase                    |
| jvci_2239  | -0.622 | weakly similar to ( 196)AT5G63590     | Symbols: FLS   FLS (Flavonol synthase); flavonol synthase                                  |
| jvci_13216 | -0.647 | highly similar to ( 868)AT2G37040     | Symbols: PAL1   PAL1 (PHE AMMONIA LYASE 1); phenylalanine ammonia-lyase                    |
| ee515919   | -0.703 | weakly similar to ( 149)AT2G45400     | Symbols: BEN1   BEN1; oxidoreductase, acting on CH-OH group of donors                      |
| jvci_26334 | -0.797 | highly similar to ( 535)AT1G75280     | Symbols:   isoflavone reductase, putative                                                  |
| ev152862   | -0.805 | moderately similar to ( 381)AT2G37040 | Symbols: PAL1   PAL1 (PHE AMMONIA LYASE 1); phenylalanine ammonia-lyase                    |
| cd834583   | -0.817 | moderately similar to ( 283)AT3G55120 | Symbols: TT5, A11, CFI   A11/CFI/TT5 (TRANSPARENT TESTA 5); chalcone isomerase             |
| jvci_12895 | -0.864 | moderately similar to ( 358)AT5G54010 | Symbols:   glycosyltransferase family protein                                              |
| dy010548   | -0.929 | weakly similar to ( 109)AT4G01070     | Symbols: GT72B1   GT72B1; UDP-glucosyltransferase/ UDP-glucosyltransferase/ transferase    |
| dy025170   | -0.955 | moderately similar to ( 404)AT5G54060 | Symbols: UF3GT   UF3GT (UDP-GLUCOSE:FLAVONOID 3-O-GLUCOSYLTRANSFERASE); transferase        |
| jvci_17031 | -0.959 | moderately similar to ( 444)AT3G51240 | Symbols: TT6, F3H, F3H   F3H (TRANSPARENT TESTA 6); naringenin 3-dioxygenase               |
| jvci_38481 | -0.965 | moderately similar to ( 288)AT1G75280 | Symbols:   isoflavone reductase, putative                                                  |
| jvci_11889 | -1.089 | moderately similar to ( 307)AT5G42800 | Symbols: TT3, M318, DFR   DFR (DIHYDROFLAVONOL 4-REDUCTASE); dihydrokaempferol 4-reductase |
| jvci_18158 | -1.092 | moderately similar to ( 219)AT4G22880 | Symbols: TDS4, TT18, ANS, LDOX   LDOX (TANNIN DEFICIENT SEED 4)                            |
| jvci_1334  | -1.115 | weakly similar to ( 172)AT5G13930     | Symbols: CHS, TT4, ATCHS   ATCHS/CHS/TT4 (CHALCONE SYNTHASE); naringenin-chalcone synthase |
| jvci_2411  | -1.195 | moderately similar to ( 468)AT5G13930 | Symbols: CHS, TT4, ATCHS   ATCHS/CHS/TT4 (CHALCONE SYNTHASE); naringenin-chalcone synthase |
| jvci_13996 | -1.204 | weakly similar to ( 171)AT4G01070     | Symbols: GT72B1   GT72B1; UDP-glucosyltransferase/ UDP-glucosyltransferase/ transferase    |
| jvci_6210  | -1.460 | moderately similar to ( 303)AT5G13930 | Symbols: CHS, TT4, ATCHS   ATCHS/CHS/TT4 (CHALCONE SYNTHASE); naringenin-chalcone synthase |
| jvci_2058  | -1.573 | moderately similar to ( 454)AT5G13930 | Symbols: CHS, TT4, ATCHS   ATCHS/CHS/TT4 (CHALCONE SYNTHASE); naringenin-chalcone synthase |
| jvci_2414  | -1.597 | moderately similar to ( 441)AT5G13930 | Symbols: CHS, TT4, ATCHS   ATCHS/CHS/TT4 (CHALCONE SYNTHASE); naringenin-chalcone synthase |
| jvci_2934  | -1.632 | highly similar to ( 589)AT5G08640     | Symbols: FLS   FLS (FLAVONOL SYNTHASE)                                                     |
| jvci_3974  | -1.768 | moderately similar to ( 380)AT5G13930 | Symbols: CHS, TT4, ATCHS   ATCHS/CHS/TT4 (CHALCONE SYNTHASE); naringenin-chalcone synthase |
| jvci_2577  | -1.897 | moderately similar to ( 264)AT5G05270 | Symbols:   chalcone-flavanone isomerase family protein                                     |

| Identifier | UV-control | Glucosinolates - Description                                                                                                                 |
|------------|------------|----------------------------------------------------------------------------------------------------------------------------------------------|
| JCVI_13139 | 1.852      | moderately similar to (317)AT1G12140  Symbols: FMO GS-OX5, FLAVIN-MONOOXYGENASE GLUCOSINOLATE S-OXYGENASE 5                                  |
| AM388472   | 1.680      | weakly similar to (181)AT5G57220  Symbols: CYP81F2, CYTOCHROME P450 81F2                                                                     |
| EX121009   | 1.393      | moderately similar to (237)AT1G18570  Symbols: HIG1, MYB51, MYB DOMAIN PROTEIN 51, HIGH INDOLIC GLUCOSINOLATE 1                              |
| JCVI_18417 | 1.320      | moderately similar to (351)AT5G57220  Symbols: CYP81F2, CYTOCHROME P450 81F2                                                                 |
| EV175932   | 0.881      | weakly similar to (105)AT4G37410  Symbols: CYP81F4, CYTOCHROME P450 81F4                                                                     |
| JCVI_16363 | 0.855      | moderately similar to (203)AT1G12140  Symbols: FMO GS-OX5, FLAVIN-MONOOXYGENASE GLUCOSINOLATE S-OXYGENASE 5                                  |
| EV217091   | 0.797      | moderately similar to (238)AT4g39950  Symbols: CYP79B2, CYTOCHROME P450 79B2                                                                 |
| JCVI_8389  | 0.776      | moderately similar to (230)AT5G23010  Symbols: IMS3, MAM1   MAM1 (2-isopropylmalate synthase 3); 2-isopropylmalate synthase                  |
| JCVI_40366 | 0.686      | weakly similar to (197)AT4G03060-CV1  Symbols: AOP2-CV1, ALKENYL HYDROXALKYL PRODUCING 2 - CAPE VERDE ISLANDS                                |
| JCVI_531   | 0.639      | highly similar to (653)AT2g20610  Symbols: ALF1, RTY1, SUR1, ROOTY 1, SUPERROOT 1, ABERRANT LATERAL ROOT FORMATION 1                         |
| JCVI_33391 | 0.628      | highly similar to (988)AT4g39950  Symbols: CYP79B2, CYTOCHROME P450 79B2                                                                     |
| JCVI_24334 | 0.623      | highly similar to (764)AT4g39950  Symbols: CYP79B2, CYTOCHROME P450 79B2                                                                     |
| JCVI_16379 | 0.560      | highly similar to (563)AT4g39950  Symbols: CYP79B2, CYTOCHROME P450 79B2                                                                     |
| EX132986   | 0.509      | weakly similar to (195)AT1G18570  Symbols: HIG1, MYB51, MYB DOMAIN PROTEIN 51, HIGH INDOLIC GLUCOSINOLATE 1                                  |
| EV125432   | 0.508      | moderately similar to (246)AT4G37410  Symbols: CYP81F4, CYTOCHROME P450 81F4                                                                 |
| JCVI_109   | 0.507      | highly similar to (541)AT4g31500  Symbols: ATR4, RNT1, SUR2, CYP83B1, SUPERROOT 2, ALTERED TRYPTOPHAN REGULATION 4, CYTOCHROME P450 83B1     |
| ES903348   | 0.506      | moderately similar to (242)AT1G18570  Symbols: HIG1, MYB51, MYB DOMAIN PROTEIN 51, HIGH INDOLIC GLUCOSINOLATE 1                              |
| JCVI_38759 | 0.471      | moderately similar to (251)AT1G18570  Symbols: HIG1, MYB51, MYB DOMAIN PROTEIN 51, HIGH INDOLIC GLUCOSINOLATE 1                              |
| JCVI_4650  | 0.439      | moderately similar to (398)AT4g31500  Symbols: ATR4, RNT1, SUR2, CYP83B1, SUPERROOT 2, ALTERED TRYPTOPHAN REGULATION 4, CYTOCHROME P450 83B1 |
| JCVI_32420 | 0.436      | weakly similar to (177)AT5G23010  Symbols: IMS3, MAM1   MAM1 (2-isopropylmalate synthase 3); 2-isopropylmalate synthase                      |
| JCVI_17153 | 0.371      | moderately similar to (204)AT1G18570  Symbols: HIG1, MYB51, MYB DOMAIN PROTEIN 51, HIGH INDOLIC GLUCOSINOLATE 1                              |
| JCVI_37074 | 0.357      | highly similar to (614)AT1g74100  Symbols: SOT16, ATST5A, ATST16, SULFOTRANSFERASE 16, ARABIDOPSIS SULFOTRANSFERASE 5A                       |
| CV432363   | 0.325      | highly similar to (183)AT1g74100  Symbols: SOT16, ATST5A, ATST16, SULFOTRANSFERASE 16, ARABIDOPSIS SULFOTRANSFERASE 5A                       |
| JCVI_35732 | 0.284      | weakly similar to (184)AT1g65880  Symbols: BZO1, BENZOYLOXYGLUCOSINOLATE 1                                                                   |
| JCVI_29531 | 0.279      | weakly similar to (147)AT2g25450  Symbols: AIGS-OH, encodes a protein whose sequence is similar to ACC oxidase                               |
| JCVI_37597 | 0.261      | weakly similar to (146)AT3G49680  Symbols: BCAT3   BCAT3 (BRANCHED-CHAIN AMINOTRANSFERASE3); catalytic/ methionine-oxo-acid transaminase     |
| JCVI_6128  | 0.255      | moderately similar to (276)AT2g31790  Symbols: UGT74C, UDP-GLUCOSYL TRANSFERASE                                                              |
| JCVI_7218  | 0.224      | moderately similar to (357)AT4G37410  Symbols: CYP81F4, CYTOCHROME P450 81F4                                                                 |
| JCVI_212   | 0.208      | moderately similar to (462)AT2g25450  Symbols: AIGS-OH, encodes a protein whose sequence is similar to ACC oxidase                           |
| EV048610   | 0.164      | weakly similar to (174)AT1g74090  Symbols: SOT18, ATST5B, ATST18, ARABIDOPSIS SULFOTRANSFERASE 5B                                            |
| EX092364   | 0.141      | moderately similar to (209)AT5G07700  Symbols: MYB76, MYB DOMAIN PROTEIN 76                                                                  |
| JCVI_15872 | 0.121      | moderately similar to (338)AT3G49680  Symbols: BCAT3   BCAT3 (BRANCHED-CHAIN AMINOTRANSFERASE3); catalytic/ methionine-oxo-acid transaminase |
| JCVI_28651 | 0.112      | highly similar to (136)AT1g65880  Symbols: BZO1, BENZOYLOXYGLUCOSINOLATE 1                                                                   |
| JCVI_14388 | 0.091      | moderately similar to (205)AT2g31790  Symbols: UGT74C, UDP-GLUCOSYL TRANSFERASE                                                              |
| JCVI_31655 | 0.075      | highly similar to (517)AT5G60890  Symbols: ATR1, MYB34, MYB DOMAIN PROTEIN 34, ALTERED TRYPTOPHAN REGULATION 1                               |
| EV172987   | 0.072      | moderately similar to (324)AT2g25450  Symbols: AIGS-OH, encodes a protein whose sequence is similar to ACC oxidase                           |
| CNT37571   | 0.059      | moderately similar to (372)AT1G12140  Symbols: FMO GS-OX5, FLAVIN-MONOOXYGENASE GLUCOSINOLATE S-OXYGENASE 5                                  |
| JCVI_3824  | 0.057      | highly similar to (522)AT1g74090  Symbols: SOT18, ATST5B, ATST18, ARABIDOPSIS SULFOTRANSFERASE 5B                                            |
| JCVI_32185 | 0.056      | moderately similar to (219)AT2g20610  Symbols: ALF1, RTY1, SUR1, ROOTY 1, SUPERROOT 1, ABERRANT LATERAL ROOT FORMATION 1                     |
| EV036453   | 0.056      | highly similar to (580)AT5g05260  Symbols: CYP79A2, CYTOCHROME P450 79A2                                                                     |
| JCVI_32618 | 0.048      | moderately similar to (213)AT5G23020  Symbols: MS2, MAM3, MAM-L (2-ISOPROPYLMALATE SYNTHASE 2, METHYLTHIOALKYLMALATE SYNTHASE-LIKE)          |
| EV121242   | 0.048      | moderately similar to (371)AT4G37410  Symbols: CYP81F4, CYTOCHROME P450 81F4                                                                 |
| JCVI_32659 | 0.047      | moderately similar to (325)AT5G57220  Symbols: CYP81F2, CYTOCHROME P450 81F2                                                                 |
| EV152669   | 0.032      | moderately similar to (254)AT5G57220  Symbols: CYP81F2, CYTOCHROME P450 81F2                                                                 |
| EV136236   | 0.030      | moderately similar to (244)AT1g65880  Symbols: BZO1, BENZOYLOXYGLUCOSINOLATE 1                                                               |
| JCVI_6034  | 0.028      | highly similar to (633)AT1g74100  Symbols: SOT16, ATST5A, ATST16, SULFOTRANSFERASE 16, ARABIDOPSIS SULFOTRANSFERASE 5A                       |
| JCVI_14950 | 0.024      | highly similar to (820)AT4g13770  Symbols: REF2, CYP83A1, REDUCED EPIDERMAL FLUORESCENCE 2, CYTOCHROME P450 83A1                             |
| JCVI_7952  | 0.018      | highly similar to (516)AT1g74090  Symbols: SOT18, ATST5B, ATST18, ARABIDOPSIS SULFOTRANSFERASE 5B                                            |
| EV042571   | 0.011      | weakly similar to (133)AT1g07640  Symbols: OBP2, a member of the DOF transcription factors                                                   |
| JCVI_24252 | -0.001     | highly similar to (585)AT5G57220  Symbols: CYP81F2, CYTOCHROME P450 81F2                                                                     |
| EV066556   | -0.009     | weakly similar to (127)AT1g65880  Symbols: BZO1, BENZOYLOXYGLUCOSINOLATE 1                                                                   |
| DY009740   | -0.015     | moderately similar to (249)AT5G23010  Symbols: IMS3, MAM1   MAM1 (2-isopropylmalate synthase 3); 2-isopropylmalate synthase                  |
| EV107979   | -0.016     | moderately similar to (223)AT1g24100  Symbols: UGT74B1, UDP-GLUCOSYL TRANSFERASE 74B1                                                        |
| JCVI_9709  | -0.023     | highly similar to (550)AT3G49680  Symbols: BCAT3   BCAT3 (BRANCHED-CHAIN AMINOTRANSFERASE3); catalytic/ methionine-oxo-acid transaminase     |
| DY009319   | -0.025     | moderately similar to (273)AT1G12140  Symbols: FMO GS-OX5, FLAVIN-MONOOXYGENASE GLUCOSINOLATE S-OXYGENASE 5                                  |
| JCVI_32569 | -0.026     | moderately similar to (315)AT1g07640  Symbols: OBP2, a member of the DOF transcription factors                                               |
| JCVI_19089 | -0.029     | moderately similar to (438)AT2g20610  Symbols: ALF1, RTY1, SUR1, ROOTY 1, SUPERROOT 1, ABERRANT LATERAL ROOT FORMATION 1                     |
| EV215478   | -0.033     | weakly similar to (126)AT1g07640  Symbols: OBP2, a member of the DOF transcription factors                                                   |
| JCVI_18356 | -0.033     | highly similar to (730)AT1G12140  Symbols: FMO GS-OX5, FLAVIN-MONOOXYGENASE GLUCOSINOLATE S-OXYGENASE 5                                      |
| EV166394   | -0.033     | moderately similar to (498)AT5G57220  Symbols: CYP81F2, CYTOCHROME P450 81F2                                                                 |
| JCVI_863   | -0.048     | moderately similar to (344)AT2g25450  Symbols: AIGS-OH, encodes a protein whose sequence is similar to ACC oxidase                           |
| JCVI_40856 | -0.055     | moderately similar to (401)AT2g20610  Symbols: ALF1, RTY1, SUR1, ROOTY 1, SUPERROOT 1, ABERRANT LATERAL ROOT FORMATION 1                     |
| ES901674   | -0.060     | weakly similar to (189)AT5G60890  Symbols: ATR1, MYB34, MYB DOMAIN PROTEIN 34, ALTERED TRYPTOPHAN REGULATION 1                               |
| ES948269   | -0.065     | weakly similar to (216)AT1g18590  Symbols: SOT17, ATST5C, ATST17, SULFOTRANSFERASE 17, ARABIDOPSIS SULFOTRANSFERASE 5C                       |
| JCVI_1293  | -0.065     | moderately similar to (397)AT2g25450  Symbols: AIGS-OH, encodes a protein whose sequence is similar to ACC oxidase                           |
| EX112446   | -0.068     | moderately similar to (399)AT2g20610  Symbols: ALF1, RTY1, SUR1, ROOTY 1, SUPERROOT 1, ABERRANT LATERAL ROOT FORMATION 1                     |
| EV226338   | -0.073     | moderately similar to (271)AT2g20610  Symbols: ALF1, RTY1, SUR1, ROOTY 1, SUPERROOT 1, ABERRANT LATERAL ROOT FORMATION 1                     |
| ES902202   | -0.074     | moderately similar to (251)AT5G60890  Symbols: ATR1, MYB34, MYB DOMAIN PROTEIN 34, ALTERED TRYPTOPHAN REGULATION 1                           |
| JCVI_37729 | -0.080     | highly similar to (539)AT1g18590  Symbols: SOT17, ATST5C, ATST17, SULFOTRANSFERASE 17, ARABIDOPSIS SULFOTRANSFERASE 5C                       |
| JCVI_31546 | -0.087     | moderately similar to (456)AT4G37410  Symbols: CYP81F4, CYTOCHROME P450 81F4                                                                 |
| JCVI_6517  | -0.094     | moderately similar to (331)AT5G07690  Symbols: MYB29, PMG2, MYB DOMAIN PROTEIN 29, PRODUCTION OF METHIONINE-DERIVED GLUCOSINOLATE 2          |
| EX059080   | -0.096     | moderately similar to (359)AT5G23010  Symbols: IMS3, MAM1   MAM1 (2-isopropylmalate synthase 3); 2-isopropylmalate synthase                  |
| JCVI_24441 | -0.109     | weakly similar to (173)AT5G61420  Symbols: MYB28, HAG1, MYB DOMAIN PROTEIN 28, HIGH ALIPHATIC GLUCOSINOLATE 1                                |
| JCVI_22996 | -0.113     | weakly similar to (229)AT1g74090  Symbols: SOT18, ATST5B, ATST18, ARABIDOPSIS SULFOTRANSFERASE 5B                                            |
| JCVI_36433 | -0.121     | weakly similar to (181)AT4G03060-CV1  Symbols: AOP2-CV1, ALKENYL HYDROXALKYL PRODUCING 2 - CAPE VERDE ISLANDS                                |
| JCVI_24921 | -0.125     | moderately similar to (346)AT1g74090  Symbols: SOT18, ATST5B, ATST18, ARABIDOPSIS SULFOTRANSFERASE 5B                                        |
| CD837066   | -0.141     | moderately similar to (383)AT2g31790  Symbols: UGT74C, UDP-GLUCOSYL TRANSFERASE                                                              |
| JCVI_19574 | -0.147     | weakly similar to (187)AT4G03050  Symbols: AOP3, the transcribed allele in ecotype Ler encodes a 2-oxoglutarate-dependent dioxygenase        |
| JCVI_19574 | -0.147     | weakly similar to (181)AT4G03060-CV1  Symbols: AOP2-CV1, ALKENYL HYDROXALKYL PRODUCING 2 - CAPE VERDE ISLANDS                                |
| DN961030   | -0.151     | moderately similar to (245)AT2g20610  Symbols: ALF1, RTY1, SUR1, ROOTY 1, SUPERROOT 1, ABERRANT LATERAL ROOT FORMATION 1                     |
| JCVI_14975 | -0.154     | moderately similar to (291)AT4G37410  Symbols: CYP81F4, CYTOCHROME P450 81F4                                                                 |
| JCVI_26799 | -0.160     | moderately similar to (438)AT4g13770  Symbols: REF2, CYP83A1, REDUCED EPIDERMAL FLUORESCENCE 2, CYTOCHROME P450 83A1                         |
| EX019177   | -0.188     | weakly similar to (147)AT5G23010  Symbols: IMS3, MAM1   MAM1 (2-isopropylmalate synthase 3); 2-isopropylmalate synthase                      |
| JCVI_12709 | -0.240     | moderately similar to (410)AT3G19710  Symbols: BCAT4   BCAT4 (BRANCHED-CHAIN AMINOTRANSFERASE4); catalytic/ methionine-oxo-acid transaminase |
| JCVI_31290 | -0.241     | moderately similar to (458)AT1g24100  Symbols: UGT74B1, UDP-GLUCOSYL TRANSFERASE 74B1                                                        |
| EE480029   | -0.280     | moderately similar to (293)AT1g74090  Symbols: SOT18, ATST5B, ATST18, ARABIDOPSIS SULFOTRANSFERASE 5B                                        |
| ES917650   | -0.285     | weakly similar to (122)AT5G23010  Symbols: IMS3, MAM1   MAM1 (2-isopropylmalate synthase 3); 2-isopropylmalate synthase                      |
| EX059882   | -0.301     | moderately similar to (368)AT2g31790  Symbols: UGT74C, UDP-GLUCOSYL TRANSFERASE                                                              |
| JCVI_39476 | -0.306     | moderately similar to (262)AT5G60890  Symbols: ATR1, MYB34, MYB DOMAIN PROTEIN 34, ALTERED TRYPTOPHAN REGULATION 1                           |
| JCVI_40221 | -0.307     | moderately similar to (400)AT1G12140  Symbols: FMO GS-OX5, FLAVIN-MONOOXYGENASE GLUCOSINOLATE S-OXYGENASE 5                                  |
| JCVI_5227  | -0.346     | moderately similar to (384)AT1G62540  Symbols: FMO GS-OX2, FLAVIN-MONOOXYGENASE GLUCOSINOLATE S-OXYGENASE 2                                  |
| JCVI_32160 | -0.421     | moderately similar to (316)AT1g74090  Symbols: SOT18, ATST5B, ATST18, ARABIDOPSIS SULFOTRANSFERASE 5B                                        |
| JCVI_33924 | -0.427     | moderately similar to (464)AT5G60890  Symbols: ATR1, MYB34, MYB DOMAIN PROTEIN 34, ALTERED TRYPTOPHAN REGULATION 1                           |
| JCVI_2638  | -0.535     | moderately similar to (431)AT3G49680  Symbols: BCAT3   BCAT3 (BRANCHED-CHAIN AMINOTRANSFERASE3); catalytic/ methionine-oxo-acid transaminase |
| JCVI_40613 | -0.554     | moderately similar to (445)AT5G07690  Symbols: MYB29, PMG2, MYB DOMAIN PROTEIN 29, PRODUCTION OF METHIONINE-DERIVED GLUCOSINOLATE 2          |
| EE468053   | -0.583     | moderately similar to (241)AT1g74090  Symbols: SOT18, ATST5B, ATST18, ARABIDOPSIS SULFOTRANSFERASE 5B                                        |
| JCVI_17243 | -0.591     | moderately similar to (354)AT1g74090  Symbols: SOT18, ATST5B, ATST18, ARABIDOPSIS SULFOTRANSFERASE 5B                                        |
| JCVI_15640 | -0.599     | weakly similar to (197)AT1G65880  Symbols: FMO GS-OX1, FLAVIN-MONOOXYGENASE GLUCOSINOLATE S-OXYGENASE 1                                      |
| JCVI_5112  | -0.652     | moderately similar to (434)AT4g13770  Symbols: REF2, CYP83A1, REDUCED EPIDERMAL FLUORESCENCE 2, CYTOCHROME P450 83A1                         |
| EX043693   | -0.755     | moderately similar to (200)AT5G07690  Symbols: MYB29, PMG2, MYB DOMAIN PROTEIN 29, PRODUCTION OF METHIONINE-DERIVED GLUCOSINOLATE 2          |
| JCVI_33047 | -0.886     | moderately similar to (324)AT4G03060-CV1  Symbols: AOP2-CV1, ALKENYL HYDROXALKYL PRODUCING 2 - CAPE VERDE ISLANDS                            |
| JCVI_17335 | -0.970     | moderately similar to (351)AT1g16410  Symbols: BUS1, SPS1, BUSHY 1, CYP79F1, SUPERSHOOT 1, CYTOCHROME P450 79F1                              |
| JCVI_6771  | -1.217     | highly similar to (726)AT2g31790  Symbols: UGT74C, UDP-GLUCOSYL TRANSFERASE                                                                  |
| JCVI_9973  | -1.237     | moderately similar to (297)AT2g25450  Symbols: AIGS-OH, encodes a protein whose sequence is similar to ACC oxidase                           |
| JCVI_18213 | -1.479     | highly similar to (565)AT3G19710  Symbols: BCAT4   BCAT4 (BRANCHED-CHAIN AMINOTRANSFERASE4); catalytic/ methionine-oxo-acid transaminase     |
| EE401951   | -1.770     | weakly similar to (197)AT5G23010  Symbols: IMS3, MAM1   MAM1 (2-isopropylmalate synthase 3); 2-isopropylmalate synthase                      |
| EX066879   | -1.873     | very highly similar to (84)AT1g16410  Symbols: BUS1, SPS1, BUSHY 1, CYP79F1, SUPERSHOOT 1, CYTOCHROME P450 79F1                              |
| JCVI_30455 | -1.881     | highly similar to (519)AT5G23020  Symbols: MS2, MAM3, MAM-L (2-ISOPROPYLMALATE SYNTHASE 2, METHYLTHIOALKYLMALATE SYNTHASE-LIKE)              |
| JCVI_34763 | -2.296     | weakly similar to (187)AT3G19710  Symbols: BCAT4   BCAT4 (BRANCHED-CHAIN AMINOTRANSFERASE4); catalytic/ methionine-oxo-acid transaminase     |

| Identifier | UV-control | Isoprenoids - Description                                                                                                                                          |
|------------|------------|--------------------------------------------------------------------------------------------------------------------------------------------------------------------|
| jvci_20479 | 4.728      | moderately similar to (328)AT1G64970  Symbols: TMT1, VTE4, G-TMT   G-TMT (GAMMA-TOCOPHEROL METHYLTRANSFERASE)                                                      |
| jvci_2005  | 1.409      | moderately similar to (218)AT1G74470  Symbols:   geranylgeranyl reductase                                                                                          |
| jvci_4210  | 1.388      | moderately similar to (488)AT2G26930  Symbols: PDE27, ISPE, ATCDPMK   PIGMENT DEFECTIVE 277; 4-(cytidine 5'-diphospho)-2-C-methyl-D-erythritol kinase              |
| jvci_9534  | 1.067      | highly similar to (795)AT4G34350  Symbols: ISPH, CLB6   CLB6 (CHLOROPLAST BIOGENESIS 6); 4-hydroxy-3-methylbut-2-en-1-yl diphosphate reductase                     |
| jvci_5099  | 0.871      | weakly similar to (116)AT1G78955  Symbols: CAMS1   CAMS1 (CAMELLIOL C SYNTHASE 1); beta-amyrin synthase                                                            |
| jvci_2706  | 0.833      | moderately similar to (355)AT5G17230  Symbols: PSY   PSY (PHYTOENE SYNTHASE)                                                                                       |
| jvci_14575 | 0.631      | highly similar to (506)AT5G57030  Symbols: LUT2   LUT2 (LUTEIN DEFICIENT 2); lycopene epsilon cyclase                                                              |
| jvci_14396 | 0.602      | moderately similar to (369)AT3G05500  Symbols:   rubber elongation factor (REF) family protein                                                                     |
| jvci_29126 | 0.587      | highly similar to (521)AT1G78510  Symbols: SPS1   SPS1 (SOLANESYL DIPHOSPHATE SYNTHASE 1)                                                                          |
| jvci_8419  | 0.563      | moderately similar to (348)AT3G54250  Symbols:   mevalonate diphosphate decarboxylase, putative                                                                    |
| jvci_5261  | 0.546      | moderately similar to (424)AT4G25700  Symbols: B1, CHY1, BETA-OHASE 1   BETA-OHASE 1 (BETA-HYDROXYLASE 1)                                                          |
| jvci_11442 | 0.536      | highly similar to (585)AT5G48230  Symbols: EMB1276, ACAT2   ACAT2/EMB1276 (ACETOACETYL-COA THIOLEASE 2); acetyl-CoA C-acetyltransferase                            |
| jvci_36369 | 0.528      | weakly similar to (155)AT1G08500  Symbols: AVDE1   NPQ1 (NON-PHOTOCHEMICAL QUENCHING 1)                                                                            |
| ev128620   | 0.509      | moderately similar to (344)AT5G62790  Symbols: PDE129, DXR   DXR (1-DEOXY-D-XYLULOSE 5-PHOSPHATE REDUCTOISOMERASE)                                                 |
| ei592527   | 0.470      | weakly similar to (155)AT3G02780  Symbols: IPP2, IPIAT1, IDI2   IDI2/IPIAT1/IPP2 (ISOPENTENYL DIPHOSPHATE ISOMERASE 2)                                             |
| jvci_36090 | 0.466      | moderately similar to (461)AT2G02500  Symbols: ATMEPCT, MCT, ISPD   ISPD (2-C-METHYL-D-ERYTHRITOL 4-PHOSPHATE CYTIIDYLTRANSFERASE)                                 |
| jvci_156   | 0.463      | moderately similar to (341)AT2G47780  Symbols:   terpene elongation factor (REF) protein-related                                                                   |
| jvci_27803 | 0.447      | moderately similar to (281)AT2G24210  Symbols: TPS10   TPS10 (TERPENE SYNTHASE 10); myrcene/(E)-beta-ocimene synthase                                              |
| jvci_3310  | 0.442      | moderately similar to (328)AT3G02780  Symbols: IPP2, IPIAT1, IDI2   IDI2/IPIAT1/IPP2 (ISOPENTENYL DIPHOSPHATE ISOMERASE 2)                                         |
| jvci_12969 | 0.371      | moderately similar to (351)AT5G17230  Symbols: PSY   PSY (PHYTOENE SYNTHASE)                                                                                       |
| jvci_29425 | 0.362      | highly similar to (623)AT1G06820  Symbols: CCR2, CRTISO   CRTISO (CAROTENOID ISOMERASE); carotenoid isomerase                                                      |
| dy023560   | 0.347      | moderately similar to (404)AT2G17570  Symbols:   undecaprenyl pyrophosphate synthetase family protein / UPP synthetase family protein                              |
| jvci_37079 | 0.346      | highly similar to (624)AT3G11945  Symbols: ATHST   ATHST; prenyltransferase                                                                                        |
| jvci_33771 | 0.320      | moderately similar to (496)AT5G27450  Symbols: MVK, MK   MK/MVK; mevalonate kinase                                                                                 |
| jvci_22503 | 0.311      | highly similar to (592)AT2G24210  Symbols: TPS10   TPS10 (TERPENE SYNTHASE 10); myrcene/(E)-beta-ocimene synthase                                                  |
| jvci_11039 | 0.298      | moderately similar to (263)AT5G17230  Symbols: PSY   PSY (PHYTOENE SYNTHASE)                                                                                       |
| ex086464   | 0.278      | moderately similar to (395)AT5G52570  Symbols: B2, CHY2, BETA-OHASE 2   BETA-OHASE 2 (BETA-CAROTENE HYDROXYLASE 2)                                                 |
| jvci_12663 | 0.277      | moderately similar to (447)AT1G76490  Symbols: HMGR1, HMG1   HMG1 (3-HYDROXY-3-METHYLGLUTARYL COA REDUCTASE)                                                       |
| ex137163   | 0.276      | moderately similar to (306)AT5G44630  Symbols:   terpene synthase/cyclase family protein                                                                           |
| jvci_28866 | 0.256      | moderately similar to (315)AT3G54250  Symbols:   mevalonate diphosphate decarboxylase, putative                                                                    |
| jvci_25775 | 0.252      | highly similar to (531)AT5G47770  Symbols: FSP1   FSP1 (FARNESYL DIPHOSPHATE SYNTHASE 1); dimethylallyltransferase/geranyltransferase                              |
| jvci_25537 | 0.232      | highly similar to (595)AT4G24490  Symbols:   protein binding / protein prenyltransferase                                                                           |
| jvci_24842 | 0.230      | moderately similar to (239)AT5G57030  Symbols: LUT2   LUT2 (LUTEIN DEFICIENT 2); lycopene epsilon cyclase                                                          |
| jvci_19477 | 0.229      | highly similar to (527)AT5G12210  Symbols:   geranylgeranyl transferase type II beta subunit, putative / RAB geranylgeranyltransferase beta subunit, putative      |
| jvci_3655  | 0.224      | moderately similar to (302)AT1G31910  Symbols:   GHMP kinase family protein                                                                                        |
| jvci_38872 | 0.215      | moderately similar to (350)AT3G54250  Symbols:   mevalonate diphosphate decarboxylase, putative                                                                    |
| jvci_3137  | 0.214      | moderately similar to (439)AT1G76490  Symbols: HMGR1, HMG1   HMG1 (3-HYDROXY-3-METHYLGLUTARYL COA REDUCTASE)                                                       |
| jvci_34321 | 0.212      | weakly similar to (168)AT4G16740  Symbols: ATTPS03   ATTPS03 (Arabidopsis thaliana terpene synthase 03)                                                            |
| jvci_4212  | 0.211      | highly similar to (597)AT1G79460  Symbols: KS, ATKS, GA2   GA2 (GA REQUIRING 2); ent-kaurene synthase                                                              |
| jvci_5891  | 0.198      | moderately similar to (328)AT1G63970  Symbols: MECPS, ISPF   ISPF (Homolog of E. coli ispF (isoprenoids F)); 2-C-methyl-D-erythritol 2,4-cyclodiphosphate synthase |
| jvci_4351  | 0.195      | moderately similar to (343)AT4G36810  Symbols: GGPS1   GGPS1 (GERANYLPYROPHOSPHATE SYNTHASE 1); farnesyltransferase                                                |
| ee427949   | 0.194      | moderately similar to (289)AT4G20200  Symbols:   terpene synthase/cyclase family protein                                                                           |
| ee518275   | 0.182      | moderately similar to (411)AT2G07050  Symbols: CAS1   CAS1 (CYCLOARTENOL SYNTHASE 1); cycloartenol synthase                                                        |
| jvci_38479 | 0.177      | moderately similar to (447)AT3G63410  Symbols: VTE3, APG1   APG1 (ALBINO OR PALE GREEN MUTANT 1); methyltransferase                                                |
| ev101195   | 0.167      | moderately similar to (252)AT1G74470  Symbols:   geranylgeranyl reductase                                                                                          |
| dy021078   | 0.154      | moderately similar to (232)AT1G76490  Symbols: HMGR1, HMG1   HMG1 (3-HYDROXY-3-METHYLGLUTARYL COA REDUCTASE)                                                       |
| jvci_18225 | 0.148      | moderately similar to (399)AT4G15560  Symbols: DEF, CLA, DXS, DXPS2, CLA1   CLA1 (CLOROPLASTOS ALTERADOS 1)                                                        |
| jvci_17595 | 0.147      | weakly similar to (125)AT1G06570  Symbols: HPD, PDS1   PDS1 (PHYTOENE DESATURATION 1)                                                                              |
| jvci_3377  | 0.144      | weakly similar to (141)AT5G60600  Symbols: ISPG, CSB3, CLB4, GcpE   GcpE (CHLOROPLAST BIOGENESIS 4)                                                                |
| jvci_27449 | 0.139      | highly similar to (885)AT4G15560  Symbols: DEF, CLA, DXS, DXPS2, CLA1   CLA1 (CLOROPLASTOS ALTERADOS 1)                                                            |
| ev165777   | 0.137      | moderately similar to (201)AT4G20200  Symbols:   terpene synthase/cyclase family protein                                                                           |
| ex103290   | 0.132      | weakly similar to (105)AT5G57030  Symbols: LUT2   LUT2 (LUTEIN DEFICIENT 2); lycopene epsilon cyclase                                                              |
| jvci_10823 | 0.131      | highly similar to (685)AT1G17050  Symbols: SPS2   SPS2 (SOLANESYL DIPHOSPHATE SYNTHASE 2); dimethylallyltransferase/trans-octaprenyltransferase                    |
| jvci_18605 | 0.130      | highly similar to (568)AT4G34350  Symbols: ISPH, CLB6   CLB6 (CHLOROPLAST BIOGENESIS 6); 4-hydroxy-3-methylbut-2-en-1-yl diphosphate reductase                     |
| jvci_39154 | 0.130      | moderately similar to (353)AT2G17370  Symbols: HMGR2, HMG2   HMG2 (3-HYDROXY-3-METHYLGLUTARYL-COA REDUCTASE 2)                                                     |
| jvci_41100 | 0.126      | weakly similar to (184)AT5G48230  Symbols: EMB1276, ACAT2   ACAT2/EMB1276 (ACETOACETYL-COA THIOLEASE 2); acetyl-CoA C-acetyltransferase                            |
| jvci_29560 | 0.120      | highly similar to (561)AT1G78960  Symbols: ATLUP2   ATLUP2 (Arabidopsis thaliana lupeol synthase 2); lupeol synthase                                               |
| ex039035   | 0.112      | weakly similar to (159)AT1G60600  Symbols: ABC4   ABC4 (ABERRANT CHLOROPLAST DEVELOPMENT 4)                                                                        |
| jvci_34157 | 0.110      | moderately similar to (383)AT5G36160  Symbols:   aminotransferase-related                                                                                          |
| jvci_3911  | 0.102      | moderately similar to (464)AT4G25700  Symbols: B1, CHY1, BETA-OHASE 1   BETA-OHASE 1 (BETA-HYDROXYLASE 1)                                                          |
| jvci_6367  | 0.097      | weakly similar to (182)AT1G76490  Symbols: HMGR1, HMG1   HMG1 (3-HYDROXY-3-METHYLGLUTARYL COA REDUCTASE)                                                           |
| jvci_12963 | 0.079      | weakly similar to (108)AT1G61120  Symbols:   terpene synthase/cyclase family protein                                                                               |
| jvci_35093 | 0.076      | moderately similar to (417)AT5G16440  Symbols: IPP1, IDI1   IPP1 (ISOPENTENYL DIPHOSPHATE ISOMERASE 1); isopentenyl-diphosphate delta-isomerase                    |
| jvci_19174 | 0.076      | highly similar to (691)AT5G42500  Symbols:   mevalonate diphosphate decarboxylase, putative                                                                        |
| ev148909   | 0.074      | moderately similar to (221)AT1G78955  Symbols: CAMS1   CAMS1 (CAMELLIOL C SYNTHASE 1); beta-amyrin synthase                                                        |
| jvci_34730 | 0.071      | weakly similar to (102)AT3G10230  Symbols: LYC   LYC (LYCOPENE CYCLASE)                                                                                            |
| ex097077   | 0.068      | moderately similar to (292)AT3G29110  Symbols:   terpene synthase/cyclase family protein                                                                           |
| cv545646   | 0.064      | weakly similar to (120)AT1G76490  Symbols: HMGR1, HMG1   HMG1 (3-HYDROXY-3-METHYLGLUTARYL COA REDUCTASE)                                                           |
| ex041264   | 0.063      | moderately similar to (185)AT1G78955  Symbols: CAMS1   CAMS1 (CAMELLIOL C SYNTHASE 1); beta-amyrin synthase                                                        |
| jvci_20625 | 0.054      | highly similar to (714)AT2G07050  Symbols: CAS1   CAS1 (CYCLOARTENOL SYNTHASE 1); cycloartenol synthase                                                            |
| jvci_32699 | 0.051      | moderately similar to (224)AT5G62790  Symbols: PDE129, DXR   DXR (1-DEOXY-D-XYLULOSE 5-PHOSPHATE REDUCTOISOMERASE)                                                 |
| jvci_12214 | 0.050      | weakly similar to (106)AT2G34630  Symbols: GGPS, GPS1   GGPS/GPS1 (GERANYLPYROPHOSPHATE SYNTHASE); dimethylallyltransferase                                        |
| jvci_12014 | 0.048      | weakly similar to (130)AT5G23960  Symbols:   terpene synthase/cyclase family protein                                                                               |
| jvci_11281 | 0.038      | moderately similar to (331)AT1G06570  Symbols: HPD, PDS1   PDS1 (PHYTOENE DESATURATION 1)                                                                          |
| ev214032   | 0.034      | weakly similar to (127)AT4G34350  Symbols: ISPH, CLB6   CLB6 (CHLOROPLAST BIOGENESIS 6); 4-hydroxy-3-methylbut-2-en-1-yl diphosphate reductase                     |
| ev009533   | 0.032      | moderately similar to (257)AT2G18620  Symbols:   geranylgeranyl pyrophosphate synthetase, putative / GGPP synthetase, putative / farnesyltransferase, putative     |
| ev097529   | 0.030      | weakly similar to (179)AT4G15560  Symbols: DEF, CLA, DXS, DXPS2, CLA1   CLA1 (CLOROPLASTOS ALTERADOS 1)                                                            |
| es913880   | 0.028      | moderately similar to (215)AT3G25830  Symbols: ATTPS-CIN   ATTPS-CIN (TERPENE SYNTHASE-LIKE SEQUENCE-1.8-CINEOLE); myrcene/(E)-beta-ocimene synthase               |
| ee403740   | 0.026      | weakly similar to (181)AT1G63970  Symbols: MECPS, ISPF   ISPF (Homolog of E. coli ispF (isoprenoids F)); 2-C-methyl-D-erythritol 2,4-cyclodiphosphate synthase     |
| ev177417   | 0.025      | moderately similar to (431)AT5G62790  Symbols: PDE129, DXR   DXR (1-DEOXY-D-XYLULOSE 5-PHOSPHATE REDUCTOISOMERASE)                                                 |
| jvci_9314  | 0.025      | moderately similar to (334)AT1G76490  Symbols: HMGR1, HMG1   HMG1 (3-HYDROXY-3-METHYLGLUTARYL COA REDUCTASE)                                                       |
| ee532266   | 0.021      | moderately similar to (305)AT3G14490  Symbols:   terpene synthase/cyclase family protein                                                                           |
| jvci_25321 | 0.018      | moderately similar to (215)AT1G06560  Symbols:   NOL1/NOP2/sun family protein                                                                                      |
| ee509744   | 0.016      | weakly similar to (188)AT1G78960  Symbols: ATLUP2   ATLUP2 (Arabidopsis thaliana lupeol synthase 2); lupeol synthase                                               |
| ev124192   | 0.015      | weakly similar to (116)AT4G23590  Symbols:   aminotransferase class I and II family protein                                                                        |
| jvci_35581 | 0.013      | highly similar to (572)AT5G27450  Symbols: MVK, MK   MK/MVK; mevalonate kinase                                                                                     |
| es860774   | 0.012      | weakly similar to (114)AT2G18620  Symbols:   geranylgeranyl pyrophosphate synthetase, putative / GGPP synthetase, putative / farnesyltransferase, putative         |
| jvci_10559 | 0.009      | weakly similar to (117)AT5G57030  Symbols: LUT2   LUT2 (LUTEIN DEFICIENT 2); lycopene epsilon cyclase                                                              |
| jvci_29716 | 0.008      | weakly similar to (105)AT5G17230  Symbols: PSY   PSY (PHYTOENE SYNTHASE)                                                                                           |
| ev133412   | 0.007      | moderately similar to (290)AT4G24490  Symbols:   protein binding / protein prenyltransferase                                                                       |
| cx196105   | 0.005      | moderately similar to (382)AT3G11950  Symbols:   homogenitase farnesyltransferase / homogenitase geranyltransferase / homogenitase solanesyltransferase            |
| ev186096   | 0.000      | weakly similar to (166)AT4G14210  Symbols: PDS, PDE226, PDS3   PDS3 (PHYTOENE DESATURASE)                                                                          |
| jvci_2997  | -0.001     | moderately similar to (353)AT1G78955  Symbols: CAMS1   CAMS1 (CAMELLIOL C SYNTHASE 1); beta-amyrin synthase                                                        |
| jvci_27349 | -0.001     | moderately similar to (133)AT3G29410  Symbols:   terpene synthase/cyclase family protein                                                                           |
| jvci_17063 | -0.004     | highly similar to (502)AT1G60600  Symbols: ABC4   ABC4 (ABERRANT CHLOROPLAST DEVELOPMENT 4)                                                                        |
| es903218   | -0.006     | moderately similar to (409)AT3G25830  Symbols: ATTPS-CIN   ATTPS-CIN (TERPENE SYNTHASE-LIKE SEQUENCE-1.8-CINEOLE); myrcene/(E)-beta-ocimene synthase               |
| jvci_18484 | -0.009     | moderately similar to (347)AT5G58784  Symbols:   dehydrodicholyl diphosphate synthase, putative / DEDOL-PP synthase, putative                                      |
| jvci_26262 | -0.010     | moderately similar to (405)AT5G23960  Symbols:   terpene synthase/cyclase family protein                                                                           |
| es952658   | -0.011     | weakly similar to (156)AT2G17570  Symbols:   undecaprenyl pyrophosphate synthetase family protein / UPP synthetase family protein                                  |
| dy028331   | -0.012     | moderately similar to (281)AT5G49555  Symbols:   amine oxidase-related                                                                                             |
| dy004458   | -0.012     | moderately similar to (308)AT4G20200  Symbols:   terpene synthase/cyclase family protein                                                                           |
| jvci_1694  | -0.013     | weakly similar to (163)AT2G34630  Symbols: GGPS, GPS1   GGPS/GPS1 (GERANYLPYROPHOSPHATE SYNTHASE); dimethylallyltransferase                                        |
| ee471142   | -0.014     | weakly similar to (168)AT3G25830  Symbols: ATTPS-CIN   ATTPS-CIN (TERPENE SYNTHASE-LIKE SEQUENCE-1.8-CINEOLE); myrcene/(E)-beta-ocimene synthase                   |
| ev165861   | -0.015     | moderately similar to (273)AT3G29110  Symbols:   terpene synthase/cyclase family protein                                                                           |
| jvci_23316 | -0.016     | moderately similar to (416)AT1G78500  Symbols:   pentacyclic triterpene synthase, putative                                                                         |
| jvci_2752  | -0.017     | moderately similar to (288)AT4G11820  Symbols: HMGS, EMB2778, MVA1   MVA1 (HYDROXYMETHYLGLUTARYL-COA SYNTHASE)                                                     |
| jvci_40121 | -0.020     | moderately similar to (228)AT5G57030  Symbols: LUT2   LUT2 (LUTEIN DEFICIENT 2); lycopene epsilon cyclase                                                          |
| jvci_31309 | -0.022     | highly similar to (823)AT4G14210  Symbols: PDS, PDE226, PDS3   PDS3 (PHYTOENE DESATURASE)                                                                          |
| jvci_21434 | -0.024     | moderately similar to (255)AT5G57030  Symbols: LUT2   LUT2 (LUTEIN DEFICIENT 2); lycopene epsilon cyclase                                                          |
| jvci_24718 | -0.027     | moderately similar to (225)AT5G12210  Symbols:   geranylgeranyl transferase type II beta subunit, putative / RAB geranylgeranyltransferase beta subunit, putative  |
| es906255   | -0.028     | moderately similar to (259)AT5G60600  Symbols: ISPG, CSB3, CLB4, GcpE   GcpE (CHLOROPLAST BIOGENESIS 4)                                                            |
| ev214637   | -0.029     | weakly similar to (149)AT1G74470  Symbols:   geranylgeranyl reductase                                                                                              |
| ex137765   | -0.032     | weakly similar to (173)AT5G44630  Symbols:   terpene synthase/cyclase family protein                                                                               |
| ex092640   | -0.036     | weakly similar to (103)AT1G78960  Symbols: ATLUP2   ATLUP2 (Arabidopsis thaliana lupeol synthase 2); lupeol synthase                                               |
| jvci_15620 | -0.043     | moderately similar to (416)AT4G32770  Symbols: ATSDX1, VTE1   VTE1 (VITAMIN E DEFICIENT 1)                                                                         |
| ee422476   | -0.046     | weakly similar to (139)AT4G20200  Symbols:   terpene synthase/cyclase family protein                                                                               |

|             |        |                                       |                                                                                                                                           |
|-------------|--------|---------------------------------------|-------------------------------------------------------------------------------------------------------------------------------------------|
| cd827634    | -0.046 | weakly similar to ( 140)AT2G18640     | Symbols: GGPS4   GGPS4 (GERANYLGERANYL PYROPHOSPHATE SYNTHASE 4); farnesyltransferase                                                     |
| cd834687    | -0.048 | moderately similar to ( 229)AT1G48800 | Symbols:   terpene synthase/cyclase family protein                                                                                        |
| ex106389    | -0.048 | weakly similar to ( 105)AT5G57030     | Symbols: LUT2   LUT2 (LUTEIN DEFICIENT 2); lycopene epsilon cyclase                                                                       |
| ev218406    | -0.050 | moderately similar to ( 405)AT2G18950 | Symbols: TPT1, ATHPT, HPT, VTE2, HPT1   HPT1 (HOMOGENITISATE PHYTYLTRANSFERASE 1); prenilyltransferase                                    |
| ex097042    | -0.050 | moderately similar to ( 305)AT1G76490 | Symbols: HMG1   HMG1 (3-HYDROXY-3-METHYLGLUTARYL COA REDUCTASE)                                                                           |
| jcvi_12917  | -0.052 | moderately similar to ( 452)AT2G34630 | Symbols: GPPS, GPS1   GPPS/GPS1 (GERANYLPYROPHOSPHATE SYNTHASE); dimethylallyltransferase                                                 |
| ee517739    | -0.052 | moderately similar to ( 219)AT2G26930 | Symbols: PDE226, PDS3   PDE226, PDS3 (1-DEOXY-D-XYLULOSE 5-PHOSPHATE SYNTHASE 3); 4-(cytidine 5-diphospho)-2-C-methyl-D-erythritol kinase |
| ev120968    | -0.054 | moderately similar to ( 274)AT4G15870 | Symbols: ATTS1   ATTS1 (Arabidopsis thaliana terpene synthase 1); lyase/magnesium ion binding                                             |
| jcvi_961    | -0.058 | moderately similar to ( 341)AT1G74470 | Symbols:   geranylgeranyl reductase                                                                                                       |
| jcvi_1053   | -0.058 | moderately similar to ( 204)AT3G63520 | Symbols: ATCCD1, ATNCED1, NCED1, CCD1   CCD1 (CAROTENOID CLEAVAGE DIOXYGENASE 1)                                                          |
| ev225118    | -0.060 | moderately similar to ( 222)AT3G25810 | Symbols:   myrcene/ocimene synthase, putative                                                                                             |
| cd835924    | -0.061 | moderately similar to ( 288)AT4G20230 | Symbols:   terpene synthase/cyclase family protein                                                                                        |
| cd836704    | -0.062 | moderately similar to ( 363)AT5G11380 | Symbols: DXPS3   DXPS3 (1-DEOXY-D-XYLULOSE 5-PHOSPHATE SYNTHASE 3)                                                                        |
| jcvi_28404  | -0.064 | moderately similar to ( 287)AT2G26250 | Symbols: FDH   FDH (FIDDLEHEAD); acyltransferase                                                                                          |
| jcvi_33856  | -0.067 | moderately similar to ( 454)AT2G07050 | Symbols: CAS1   CAS1 (CYCLOARTENOL SYNTHASE 1); cycloartenol synthase                                                                     |
| ev189544    | -0.068 | weakly similar to ( 163)AT1G74470     | Symbols:   geranylgeranyl reductase                                                                                                       |
| jcvi_18575  | -0.071 | moderately similar to ( 389)AT3G25830 | Symbols: ATTPS-CIN   ATTPS-CIN (TERPENE SYNTHASE-LIKE SEQUENCE-1,8-CINEOLE); myrcene/(E)-beta-ocimene synthase                            |
| es906763    | -0.073 | moderately similar to ( 377)AT3G29110 | Symbols:   terpene synthase/cyclase family protein                                                                                        |
| jcvi_26986  | -0.073 | moderately similar to ( 395)AT4G15560 | Symbols: DEF, CLA, DXS, DXPS2, CLA1   CLA1 (CLOROPLASTOS ALTERADOS 1)                                                                     |
| ev193301    | -0.079 | moderately similar to ( 289)AT4G14210 | Symbols: PDS, PDE226, PDS3   PDS3 (PHYTOENE DESATURASE)                                                                                   |
| jcvi_42043  | -0.084 | weakly similar to ( 138)AT1G50890     | Symbols:   binding                                                                                                                        |
| ev197471    | -0.087 | weakly similar to ( 163)AT5G17230     | Symbols: PSY   PSY (PHYTOENE SYNTHASE)                                                                                                    |
| cx193227    | -0.088 | weakly similar to ( 111)AT5G23960     | Symbols:   terpene synthase/cyclase family protein                                                                                        |
| jcvi_40299  | -0.089 | weakly similar to ( 161)AT1G61120     | Symbols:   terpene synthase/cyclase family protein                                                                                        |
| ev209368    | -0.091 | moderately similar to ( 228)AT5G60600 | Symbols: ISPG, CSB3, CLB4, GcpE   GcpE (CHLOROPLAST BIOGENESIS 4)                                                                         |
| jcvi_40815  | -0.093 | moderately similar to ( 429)AT5G11380 | Symbols: DXPS3   DXPS3 (1-DEOXY-D-XYLULOSE 5-PHOSPHATE SYNTHASE 3)                                                                        |
| jcvi_123    | -0.094 | highly similar to ( 655)AT1G74470     | Symbols:   geranylgeranyl reductase                                                                                                       |
| cd819976    | -0.095 | moderately similar to ( 260)AT3G11950 | Symbols:   homogenitise farnesyltransferase/ homogenitise geranylgeranyltransferase/ homogenitise solanesyltransferase                    |
| jcvi_27069  | -0.097 | moderately similar to ( 249)AT5G23960 | Symbols:   terpene synthase/cyclase family protein                                                                                        |
| jcvi_39823  | -0.097 | weakly similar to ( 144)AT1G66020     | Symbols:   terpene synthase/cyclase family protein                                                                                        |
| jcvi_25994  | -0.100 | moderately similar to ( 285)AT4G15870 | Symbols: ATTS1   ATTS1 (Arabidopsis thaliana terpene synthase 1); lyase/magnesium ion binding                                             |
| jcvi_39717  | -0.101 | moderately similar to ( 291)AT2G23800 | Symbols: GGPS5, GGPS2   GGPS2 (GERANYLGERANYL PYROPHOSPHATE SYNTHASE 2); farnesyltransferase                                              |
| ex086652    | -0.104 | weakly similar to ( 116)AT3G25830     | Symbols: ATTPS-CIN   ATTPS-CIN (TERPENE SYNTHASE-LIKE SEQUENCE-1,8-CINEOLE); myrcene/(E)-beta-ocimene synthase                            |
| jcvi_14579  | -0.109 | moderately similar to ( 427)AT2G23800 | Symbols: GGPS5, GGPS2   GGPS2 (GERANYLGERANYL PYROPHOSPHATE SYNTHASE 2); farnesyltransferase                                              |
| jcvi_17388  | -0.109 | moderately similar to ( 288)AT4G14210 | Symbols: PDS, PDE226, PDS3   PDS3 (PHYTOENE DESATURASE)                                                                                   |
| jcvi_2950   | -0.110 | weakly similar to ( 194)AT4G11820     | Symbols: HMGS, MVA1   MVA1 (HYDROXYMETHYLGLUTARYL-COA SYNTHASE)                                                                           |
| jcvi_42543  | -0.110 | moderately similar to ( 483)AT1G78960 | Symbols: ATLUP2   ATLUP2 (Arabidopsis thaliana lupeol synthase 2); lupeol synthase                                                        |
| ev178595    | -0.111 | moderately similar to ( 218)AT4G36810 | Symbols: GGP51   GGP51 (GERANYLGERANYL PYROPHOSPHATE SYNTHASE 1); farnesyltransferase                                                     |
| jcvi_2410   | -0.111 | moderately similar to ( 293)AT4G16740 | Symbols: ATTPS03   ATTPS03 (Arabidopsis thaliana terpene synthase 03)                                                                     |
| jcvi_16311  | -0.113 | moderately similar to ( 324)AT1G08550 | Symbols: AVDE1   NPO1 (NON-PHOTOCHEMICAL QUENCHING 1)                                                                                     |
| es97679     | -0.117 | weakly similar to ( 102)AT5G27450     | Symbols: MVK, MK   MK/MVK; mevalonate kinase                                                                                              |
| ev206464    | -0.117 | moderately similar to ( 308)AT1G06570 | Symbols: HPD, PDS1   PDS1 (PHYTOENE DESATURATION 1)                                                                                       |
| jcvi_18580  | -0.125 | moderately similar to ( 222)AT5G57030 | Symbols: LUT2   LUT2 (LUTEIN DEFICIENT 2); lycopene epsilon cyclase                                                                       |
| jcvi_32269  | -0.127 | moderately similar to ( 447)AT1G06570 | Symbols: HPD, PDS1   PDS1 (PHYTOENE DESATURATION 1)                                                                                       |
| ev078086    | -0.127 | weakly similar to ( 157)AT4G14210     | Symbols: PDS, PDE226, PDS3   PDS3 (PHYTOENE DESATURASE)                                                                                   |
| am060327    | -0.130 | weakly similar to ( 195)AT3G11950     | Symbols:   homogenitise farnesyltransferase/ homogenitise geranylgeranyltransferase/ homogenitise solanesyltransferase                    |
| es935671    | -0.132 | moderately similar to ( 247)AT3G14550 | Symbols: GGPS3   GGPS3 (GERANYLGERANYL PYROPHOSPHATE SYNTHASE 3); farnesyltransferase                                                     |
| jcvi_1328   | -0.133 | moderately similar to ( 318)AT1G31910 | Symbols:   GHMP kinase family protein                                                                                                     |
| jcvi_300735 | -0.133 | moderately similar to ( 300)AT5G23960 | Symbols:   terpene synthase/cyclase family protein                                                                                        |
| ev224011    | -0.133 | weakly similar to ( 167)AT5G60600     | Symbols: ISPG, CSB3, CLB4, GcpE   GcpE (CHLOROPLAST BIOGENESIS 4)                                                                         |
| jcvi_14909  | -0.134 | moderately similar to ( 263)AT5G57030 | Symbols: LUT2   LUT2 (LUTEIN DEFICIENT 2); lycopene epsilon cyclase                                                                       |
| jcvi_1929   | -0.137 | moderately similar to ( 462)AT5G47720 | Symbols:   acetyl-CoA C-acyltransferase, putative / 3-ketoacyl-CoA thiolase, putative                                                     |
| jcvi_12947  | -0.146 | moderately similar to ( 231)AT1G76490 | Symbols: HMGR1, HMG1   HMG1 (3-HYDROXY-3-METHYLGLUTARYL COA REDUCTASE)                                                                    |
| jcvi_25489  | -0.147 | moderately similar to ( 281)AT2G18620 | Symbols:   geranylgeranyl pyrophosphate synthase, putative / GPP synthetase, putative / farnesyltransferase, putative                     |
| ev225436    | -0.152 | weakly similar to ( 150)AT3G25810     | Symbols:   myrcene/ocimene synthase, putative                                                                                             |
| jcvi_19077  | -0.159 | highly similar to ( 737)AT3G25830     | Symbols: ATTPS-CIN   ATTPS-CIN (TERPENE SYNTHASE-LIKE SEQUENCE-1,8-CINEOLE); myrcene/(E)-beta-ocimene synthase                            |
| jcvi_28617  | -0.160 | weakly similar to ( 194)AT1G78955     | Symbols: CAMS1   CAMS1 (CAMELLIOL C SYNTHASE 1); beta-amyrin synthase                                                                     |
| jcvi_1390   | -0.167 | moderately similar to ( 396)AT4G14210 | Symbols: PDS, PDE226, PDS3   PDS3 (PHYTOENE DESATURASE)                                                                                   |
| jcvi_11050  | -0.167 | moderately similar to ( 429)AT4G15560 | Symbols: DEF, CLA, DXS, DXPS2, CLA1   CLA1 (CLOROPLASTOS ALTERADOS 1)                                                                     |
| eh429199    | -0.168 | moderately similar to ( 304)AT2G21860 | Symbols:   violaxanthin de-epoxidase-related                                                                                              |
| jcvi_21874  | -0.173 | highly similar to ( 550)AT2G39550     | Symbols: PGGT-I, GGB, ATGGT-IB   (GERANYLGERANYLTRANSFERASE-I BETA SUBUNIT); CAAX-protein geranylgeranyltransferase                       |
| ee544890    | -0.181 | moderately similar to ( 235)AT5G11380 | Symbols: DXPS3   DXPS3 (1-DEOXY-D-XYLULOSE 5-PHOSPHATE SYNTHASE 3)                                                                        |
| jcvi_37199  | -0.185 | weakly similar to ( 151)AT5G57030     | Symbols: LUT2   LUT2 (LUTEIN DEFICIENT 2); lycopene epsilon cyclase                                                                       |
| jcvi_15638  | -0.186 | highly similar to ( 508)AT4G24490     | Symbols:   protein binding / protein prenilyltransferase                                                                                  |
| jcvi_39785  | -0.188 | moderately similar to ( 258)AT2G18950 | Symbols: TPT1, ATHPT, VTE2, HPT1   HPT1 (HOMOGENITISATE PHYTYLTRANSFERASE 1); prenilyltransferase                                         |
| jcvi_26708  | -0.192 | moderately similar to ( 379)AT5G60510 | Symbols:   undecaprenyl pyrophosphate synthetase family protein / UPP synthetase family protein                                           |
| jcvi_2339   | -0.198 | moderately similar to ( 201)AT5G48230 | Symbols: EMB1276, ACAT2   ACAT2/EMB1276 (ACETOACETYL-COA THIOLASE 2); acetyl-CoA C-acetyltransferase                                      |
| jcvi_17564  | -0.199 | weakly similar to ( 143)AT2G07050     | Symbols: CAS1   CAS1 (CYCLOARTENOL SYNTHASE 1); cycloartenol synthase                                                                     |
| jcvi_7482   | -0.200 | moderately similar to ( 400)AT5G49555 | Symbols:   amine oxidase-related                                                                                                          |
| jcvi_7179   | -0.218 | moderately similar to ( 367)AT5G48230 | Symbols: EMB1276, ACAT2   ACAT2/EMB1276 (ACETOACETYL-COA THIOLASE 2); acetyl-CoA C-acetyltransferase                                      |
| eh429196    | -0.231 | moderately similar to ( 226)AT2G21860 | Symbols:   violaxanthin de-epoxidase-related                                                                                              |
| jcvi_42310  | -0.234 | moderately similar to ( 273)AT2G17370 | Symbols: HMGR2, HMG2   HMG2 (3-HYDROXY-3-METHYLGLUTARYL-COA REDUCTASE 2)                                                                  |
| jcvi_25684  | -0.237 | weakly similar to ( 138)AT1G06570     | Symbols: HPD, PDS1   PDS1 (PHYTOENE DESATURATION 1)                                                                                       |
| jcvi_4755   | -0.253 | moderately similar to ( 347)AT1G76490 | Symbols: HMGR1, HMG1   HMG1 (3-HYDROXY-3-METHYLGLUTARYL COA REDUCTASE)                                                                    |
| jcvi_5723   | -0.262 | moderately similar to ( 348)AT5G36160 | Symbols:   aminotransferase-related                                                                                                       |
| jcvi_11826  | -0.280 | highly similar to ( 612)AT3G10230     | Symbols: LYC   LYC (LYCOPENE CYCLASE)                                                                                                     |
| dy009108    | -0.286 | moderately similar to ( 340)AT4G34350 | Symbols: ISPH, CLB6   CLB6 (CHLOROPLAST BIOGENESIS 6); 4-hydroxy-3-methylbut-2-en-1-yl diphosphate reductase                              |
| es264628    | -0.286 | moderately similar to ( 348)AT3G11950 | Symbols:   homogenitise farnesyltransferase/ homogenitise geranylgeranyltransferase/ homogenitise solanesyltransferase                    |
| dy018306    | -0.293 | weakly similar to ( 104)AT5G27450     | Symbols: MVK, MK   MK/MVK; mevalonate kinase                                                                                              |
| jcvi_10896  | -0.304 | highly similar to ( 664)AT3G04870     | Symbols: PDE181, ZDS   ZDS (ZETA-CAROTENE DESATURASE); carotene 7,8-desaturase                                                            |
| ev127419    | -0.306 | weakly similar to ( 143)AT3G04870     | Symbols: PDE181, ZDS   ZDS (ZETA-CAROTENE DESATURASE); carotene 7,8-desaturase                                                            |
| es932498    | -0.316 | moderately similar to ( 330)AT3G11950 | Symbols:   homogenitise farnesyltransferase/ homogenitise geranylgeranyltransferase/ homogenitise solanesyltransferase                    |
| jcvi_4538   | -0.343 | weakly similar to ( 182)AT5G60600     | Symbols: ISPG, CSB3, CLB4, GcpE   GcpE (CHLOROPLAST BIOGENESIS 4)                                                                         |
| jcvi_2864   | -0.371 | moderately similar to ( 320)AT4G38460 | Symbols: GGR   GGR (GERANYLGERANYL REDUCTASE); farnesyltransferase                                                                        |
| jcvi_9289   | -0.371 | highly similar to ( 536)AT5G60600     | Symbols: ISPG, CSB3, CLB4, GcpE   GcpE (CHLOROPLAST BIOGENESIS 4)                                                                         |
| es987043    | -0.376 | moderately similar to ( 383)AT4G24490 | Symbols:   protein binding / protein prenilyltransferase                                                                                  |
| jcvi_6145   | -0.378 | moderately similar to ( 454)AT5G48230 | Symbols: EMB1276, ACAT2   ACAT2/EMB1276 (ACETOACETYL-COA THIOLASE 2); acetyl-CoA C-acetyltransferase                                      |
| jcvi_7811   | -0.381 | moderately similar to ( 349)AT4G32770 | Symbols: ATSDX1, VTE1   VTE1 (VITAMIN E DEFICIENT 1)                                                                                      |
| ev053661    | -0.409 | weakly similar to ( 187)AT5G27450     | Symbols: MVK, MK   MK/MVK; mevalonate kinase                                                                                              |
| jcvi_9750   | -0.428 | moderately similar to ( 359)AT3G10230 | Symbols: LYC   LYC (LYCOPENE CYCLASE)                                                                                                     |
| ex108959    | -0.432 | moderately similar to ( 415)AT5G58782 | Symbols:   dehydrodicolyl diphosphate synthase, putative / DEDOL-PP synthase, putative                                                    |
| gy024944    | -0.437 | weakly similar to ( 101)AT3G01050     | Symbols: MUB1   MUB1 (MEMBRANE-ANCHORED UBIQUITIN-FOLD PROTEIN 1 PRECURSOR)                                                               |
| jcvi_2741   | -0.567 | moderately similar to ( 381)AT3G04870 | Symbols: PDE181, ZDS   ZDS (ZETA-CAROTENE DESATURASE); carotene 7,8-desaturase                                                            |
| jcvi_2090   | -0.748 | moderately similar to ( 308)AT1G67360 | Symbols:   rubber elongation factor (REF) family protein                                                                                  |
| ex056312    | -0.787 | weakly similar to ( 196)AT4G32770     | Symbols: ATSDX1, VTE1   VTE1 (VITAMIN E DEFICIENT 1)                                                                                      |
| ee423907    | -0.789 | moderately similar to ( 223)AT3G20160 | Symbols:   geranylgeranyl pyrophosphate synthase, putative / GPP synthetase, putative / farnesyltransferase, putative                     |
| jcvi_27760  | -0.899 | highly similar to ( 553)AT4G15560     | Symbols: DEF, CLA, DXS, DXPS2, CLA1   CLA1 (CLOROPLASTOS ALTERADOS 1)                                                                     |
| ee459992    | -0.997 | weakly similar to ( 138)AT4G23600     | Symbols: JR2, COR13   COR13 (CORONATINE INDUCED 1, JASMONIC ACID RESPONSIVE 2); transaminase                                              |
| jcvi_38125  | -1.131 | moderately similar to ( 271)AT1G78970 | Symbols: ATLUP1, LUP1   LUP1 (LUPEOL SYNTHASE 1); lupeol synthase                                                                         |
| jcvi_263    | -1.223 | moderately similar to ( 460)AT5G58770 | Symbols:   dehydrodicolyl diphosphate synthase, putative / DEDOL-PP synthase, putative                                                    |
| jcvi_40215  | -1.324 | moderately similar to ( 310)AT1G78960 | Symbols: ATLUP2   ATLUP2 (Arabidopsis thaliana lupeol synthase 2); lupeol synthase                                                        |
| cx194269    | -1.354 | moderately similar to ( 272)AT1G78960 | Symbols: ATLUP2   ATLUP2 (Arabidopsis thaliana lupeol synthase 2); lupeol synthase                                                        |

| Identifier | UV-control | cytochrome P450 - Description                                                                                                                    |
|------------|------------|--------------------------------------------------------------------------------------------------------------------------------------------------|
| jcvi_36664 | 2.721      | highly similar to ( 822)AT4G37370   Symbols: CYP81D8   CYP81D8 (cytochrome P450, family 81, subfamily D, polypeptide 8); oxygen binding          |
| jcvi_19911 | 2.118      | moderately similar to ( 292)AT2G30750   Symbols: CYP71A12   CYTOCHROME P450, FAMILY 71, SUBFAMILY A, POLYPEPTIDE 12; oxygen binding              |
| jcvi_41233 | 1.931      | very weakly similar to ( 97.4)ATS5G57220   Symbols: CYP81F2   CYP81F2 (cytochrome P450, family 81, subfamily F, polypeptide 2); oxygen binding   |
| dy019565   | 1.862      | weakly similar to ( 188)ATS5G25180   Symbols: CYP71B14   CYP71B14 (cytochrome P450, family 71, subfamily B, polypeptide 14); oxygen binding      |
| jcvi_8726  | 1.791      | moderately similar to ( 329)AT1G01190   Symbols: CYP78A8   CYP78A8 (cytochrome P450, family 78, subfamily A, polypeptide 8); oxygen binding      |
| jcvi_37166 | 1.776      | highly similar to ( 756)AT2G45570   Symbols: CYP76C2   CYP76C2 (cytochrome P450, family 76, subfamily C, polypeptide 2); oxygen binding          |
| jcvi_11703 | 1.688      | highly similar to ( 652)AT4G22710   Symbols: CYP706A2   CYP706A2 (cytochrome P450, family 706, subfamily A, polypeptide 2); oxygen binding       |
| am388472   | 1.680      | weakly similar to ( 172)ATS5G57220   Symbols: CYP81F2   CYP81F2 (cytochrome P450, family 81, subfamily F, polypeptide 2); oxygen binding         |
| cn731885   | 1.666      | moderately similar to ( 215)AT3G48300   Symbols: CYP71A23   CYP71A23 (cytochrome P450, family 71, subfamily A, polypeptide 23); oxygen binding   |
| es911851   | 1.643      | moderately similar to ( 329)AT5G24960   Symbols: CYP71A14   CYP71A14 (cytochrome P450, family 71, subfamily A, polypeptide 14); oxygen binding   |
| jcvi_12863 | 1.621      | weakly similar to ( 142)ATS5G42590   Symbols: CYP71A16   CYP71A16 (cytochrome P450, family 71, subfamily A, polypeptide 16); oxygen binding      |
| ev166431   | 1.495      | moderately similar to ( 232)AT5G42590   Symbols: CYP71A16   CYP71A16 (cytochrome P450, family 71, subfamily A, polypeptide 16); oxygen binding   |
| am388966   | 1.394      | moderately similar to ( 331)AT3G26170   Symbols: CYP71B19   CYP71B19 (cytochrome P450, family 71, subfamily B, polypeptide 19); oxygen binding   |
| jcvi_18417 | 1.320      | moderately similar to ( 301)ATS5G57220   Symbols: CYP81F2   CYP81F2 (cytochrome P450, family 81, subfamily F, polypeptide 2); oxygen binding     |
| jcvi_13667 | 1.233      | moderately similar to ( 249)AT5G24960   Symbols: CYP71A14   CYP71A14 (cytochrome P450, family 71, subfamily A, polypeptide 14); oxygen binding   |
| jcvi_5209  | 1.203      | moderately similar to ( 374)AT3G26210   Symbols: CYP71B23   CYP71B23 (cytochrome P450, family 71, subfamily B, polypeptide 23); oxygen binding   |
| ee535363   | 1.196      | moderately similar to ( 343)AT3G26230   Symbols: CYP71B24   CYP71B24 (cytochrome P450, family 71, subfamily B, polypeptide 24); oxygen binding   |
| jcvi_18353 | 1.128      | moderately similar to ( 406)AT3G53130   Symbols: CYP97C1, LUT1   LUT1 (LUTEIN DEFICIENT 1); oxygen binding                                       |
| jcvi_8640  | 0.992      | moderately similar to ( 397)AT4G22690   Symbols: CYP706A1   CYP706A1 (cytochrome P450, family 706, subfamily A, polypeptide 1); oxygen binding   |
| jcvi_18435 | 0.910      | moderately similar to ( 383)AT4G19230   Symbols: CYP707A1   CYP707A1 (cytochrome P450, family 707, subfamily A, polypeptide 1); oxygen binding   |
| jcvi_34711 | 0.908      | moderately similar to ( 223)AT2G45550   Symbols: CYP76C4   CYP76C4 (cytochrome P450, family 76, subfamily C, polypeptide 4); oxygen binding      |
| cd813547   | 0.878      | moderately similar to ( 254)AT3G26170   Symbols: CYP71B19   CYP71B19 (cytochrome P450, family 71, subfamily B, polypeptide 19); oxygen binding   |
| jcvi_1241  | 0.832      | highly similar to ( 948)AT4G22690   Symbols: CYP706A1   CYP706A1 (cytochrome P450, family 706, subfamily A, polypeptide 1); oxygen binding       |
| jcvi_3629  | 0.822      | highly similar to ( 571)AT4G22690   Symbols: CYP706A1   CYP706A1 (cytochrome P450, family 706, subfamily A, polypeptide 1); oxygen binding       |
| jcvi_16635 | 0.771      | highly similar to ( 836)AT2G3190   Symbols: CYP81D7   CYP81D7 (cytochrome P450, family 81, subfamily D, polypeptide 7); oxygen binding           |
| jcvi_17274 | 0.752      | moderately similar to ( 245)AT4G36220   Symbols: CYP84A1, FAH1   FAH1 (FERULATE-5-HYDROXYLASE 1); ferulate 5-hydroxylase                         |
| jcvi_32341 | 0.729      | moderately similar to ( 333)AT4G37310   Symbols: CYP81H1   CYP81H1 (cytochrome P450, family 81, subfamily H, polypeptide 1); oxygen binding      |
| ex133161   | 0.723      | moderately similar to ( 325)AT1G13110   Symbols: CYP71B7   CYP71B7 (cytochrome P450, family 71, subfamily B, polypeptide 7); oxygen binding      |
| jcvi_18334 | 0.705      | moderately similar to ( 417)AT2G30490   Symbols: ATCAH, CAH, CYP73A5   [(CINNAMATE-4-HYDROXYLASE)]; trans-cinnamate 4-monooxygenase              |
| am386327   | 0.696      | moderately similar to ( 224)AT4G37320   Symbols: CYP81D5   CYP81D5 (cytochrome P450, family 81, subfamily D, polypeptide 5); oxygen binding      |
| jcvi_18951 | 0.688      | moderately similar to ( 312)AT3G14680   Symbols: CYP72A14   CYP72A14 (cytochrome P450, family 72, subfamily A, polypeptide 14); oxygen binding   |
| jcvi_25119 | 0.652      | moderately similar to ( 221)AT1G57750   Symbols: MAH1, CYP96A15   CYP96A15 (MID-CHAIN ALKANE HYDROXYLASE 1)                                      |
| jcvi_33391 | 0.628      | highly similar to ( 630)AT4G39950   Symbols: CYP79B2   CYP79B2 (cytochrome P450, family 79, subfamily B, polypeptide 2); oxygen binding          |
| jcvi_24334 | 0.623      | highly similar to ( 719)AT2G22330   Symbols: CYP79B3   CYP79B3 (cytochrome P450, family 79, subfamily B, polypeptide 3); oxygen binding          |
| jcvi_13253 | 0.618      | highly similar to ( 551)AT4G36220   Symbols: CYP84A1, FAH1   FAH1 (FERULATE-5-HYDROXYLASE 1); ferulate 5-hydroxylase                             |
| ex020887   | 0.615      | weakly similar to ( 133)ATS5G25120   Symbols: CYP71B11   CYP71B11 (cytochrome P450, family 71, subfamily B, polypeptide 11); oxygen binding      |
| jcvi_12930 | 0.613      | highly similar to ( 756)AT4G37430   Symbols: CYP81F1, CYP91A2   CYP91A2 (CYTOCHROME P450 MONOOXYGENASE 91A2); oxygen binding                     |
| jcvi_15156 | 0.593      | moderately similar to ( 293)AT3G26200   Symbols: CYP71B22   CYP71B22 (cytochrome P450, family 71, subfamily B, polypeptide 22); oxygen binding   |
| jcvi_40829 | 0.571      | moderately similar to ( 452)AT2G45510   Symbols: CYP704A2   CYP704A2 (cytochrome P450, family 704, subfamily A, polypeptide 2); oxygen binding   |
| jcvi_32691 | 0.563      | highly similar to ( 626)AT4G39510   Symbols: CYP96A12   CYP96A12 (cytochrome P450, family 96, subfamily A, polypeptide 12); oxygen binding       |
| jcvi_16379 | 0.560      | highly similar to ( 564)AT4G39950   Symbols: CYP79B2   CYP79B2 (cytochrome P450, family 79, subfamily B, polypeptide 2); oxygen binding          |
| jcvi_18851 | 0.531      | highly similar to ( 854)AT3G26170   Symbols: CYP71B19   CYP71B19 (cytochrome P450, family 71, subfamily B, polypeptide 19); oxygen binding       |
| jcvi_4639  | 0.523      | highly similar to ( 546)AT3G14680   Symbols: CYP72A14   CYP72A14 (cytochrome P450, family 72, subfamily A, polypeptide 14); oxygen binding       |
| jcvi_34819 | 0.522      | moderately similar to ( 211)ATS5G57260   Symbols: CYP71B10   CYP71B10 (cytochrome P450, family 71, subfamily B, polypeptide 10); oxygen binding  |
| jcvi_8948  | 0.517      | moderately similar to ( 299)AT4G36220   Symbols: CYP84A1, FAH1   FAH1 (FERULATE-5-HYDROXYLASE 1); ferulate 5-hydroxylase                         |
| ee540603   | 0.513      | weakly similar to ( 137)AT4G37320   Symbols: CYP81D5   CYP81D5 (cytochrome P450, family 81, subfamily D, polypeptide 5); oxygen binding          |
| ex137858   | 0.512      | moderately similar to ( 276)AT2G30490   Symbols: ATCAH, CAH, CYP73A5   [(CINNAMATE-4-HYDROXYLASE)]; trans-cinnamate 4-monooxygenase              |
| ev125432   | 0.508      | moderately similar to ( 240)AT4G37410   Symbols: CYP81F4   CYP81F4 (cytochrome P450, family 81, subfamily F, polypeptide 4); oxygen binding      |
| jcvi_109   | 0.507      | moderately similar to ( 493)AT4G31500   Symbols: SUR2, RNT1, ATR4, CYP83B1   [(CYTOCHROME P450 MONOOXYGENASE 83B1)]; oxygen binding              |
| jcvi_34193 | 0.507      | moderately similar to ( 244)AT1G13080   Symbols: CYP71B2   CYP71B2 (CYTOCHROME P450 71B2); oxygen binding                                        |
| es904596   | 0.505      | weakly similar to ( 123)AT4G27710   Symbols: CYP709B3   CYP709B3 (cytochrome P450, family 709, subfamily B, polypeptide 3); oxygen binding       |
| jcvi_24359 | 0.495      | moderately similar to ( 328)AT3G26200   Symbols: CYP71B22   CYP71B22 (cytochrome P450, family 71, subfamily B, polypeptide 22); oxygen binding   |
| jcvi_1512  | 0.494      | highly similar to ( 535)AT3G14690   Symbols: CYP72A15   CYP72A15 (cytochrome P450, family 72, subfamily A, polypeptide 15); oxygen binding       |
| ee439868   | 0.451      | weakly similar to ( 183)AT3G26150   Symbols: CYP71B16   CYP71B16 (cytochrome P450, family 71, subfamily B, polypeptide 16); oxygen binding       |
| jcvi_31166 | 0.447      | highly similar to ( 644)ATS5G24910   Symbols: CYP71A41   CYP71A41 (cytochrome P450, family 71, subfamily A, polypeptide 41); oxygen binding      |
| jcvi_8274  | 0.442      | moderately similar to ( 350)AT3G26290   Symbols: CYP71B26   CYP71B26 (cytochrome P450, family 71, subfamily B, polypeptide 26); oxygen binding   |
| jcvi_4650  | 0.439      | moderately similar to ( 459)AT4G31500   Symbols: SUR2, RNT1, RED1, ATR4, CYP83B1   [(CYTOCHROME P450 MONOOXYGENASE 83B1)]; oxygen binding        |
| jcvi_22839 | 0.434      | moderately similar to ( 233)AT2G24180   Symbols: CYP71B6   CYP71B6 (CYTOCHROME P450 71B6); oxygen binding                                        |
| jcvi_15740 | 0.430      | moderately similar to ( 343)AT3G56630   Symbols: CYP94D2   CYP94D2 (cytochrome P450, family 94, subfamily D, polypeptide 2); oxygen binding      |
| ex096737   | 0.423      | moderately similar to ( 293)AT2G45570   Symbols: CYP76C2   CYP76C2 (cytochrome P450, family 76, subfamily C, polypeptide 2); oxygen binding      |
| jcvi_4133  | 0.421      | moderately similar to ( 404)AT3G26300   Symbols: CYP71B34   CYP71B34 (cytochrome P450, family 71, subfamily B, polypeptide 34); oxygen binding   |
| jcvi_14696 | 0.414      | moderately similar to ( 232)AT3G26200   Symbols: CYP71B22   CYP71B22 (cytochrome P450, family 71, subfamily B, polypeptide 22); oxygen binding   |
| jcvi_15136 | 0.410      | moderately similar to ( 230)AT5G07990   Symbols: CYP75B1, D501, TT7   TT7 (TRANSPARENT TESTA 7); flavonoid 3'-monooxygenase/oxygen binding       |
| jcvi_27495 | 0.403      | moderately similar to ( 460)AT5G67310   Symbols: CYP81G1   CYP81G1 (cytochrome P450, family 81, subfamily G, polypeptide 1); oxygen binding      |
| ex125578   | 0.402      | moderately similar to ( 273)AT3G26310   Symbols: CYP71B35   CYP71B35 (cytochrome P450, family 71, subfamily B, polypeptide 35); oxygen binding   |
| jcvi_34558 | 0.381      | moderately similar to ( 371)ATS5G25180   Symbols: CYP71B14   CYP71B14 (cytochrome P450, family 71, subfamily B, polypeptide 14); oxygen binding  |
| jcvi_15251 | 0.380      | moderately similar to ( 446)AT3G14610   Symbols: CYP72A7   CYP72A7 (cytochrome P450, family 72, subfamily A, polypeptide 7); oxygen binding      |
| jcvi_8722  | 0.368      | moderately similar to ( 295)AT2G34500   Symbols: CYP710A1   (family 710, subfamily A, polypeptide 1); C-22 sterol desaturase/oxygen binding      |
| jcvi_20441 | 0.360      | highly similar to ( 737)AT3G28740   Symbols: CYP81D1   cytochrome P450 family protein                                                            |
| jcvi_42408 | 0.355      | moderately similar to ( 465)AT3G56630   Symbols: CYP94D2   CYP94D2 (cytochrome P450, family 94, subfamily D, polypeptide 2); oxygen binding      |
| jcvi_28286 | 0.344      | very weakly similar to ( 95.9)AT4G27710   Symbols: CYP709B3   CYP709B3 (cytochrome P450, family 709, subfamily B, polypeptide 3); oxygen binding |
| dy018071   | 0.334      | weakly similar to ( 133)AT3G14650   Symbols: CYP72A11   CYP72A11 (cytochrome P450, family 72, subfamily A, polypeptide 11); oxygen binding       |
| ev120534   | 0.284      | moderately similar to ( 298)AT5G67310   Symbols: CYP81G1   CYP81G1 (cytochrome P450, family 81, subfamily G, polypeptide 1); oxygen binding      |
| jcvi_13081 | 0.283      | highly similar to ( 981)AT4G15110   Symbols: CYP97B3   CYP97B3 (cytochrome P450, family 97, subfamily B, polypeptide 3); oxygen binding          |
| ev170951   | 0.272      | weakly similar to ( 105)AT3G28740   Symbols: CYP81D1   cytochrome P450 family protein                                                            |
| jcvi_18572 | 0.266      | moderately similar to ( 317)AT1G75130   Symbols: CYP721A1   CYP721A1 (cytochrome P450, family 721, subfamily A, polypeptide 1); oxygen binding   |
| jcvi_10547 | 0.262      | moderately similar to ( 254)AT3G03470   Symbols: CYP89A9   CYP89A9 (cytochrome P450, family 89, subfamily A, polypeptide 9); oxygen binding      |
| cn727087   | 0.243      | moderately similar to ( 338)AT1G13080   Symbols: CYP71B2   CYP71B2 (CYTOCHROME P450 71B2); oxygen binding                                        |
| jcvi_7218  | 0.224      | moderately similar to ( 291)AT4G37410   Symbols: CYP81F4   CYP81F4 (cytochrome P450, family 81, subfamily F, polypeptide 4); oxygen binding      |
| en087499   | 0.215      | moderately similar to ( 270)AT3G52970   Symbols: CYP76G1   CYP76G1 (cytochrome P450, family 76, subfamily G, polypeptide 1); oxygen binding      |
| ex097771   | 0.213      | moderately similar to ( 423)AT2G34500   Symbols: CYP710A3   [(family 710, subfamily A, polypeptide 1)]; C-22 sterol desaturase/oxygen binding    |
| jcvi_11055 | 0.208      | highly similar to ( 884)AT1G31800   Symbols: CYP97A3, LUT5   [(CYTOCHROME P450-TYPE MONOOXYGENASE 97A3)]; carotene beta-ring hydroxylase         |
| ee445881   | 0.202      | weakly similar to ( 127)ATS5G25120   Symbols: CYP71B11   CYP71B11 (cytochrome P450, family 71, subfamily B, polypeptide 11); oxygen binding      |
| ee434071   | 0.200      | moderately similar to ( 207)AT4G15300   Symbols: CYP702A2   CYP702A2 (cytochrome P450, family 702, subfamily A, polypeptide 2); oxygen binding   |
| jcvi_844   | 0.193      | moderately similar to ( 439)AT3G53130   Symbols: CYP97C1, LUT1   LUT1 (LUTEIN DEFICIENT 1); oxygen binding                                       |
| dy002094   | 0.183      | weakly similar to ( 117)ATS5G24960   Symbols: CYP71A14   CYP71A14 (cytochrome P450, family 71, subfamily A, polypeptide 14); oxygen binding      |
| jcvi_35248 | 0.169      | moderately similar to ( 201)AT1G13150   Symbols: CYP86C4   CYP86C4 (cytochrome P450, family 86, subfamily C, polypeptide 4); oxygen binding      |
| jcvi_34585 | 0.164      | moderately similar to ( 306)AT3G10570   Symbols: CYP77A6   CYP77A6 (cytochrome P450, family 77, subfamily A, polypeptide 6); oxygen binding      |
| am394776   | 0.160      | weakly similar to ( 119)AT3G20090   Symbols: CYP705A18   CYP705A18 (cytochrome P450, family 705, subfamily A, polypeptide 18); oxygen binding    |
| ev167713   | 0.159      | moderately similar to ( 221)AT1G13080   Symbols: CYP71B2   CYP71B2 (CYTOCHROME P450 71B2); oxygen binding                                        |
| es906507   | 0.154      | moderately similar to ( 391)AT1G12740   Symbols: CYP87A2   CYP87A2 (cytochrome P450, family 87, subfamily A, polypeptide 2); oxygen binding      |
| jcvi_35958 | 0.142      | highly similar to ( 683)AT1G13080   Symbols: CYP71B2   CYP71B2 (CYTOCHROME P450 71B2); oxygen binding                                            |
| jcvi_40911 | 0.142      | moderately similar to ( 446)AT1G13110   Symbols: CYP71B7   CYP71B7 (cytochrome P450, family 71, subfamily B, polypeptide 7); oxygen binding      |
| jcvi_10629 | 0.140      | moderately similar to ( 341)AT2G46960   Symbols: CYP709B1   CYP709B1 (cytochrome P450, family 709, subfamily B, polypeptide 1); oxygen binding   |
| jcvi_3487  | 0.134      | highly similar to ( 832)AT2G46950   Symbols: CYP709B2   CYP709B2 (cytochrome P450, family 709, subfamily B, polypeptide 2); oxygen binding       |
| cn726649   | 0.131      | moderately similar to ( 218)AT5G25140   Symbols: CYP71B13   CYP71B13 (cytochrome P450, family 71, subfamily B, polypeptide 13); oxygen binding   |
| jcvi_37300 | 0.130      | weakly similar to ( 198)AT4G19230   Symbols: CYP707A1   CYP707A1 (cytochrome P450, family 707, subfamily A, polypeptide 1); oxygen binding       |
| ev063264   | 0.125      | weakly similar to ( 182)AT1G79370   Symbols: CYP79C1   CYP79C1 (cytochrome P450, family 79, subfamily C, polypeptide 1); oxygen binding          |
| jcvi_25553 | 0.120      | moderately similar to ( 226)AT3G28740   Symbols: CYP81D1   cytochrome P450 family protein                                                        |
| jcvi_29673 | 0.118      | moderately similar to ( 469)AT3G56630   Symbols: CYP94D2   CYP94D2 (cytochrome P450, family 94, subfamily D, polypeptide 2); oxygen binding      |

|            |        |                                       |                                                                                                                     |
|------------|--------|---------------------------------------|---------------------------------------------------------------------------------------------------------------------|
| ev109894   | 0.118  | moderately similar to ( 281)AT4G37330 | Symbols: CYP81D4   CYP81D4 (cytochrome P450, family 81, subfamily D, polypeptide 4); oxygen binding                 |
| jcvi_38723 | 0.111  | moderately similar to (261)AT4G39510  | Symbols: CYP96A12   CYP96A12 (cytochrome P450, family 96, subfamily A, polypeptide 12); oxygen binding              |
| jcvi_20119 | 0.110  | moderately similar to (359)AT2G24180  | Symbols: CYP71B6   CYP71B6 (CYTOCHROME P450 71B6); oxygen binding                                                   |
| jcvi_18271 | 0.108  | moderately similar to (254)AT1G75130  | Symbols: CYP721A1   CYP721A1 (cytochrome P450, family 721, subfamily A, polypeptide 1); oxygen binding              |
| jcvi_35653 | 0.107  | moderately similar to (227)AT5G42590  | Symbols: CYP71A16   CYP71A16 (cytochrome P450, family 71, subfamily A, polypeptide 16); oxygen binding              |
| jcvi_39399 | 0.103  | moderately similar to (234)AT1G13080  | Symbols: CYP71B2   CYP71B2 (CYTOCHROME P450 71B2); oxygen binding                                                   |
| ev193501   | 0.089  | moderately similar to (342)AT3G56630  | Symbols: CYP94D2   CYP94D2 (cytochrome P450, family 94, subfamily D, polypeptide 2); oxygen binding                 |
| es912347   | 0.086  | moderately similar to (318)AT1G50520  | Symbols: CYP705A27   CYP705A27 (cytochrome P450, family 705, subfamily A, polypeptide 27); oxygen binding           |
| dn961108   | 0.086  | moderately similar to (265)AT3G26220  | Symbols: CYP71B3   CYP71B3 (cytochrome P450, family 71, subfamily B, polypeptide 3); oxygen binding                 |
| es999487   | 0.084  | moderately similar to (291)AT4G19230  | Symbols: CYP707A1   CYP707A1 (cytochrome P450, family 707, subfamily A, polypeptide 1); oxygen binding              |
| jcvi_1289  | 0.072  | moderately similar to (219)AT3G14680  | Symbols: CYP72A14   CYP72A14 (cytochrome P450, family 72, subfamily A, polypeptide 14); oxygen binding              |
| dn192514   | 0.068  | weakly similar to (113)AT2G45510      | Symbols: CYP704A2   CYP704A2 (cytochrome P450, family 704, subfamily A, polypeptide 2); oxygen binding              |
| jcvi_36182 | 0.065  | moderately similar to (202)AT5G23190  | Symbols: CYP86B1   CYP86B1 (cytochrome P450, family 86, subfamily B, polypeptide 1); oxygen binding                 |
| jcvi_2367  | 0.063  | weakly similar to (187)AT4G32170      | Symbols: CYP96A2   CYP96A2 (cytochrome P450, family 96, subfamily A, polypeptide 2); oxygen binding                 |
| ev166291   | 0.063  | moderately similar to (335)AT5G25900  | Symbols: CYP701A3, GA3   GA3 (GA REQUIRING 3); oxygen binding                                                       |
| jcvi_33502 | 0.060  | moderately similar to (450)AT4G31940  | Symbols: CYP82C4   CYP82C4 (cytochrome P450, family 82, subfamily C, polypeptide 4); oxygen binding                 |
| jcvi_41946 | 0.059  | moderately similar to (484)AT3G25180  | Symbols: CYP82G1   CYP82G1 (cytochrome P450, family 82, subfamily G, polypeptide 1); oxygen binding                 |
| jcvi_21655 | 0.058  | moderately similar to (233)AT1G17060  | Symbols: SOB7, CYP72C1   CYP72C1 (cytochrome P450, family 72, subfamily C, polypeptide 1); oxygen binding           |
| jcvi_23213 | 0.056  | moderately similar to (400)AT1G13140  | Symbols: CYP86C3   CYP86C3 (cytochrome P450, family 86, subfamily C, polypeptide 3); oxygen binding                 |
| ev036453   | 0.056  | moderately similar to (280)AT5G05260  | Symbols: CYP79A2   CYP79A2 (CYTOCHROME P450 79A2); oxygen binding                                                   |
| eg020568   | 0.055  | moderately similar to (219)AT2G46960  | Symbols: CYP709B1   CYP709B1 (cytochrome P450, family 709, subfamily B, polypeptide 1); oxygen binding              |
| cd841165   | 0.055  | weakly similar to (125)AT5G04630      | Symbols: CYP77A9   CYP77A9 (cytochrome P450, family 77, subfamily A, polypeptide 9); oxygen binding                 |
| jcvi_31023 | 0.054  | moderately similar to (483)AT5G24960  | Symbols: CYP71A14   CYP71A14 (cytochrome P450, family 71, subfamily A, polypeptide 14); oxygen binding              |
| jcvi_36402 | 0.053  | moderately similar to (208)AT3G14680  | Symbols: CYP72A14   CYP72A14 (cytochrome P450, family 72, subfamily A, polypeptide 14); oxygen binding              |
| jcvi_15865 | 0.049  | moderately similar to (375)AT1G24540  | Symbols: CYP86C1   CYP86C1 (cytochrome P450, family 86, subfamily C, polypeptide 1); oxygen binding                 |
| jcvi_6793  | 0.049  | moderately similar to (295)AT3G20130  | Symbols: CYP705A22   CYP705A22 (cytochrome P450, family 705, subfamily A, polypeptide 22)                           |
| ev121242   | 0.048  | moderately similar to (293)AT4G37410  | Symbols: CYP81F4   CYP81F4 (cytochrome P450, family 81, subfamily F, polypeptide 4); oxygen binding                 |
| ee403440   | 0.047  | weakly similar to (150)AT3G26160      | Symbols: CYP71B17   CYP71B17 (cytochrome P450, family 71, subfamily B, polypeptide 17); oxygen binding              |
| jcvi_32659 | 0.047  | moderately similar to (315)AT5G57220  | Symbols: CYP81F2   CYP81F2 (cytochrome P450, family 81, subfamily F, polypeptide 2); oxygen binding                 |
| jcvi_29123 | 0.047  | weakly similar to (176)AT2G29090      | Symbols: CYP707A2   CYP707A2 (cytochrome P450, family 707, subfamily A, polypeptide 2); oxygen binding              |
| ex044579   | 0.042  | moderately similar to (352)AT5G38450  | Symbols: CYP735A1   CYP735A1 (cytochrome P450, family 735, subfamily A, polypeptide 1); oxygen binding              |
| jcvi_40877 | 0.041  | moderately similar to (381)AT4G37430  | Symbols: CYP81F1, CYP91A2   CYP91A2 (CYTOCHROME P450 MONOOXYGENASE 91A2); oxygen binding                            |
| bg543646   | 0.039  | weakly similar to (130)AT1G13110      | Symbols: CYP71B7   CYP71B7 (cytochrome P450, family 71, subfamily B, polypeptide 7); oxygen binding                 |
| jcvi_38817 | 0.039  | moderately similar to (243)AT2G14100  | Symbols: CYP705A13   CYP705A13 (cytochrome P450, family 705, subfamily A, polypeptide 13); oxygen binding           |
| jcvi_8970  | 0.038  | highly similar to (684)AT3G28740      | Symbols: CYP81D1   cytochrome P450 family protein                                                                   |
| ex018812   | 0.037  | moderately similar to (251)AT1G13080  | Symbols: CYP71B2   CYP71B2 (CYTOCHROME P450 71B2); oxygen binding                                                   |
| jcvi_13160 | 0.036  | moderately similar to (365)AT1G13710  | Symbols: CYP78A5   CYP78A5 (cytochrome P450, family 78, subfamily A, polypeptide 5); oxygen binding                 |
| ev052709   | 0.033  | weakly similar to (167)AT1G24540      | Symbols: CYP86C1   CYP86C1 (cytochrome P450, family 86, subfamily C, polypeptide 1); oxygen binding                 |
| jcvi_19719 | 0.033  | moderately similar to (299)AT3G28740  | Symbols: CYP81D1   cytochrome P450 family protein                                                                   |
| ev152669   | 0.032  | moderately similar to (250)AT5G57220  | Symbols: CYP81F2   CYP81F2 (cytochrome P450, family 81, subfamily F, polypeptide 2); oxygen binding                 |
| jcvi_13403 | 0.031  | highly similar to (736)AT2G45580      | Symbols: CYP76C3   CYP76C3 (cytochrome P450, family 76, subfamily C, polypeptide 3); oxygen binding                 |
| jcvi_26392 | 0.030  | moderately similar to (292)AT4G36220  | Symbols: CYP84A1, FAH1   FAH1 (FERULATE-5-HYDROXYLASE 1); ferulate 5-hydroxylase                                    |
| jcvi_33109 | 0.029  | moderately similar to (424)AT1G01280  | Symbols: CYP703A2, CYP703   CYP703A2 (CYTOCHROME P450, FAMILY 703, SUBFAMILY A, POLYPEPTIDE 2)                      |
| jcvi_458   | 0.026  | highly similar to (777)AT5G05690      | Symbols: CYP90A, CYP90, CBB3, DWF3, CYP90A1, CPD   CPD (CABBAGE 3)                                                  |
| ex044469   | 0.024  | moderately similar to (296)AT3G14690  | Symbols: CYP72A15   CYP72A15 (cytochrome P450, family 72, subfamily A, polypeptide 15); oxygen binding              |
| jcvi_14950 | 0.024  | highly similar to (754)AT4G13770      | Symbols: REF2, CYP83A1   CYP83A1 (CYTOCHROME P450 83A1); oxygen binding                                             |
| jcvi_16866 | 0.023  | moderately similar to (321)AT2G45550  | Symbols: CYP76C4   CYP76C4 (cytochrome P450, family 76, subfamily C, polypeptide 4); oxygen binding                 |
| jcvi_19692 | 0.020  | moderately similar to (212)AT4G37310  | Symbols: CYP81H1   CYP81H1 (cytochrome P450, family 81, subfamily H, polypeptide 1); oxygen binding                 |
| ev121493   | 0.020  | moderately similar to (263)AT5G67310  | Symbols: CYP81G1   CYP81G1 (cytochrome P450, family 81, subfamily G, polypeptide 1); oxygen binding                 |
| ex106290   | 0.020  | moderately similar to (262)AT4G37330  | Symbols: CYP81D4   CYP81D4 (cytochrome P450, family 81, subfamily D, polypeptide 4); oxygen binding                 |
| ev177168   | 0.019  | moderately similar to (216)AT4G15396  | Symbols: CYP702A6   heme binding / iron ion binding / monooxygenase                                                 |
| jcvi_34106 | 0.019  | moderately similar to (342)AT3G52970  | Symbols: CYP76G1   CYP76G1 (cytochrome P450, family 76, subfamily G, polypeptide 1); oxygen binding                 |
| jcvi_14895 | 0.019  | moderately similar to (336)AT4G19230  | Symbols: CYP707A1   CYP707A1 (cytochrome P450, family 707, subfamily A, polypeptide 1); oxygen binding              |
| jcvi_5423  | 0.018  | moderately similar to (325)AT3G61880  | Symbols: CYP78A9   CYP78A9 (CYTOCHROME P450 78A9); oxygen binding                                                   |
| jcvi_16677 | 0.017  | moderately similar to (238)AT1G57750  | Symbols: MAH1, CYP96A15   CYP96A15/MAH1 (MID-CHAIN ALKANE HYDROXYLASE 1)                                            |
| jcvi_21729 | 0.015  | weakly similar to (169)AT5G23190      | Symbols: CYP86B1   CYP86B1 (cytochrome P450, family 86, subfamily B, polypeptide 1); oxygen binding                 |
| jcvi_15755 | 0.014  | moderately similar to (347)AT5G25120  | Symbols: CYP71B11   CYP71B11 (cytochrome P450, family 71, subfamily B, polypeptide 11); oxygen binding              |
| ev077815   | 0.012  | moderately similar to (213)AT3G26310  | Symbols: CYP71B35   CYP71B35 (cytochrome P450, family 71, subfamily B, polypeptide 35); oxygen binding              |
| ev060677   | 0.012  | moderately similar to (318)AT1G17060  | Symbols: SOB7, CYP72C1   CYP72C1 (cytochrome P450, family 72, subfamily C, polypeptide 1); oxygen binding           |
| jcvi_28614 | 0.008  | moderately similar to (267)AT1G78490  | Symbols: CYP708A3   CYP708A3 (cytochrome P450, family 708, subfamily A, polypeptide 3); oxygen binding              |
| jcvi_25998 | 0.007  | weakly similar to (165)AT4G39500      | Symbols: CYP96A11   CYP96A11 (cytochrome P450, family 96, subfamily A, polypeptide 11); oxygen binding              |
| jcvi_13505 | 0.006  | moderately similar to (388)AT3G26330  | Symbols: CYP71B37   CYP71B37 (cytochrome P450, family 71, subfamily B, polypeptide 37); oxygen binding              |
| jcvi_35470 | 0.004  | weakly similar to (169)AT2G46960      | Symbols: CYP709B1   CYP709B1 (cytochrome P450, family 709, subfamily B, polypeptide 1); oxygen binding              |
| jcvi_2258  | 0.003  | moderately similar to (375)AT1G74540  | Symbols: CYP98A8   CYP98A8 (cytochrome P450, family 98, subfamily A, polypeptide 8); oxygen binding                 |
| jcvi_13256 | 0.001  | moderately similar to (410)AT3G28740  | Symbols: CYP81D1   cytochrome P450 family protein                                                                   |
| jcvi_27950 | 0.001  | moderately similar to (306)AT2G45550  | Symbols: CYP76C4   CYP76C4 (cytochrome P450, family 76, subfamily C, polypeptide 4); oxygen binding                 |
| jcvi_13758 | -0.001 | moderately similar to (343)AT1G01600  | Symbols: CYP86A4   CYP86A4 (cytochrome P450, family 86, subfamily A, polypeptide 4); oxygen binding                 |
| jcvi_24252 | -0.001 | highly similar to (599)AT5G57220      | Symbols: CYP81F2   CYP81F2 (cytochrome P450, family 81, subfamily F, polypeptide 2); oxygen binding                 |
| ev220365   | -0.002 | moderately similar to (269)AT2G25160  | Symbols: CYP82F1   CYP82F1 (cytochrome P450, family 82, subfamily F, polypeptide 1); oxygen binding                 |
| jcvi_2779  | -0.002 | moderately similar to (317)AT3G26230  | Symbols: CYP71B24   CYP71B24 (cytochrome P450, family 71, subfamily B, polypeptide 24); oxygen binding              |
| jcvi_15484 | -0.003 | moderately similar to (341)AT1G13080  | Symbols: CYP71B2   CYP71B2 (CYTOCHROME P450 71B2); oxygen binding                                                   |
| jcvi_35527 | -0.004 | moderately similar to (261)AT5G23190  | Symbols: CYP86B1   CYP86B1 (cytochrome P450, family 86, subfamily B, polypeptide 1); oxygen binding                 |
| ev004703   | -0.004 | moderately similar to (326)AT1G17060  | Symbols: SOB7, CYP72C1   CYP72C1 (cytochrome P450, family 72, subfamily C, polypeptide 1); oxygen binding           |
| ee435302   | -0.005 | weakly similar to (118)AT3G26230      | Symbols: CYP71B24   CYP71B24 (cytochrome P450, family 71, subfamily B, polypeptide 24); oxygen binding              |
| jcvi_38864 | -0.006 | moderately similar to (429)AT3G52970  | Symbols: CYP76G1   CYP76G1 (cytochrome P450, family 76, subfamily G, polypeptide 1); oxygen binding                 |
| jcvi_21903 | -0.006 | moderately similar to (416)AT5G05690  | Symbols: CYP90A, CYP90, CBB3, DWF3, CYP90A1, CPD   CPD (CABBAGE 3)                                                  |
| jcvi_14640 | -0.007 | moderately similar to (375)AT2G42250  | Symbols: CYP712A1   CYP712A1 (cytochrome P450, family 712, subfamily A, polypeptide 1); oxygen binding              |
| ev170896   | -0.007 | moderately similar to (254)AT5G25900  | Symbols: CYP701A3, GA3   GA3 (GA REQUIRING 3); oxygen binding                                                       |
| dy025805   | -0.008 | moderately similar to (333)AT3G48270  | Symbols: CYP71A26   CYP71A26 (cytochrome P450, family 71, subfamily A, polypeptide 26); oxygen binding              |
| ev160033   | -0.008 | moderately similar to (346)AT1G11600  | Symbols: CYP77B1   CYP77B1 (cytochrome P450, family 77, subfamily B, polypeptide 1); oxygen binding                 |
| jcvi_12683 | -0.011 | moderately similar to (299)AT1G57750  | Symbols: MAH1, CYP96A15   CYP96A15/MAH1 (MID-CHAIN ALKANE HYDROXYLASE 1)                                            |
| cx189341   | -0.011 | weakly similar to (123)AT3G26280      | Symbols: CYP71B4   CYP71B4 (cytochrome P450, family 71, subfamily B, polypeptide 4); oxygen binding                 |
| ev137238   | -0.011 | weakly similar to (172)AT3G19270      | Symbols: CYP707A4   CYP707A4 (cytochrome P450, family 707, subfamily A, polypeptide 4); oxygen binding              |
| jcvi_26942 | -0.012 | moderately similar to (279)AT2G46960  | Symbols: CYP709B1   CYP709B1 (cytochrome P450, family 709, subfamily B, polypeptide 1); oxygen binding              |
| jcvi_17717 | -0.012 | moderately similar to (351)AT2G34500  | Symbols: CYP710A1   cytochrome P450, family 710, subfamily A, polypeptide 1; C-22 sterol desaturase/ oxygen binding |
| cn728267   | -0.013 | moderately similar to (300)AT5G44620  | Symbols: CYP706A3   CYP706A3 (cytochrome P450, family 706, subfamily A, polypeptide 3); oxygen binding              |
| jcvi_32868 | -0.014 | weakly similar to (124)AT4G12320      | Symbols: CYP706A6   CYP706A6 (cytochrome P450, family 706, subfamily A, polypeptide 6); oxygen binding              |
| jcvi_1486  | -0.014 | moderately similar to (377)AT5G67310  | Symbols: CYP81G1   CYP81G1 (cytochrome P450, family 81, subfamily G, polypeptide 1); oxygen binding                 |
| jcvi_36410 | -0.014 | weakly similar to (127)AT2G23190      | Symbols: CYP81D7   CYP81D7 (cytochrome P450, family 81, subfamily D, polypeptide 7); oxygen binding                 |
| jcvi_13408 | -0.017 | moderately similar to (457)AT1G69500  | Symbols:   oxygen binding                                                                                           |
| ev216628   | -0.017 | weakly similar to (191)AT3G53130      | Symbols: CYP97C1, LUT1   LUT1 (LUTEIN DEFICIENT 1); oxygen binding                                                  |
| jcvi_30612 | -0.018 | highly similar to (858)AT3G14630      | Symbols: CYP72A9   CYP72A9 (cytochrome P450, family 72, subfamily A, polypeptide 9); oxygen binding                 |
| cx088960   | -0.019 | moderately similar to (295)AT3G19270  | Symbols: CYP709B3   CYP709B3 (cytochrome P450, family 709, subfamily B, polypeptide 3); oxygen binding              |
| ev122740   | -0.022 | weakly similar to (198)AT3G20080      | Symbols: CYP705A15   CYP705A15 (cytochrome P450, family 705, subfamily A, polypeptide 15); oxygen binding           |
| ex088251   | -0.023 | moderately similar to (293)AT1G01280  | Symbols: CYP703A2   NADH or NADPH as one donor, and incorporation of one atom of oxygen / oxygen binding            |
| ev207466   | -0.025 | moderately similar to (384)AT2G46660  | Symbols: CYP78A6   CYP78A6 (cytochrome P450, family 78, subfamily A, polypeptide 6); oxygen binding                 |
| jcvi_41173 | -0.026 | weakly similar to (181)AT5G02900      | Symbols: CYP96A13   CYP96A13 (cytochrome P450, family 96, subfamily A, polypeptide 13); oxygen binding              |
| jcvi_13752 | -0.027 | moderately similar to (343)AT1G69500  | Symbols:   oxygen binding                                                                                           |
| jcvi_23627 | -0.028 | moderately similar to (295)AT5G67310  | Symbols: CYP81G1   CYP81G1 (cytochrome P450, family 81, subfamily G, polypeptide 1); oxygen binding                 |
| jcvi_21425 | -0.028 | weakly similar to (188)AT2G42180      | Symbols: CYP71B6   CYP71B6 (CYTOCHROME P450 71B6); oxygen binding                                                   |
| cd836257   | -0.030 | moderately similar to (296)AT5G57260  | Symbols: CYP71B10   CYP71B10 (cytochrome P450, family 71, subfamily B, polypeptide 10); oxygen binding              |

|            |                                                                                                                                                               |
|------------|---------------------------------------------------------------------------------------------------------------------------------------------------------------|
| ee470757   | -0.030 weakly similar to (141)AT2G42850   Symbols: CYP718   CYP718 (cytochrome P450, family 718); oxygen binding                                              |
| ev211246   | -0.031 moderately similar to (276)AT4G37340   Symbols: CYP81D3   CYP81D3 (cytochrome P450, family 81, subfamily D, polypeptide 3); oxygen binding             |
| cn830062   | -0.031 moderately similar to (392)AT2G45970   Symbols: LCR, CYP86A8   CYP86A8 (LACERATA); fatty acid (omega-1)-hydroxylase/ oxygen binding                    |
| ev109225   | -0.031 weakly similar to (187)AT3G52970   Symbols: CYP76G1   CYP76G1 (cytochrome P450, family 76, subfamily G, polypeptide 1); oxygen binding                 |
| jcvi_18314 | -0.031 moderately similar to (448)AT2G45510   Symbols: CYP704A2   CYP704A2 (cytochrome P450, family 704, subfamily A, polypeptide 2); oxygen binding          |
| ev166394   | -0.033 moderately similar to (443)AT5G57220   Symbols: CYP81F2   CYP81F2 (cytochrome P450, family 81, subfamily F, polypeptide 2); oxygen binding             |
| ev112982   | -0.034 moderately similar to (216)AT4G36220   Symbols: CYP84A1, FAH1   FAH1 (FERULATE-5-HYDROXYLASE 1); ferulate 5-hydroxylase                                |
| ee513955   | -0.035 weakly similar to (174)AT3G61040   Symbols: CYP76C7   CYP76C7 (cytochrome P450, family 76, subfamily C, polypeptide 7); oxygen binding                 |
| ee438184   | -0.035 moderately similar to (257)AT4G13310   Symbols: CYP71A20   CYP71A20 (cytochrome P450, family 71, subfamily A, polypeptide 20); oxygen binding          |
| jcvi_32462 | -0.036 moderately similar to (343)AT3G14650   Symbols: CYP72A11   CYP72A11 (cytochrome P450, family 72, subfamily A, polypeptide 11); oxygen binding          |
| jcvi_26026 | -0.037 moderately similar to (288)AT5G63450   Symbols: CYP94B1   CYP94B1 (cytochrome P450, family 94, subfamily B, polypeptide 1); oxygen binding             |
| jcvi_22136 | -0.038 highly similar to (839)AT3G50660   Symbols: CYP90B1, CLM, SNP2, DWF4   DWF4 (DWARF 4)                                                                  |
| ev034065   | -0.038 moderately similar to (259)AT2G23190   Symbols: CYP81D7   CYP81D7 (cytochrome P450, family 81, subfamily D, polypeptide 7); oxygen binding             |
| jcvi_37742 | -0.039 moderately similar to (206)AT1G65340   Symbols: CYP96A3   CYP96A3 (cytochrome P450, family 96, subfamily A, polypeptide 3); oxygen binding             |
| jcvi_8984  | -0.039 moderately similar to (332)AT4G27710   Symbols: CYP709B3   CYP709B3 (cytochrome P450, family 709, subfamily B, polypeptide 3); oxygen binding          |
| jcvi_39009 | -0.041 moderately similar to (288)AT5G63450   Symbols: CYP81K1   CYP81K1 (cytochrome P450, family 81, subfamily K, polypeptide 1); oxygen binding             |
| dn192274   | -0.041 moderately similar to (277)AT4G27710   Symbols: CYP709B3   CYP709B3 (cytochrome P450, family 709, subfamily B, polypeptide 3); oxygen binding          |
| jcvi_33491 | -0.041 highly similar to (629)AT5G25900   Symbols: CYP701A3, GA3   GA3 (GA REQUIRING 3); oxygen binding                                                       |
| ev216674   | -0.042 moderately similar to (327)AT3G48270   Symbols: CYP71A26   CYP71A26 (cytochrome P450, family 71, subfamily A, polypeptide 26); oxygen binding          |
| am062044   | -0.043 moderately similar to (295)AT4G27710   Symbols: CYP709B3   CYP709B3 (cytochrome P450, family 709, subfamily B, polypeptide 3); oxygen binding          |
| jcvi_5528  | -0.044 highly similar to (753)AT3G48300   Symbols: CYP71A23   CYP71A23 (cytochrome P450, family 71, subfamily A, polypeptide 23); oxygen binding              |
| jcvi_11758 | -0.045 moderately similar to (294)AT3G14610   Symbols: CYP72A7   CYP72A7 (cytochrome P450, family 72, subfamily A, polypeptide 7); oxygen binding             |
| jcvi_11410 | -0.045 moderately similar to (297)AT1G33720   Symbols: CYP76C6   CYP76C6 (cytochrome P450, family 76, subfamily C, polypeptide 6); oxygen binding             |
| ee473119   | -0.045 moderately similar to (206)AT2G46960   Symbols: CYP709B1   CYP709B1 (cytochrome P450, family 709, subfamily B, polypeptide 1); oxygen binding          |
| jcvi_24102 | -0.046 very weakly similar to (88.2)AT3G26290   Symbols: CYP71B26   CYP71B26 (cytochrome P450, family 71, subfamily B, polypeptide 26); oxygen binding        |
| jcvi_34056 | -0.046 moderately similar to (121)AT3G26280   Symbols: CYP71B4   CYP71B4 (cytochrome P450, family 71, subfamily B, polypeptide 4); oxygen binding             |
| jcvi_6241  | -0.048 highly similar to (521)AT4G37320   Symbols: CYP81D5   CYP81D5 (cytochrome P450, family 81, subfamily D, polypeptide 5); oxygen binding                 |
| ev060076   | -0.048 very weakly similar to (83.6)AT2G23220   Symbols: CYP81D6   CYP81D6 (cytochrome P450, family 81, subfamily D, polypeptide 6); oxygen binding           |
| ex112711   | -0.048 weakly similar to (118)AT3G14690   Symbols: CYP72A15   CYP72A15 (cytochrome P450, family 72, subfamily A, polypeptide 15); oxygen binding              |
| jcvi_22400 | -0.052 highly similar to (623)AT2G25160   Symbols: CYP82F1   CYP82F1 (cytochrome P450, family 82, subfamily F, polypeptide 1); oxygen binding                 |
| cx194361   | -0.052 highly similar to (190)AT1G13090   Symbols: CYP71B28   CYP71B28 (cytochrome P450, family 71, subfamily B, polypeptide 28); oxygen binding              |
| jcvi_4889  | -0.053 highly similar to (757)AT4G32170   Symbols: CYP96A2   CYP96A2 (cytochrome P450, family 96, subfamily A, polypeptide 2); oxygen binding                 |
| jcvi_42596 | -0.053 moderately similar to (418)AT2G23190   Symbols: CYP81D7   CYP81D7 (cytochrome P450, family 81, subfamily D, polypeptide 7); oxygen binding             |
| jcvi_29816 | -0.053 moderately similar to (470)AT5G10610   Symbols: CYP81K1   CYP81K1 (cytochrome P450, family 81, subfamily K, polypeptide 1); oxygen binding             |
| jcvi_4637  | -0.054 moderately similar to (240)AT1G74540   Symbols: CYP98A8   CYP98A8 (cytochrome P450, family 98, subfamily A, polypeptide 8); oxygen binding             |
| jcvi_5513  | -0.054 highly similar to (881)AT2G40890   Symbols: CYP98A3   monoxygenase/ p-coumarate 3-hydroxylase                                                          |
| jcvi_33871 | -0.054 moderately similar to (277)AT2G45970   Symbols: LCR, CYP86A8   CYP86A8 (LACERATA); fatty acid (omega-1)-hydroxylase/ oxygen binding                    |
| ev121702   | -0.056 moderately similar to (390)AT4G31940   Symbols: CYP82C4   CYP82C4 (cytochrome P450, family 82, subfamily C, polypeptide 4); oxygen binding             |
| ex040060   | -0.059 moderately similar to (210)AT2G45570   Symbols: CYP76C2   CYP76C2 (cytochrome P450, family 76, subfamily C, polypeptide 2); oxygen binding             |
| es269078   | -0.061 moderately similar to (213)AT4G19230   Symbols: CYP707A1   CYP707A1 (cytochrome P450, family 707, subfamily A, polypeptide 1); oxygen binding          |
| ex037042   | -0.062 moderately similar to (290)AT5G04660   Symbols: CYP77A4   CYP77A4 (cytochrome P450, family 77, subfamily A, polypeptide 4); oxygen binding             |
| es906436   | -0.062 moderately similar to (293)AT5G67310   Symbols: CYP81G1   CYP81G1 (cytochrome P450, family 81, subfamily G, polypeptide 1); oxygen binding             |
| cd834522   | -0.064 weakly similar to (185)AT4G15350   Symbols: CYP705A2   CYP705A2 (cytochrome P450, family 705, subfamily A, polypeptide 2); oxygen binding              |
| jcvi_14008 | -0.065 moderately similar to (227)AT5G63450   Symbols: CYP94B1   CYP94B1 (cytochrome P450, family 94, subfamily B, polypeptide 1); oxygen binding             |
| jcvi_14969 | -0.067 highly similar to (853)AT3G61880   Symbols: CYP78A9   CYP78A9 (CYTOCHROME P450 78A9); oxygen binding                                                   |
| jcvi_27964 | -0.068 moderately similar to (388)AT1G13090   Symbols: CYP71B28   CYP71B28 (cytochrome P450, family 71, subfamily B, polypeptide 28); oxygen binding          |
| jcvi_25515 | -0.069 moderately similar to (451)AT3G26125   Symbols: CYP86C2   CYP86C2 (cytochrome P450, family 86, subfamily C, polypeptide 2); oxygen binding             |
| 1B5832     | -0.071 weakly similar to (191)AT4G00360   Symbols: ATT1, CYP86A2   CYP86A2 (ABERRANT INDUCTION OF TYPE THREE GENES 1); oxygen binding                         |
| ev111587   | -0.072 weakly similar to (106)AT3G14630   Symbols: CYP72A9   CYP72A9 (cytochrome P450, family 72, subfamily A, polypeptide 9); oxygen binding                 |
| ev153072   | -0.074 weakly similar to (150)AT2G45580   Symbols: CYP76C3   CYP76C3 (cytochrome P450, family 76, subfamily C, polypeptide 3); oxygen binding                 |
| jcvi_24362 | -0.074 moderately similar to (311)AT3G20130   Symbols: CYP705A22   CYP705A22 (cytochrome P450, family 705, subfamily A, polypeptide 22)                       |
| jcvi_42512 | -0.075 moderately similar to (328)AT2G27690   Symbols: CYP94C1   CYP94C1 (cytochrome P450, family 94, subfamily C, polypeptide 1); oxygen binding             |
| jcvi_32427 | -0.076 moderately similar to (360)AT1G13100   Symbols: CYP71B29   CYP71B29 (cytochrome P450, family 71, subfamily B, polypeptide 29); oxygen binding          |
| jcvi_16369 | -0.081 highly similar to (550)AT4G15396   Symbols: CYP702A6   heme binding / iron ion binding / monoxygenase                                                  |
| 1B3212     | -0.083 weakly similar to (128)AT1G13150   Symbols: CYP86C4   CYP86C4 (cytochrome P450, family 86, subfamily C, polypeptide 4); oxygen binding                 |
| jcvi_18440 | -0.083 moderately similar to (288)AT3G26280   Symbols: CYP71B4   CYP71B4 (cytochrome P450, family 71, subfamily B, polypeptide 4); oxygen binding             |
| am395066   | -0.083 weakly similar to (114)AT5G24960   Symbols: CYP71A14   CYP71A14 (cytochrome P450, family 71, subfamily A, polypeptide 14); oxygen binding              |
| jcvi_20366 | -0.083 moderately similar to (229)AT1G13080   Symbols: CYP71B2   CYP71B2 (CYTOCHROME P450 71B2); oxygen binding                                               |
| jcvi_31546 | -0.087 moderately similar to (398)AT4G37410   Symbols: CYP81F4   CYP81F4 (cytochrome P450, family 81, subfamily F, polypeptide 4); oxygen binding             |
| jcvi_8810  | -0.090 moderately similar to (218)AT2G45510   Symbols: CYP704A2   CYP704A2 (cytochrome P450, family 704, subfamily A, polypeptide 2); oxygen binding          |
| jcvi_15265 | -0.094 moderately similar to (342)AT2G42250   Symbols: CYP712A1   CYP712A1 (cytochrome P450, family 712, subfamily A, polypeptide 1); oxygen binding          |
| cd829521   | -0.095 moderately similar to (201)AT3G48310   Symbols: CYP71A22   CYP71A22 (cytochrome P450, family 71, subfamily A, polypeptide 22); oxygen binding          |
| jcvi_36324 | -0.095 moderately similar to (334)AT4G15396   Symbols: CYP702A6   heme binding / iron ion binding / monoxygenase                                              |
| es993338   | -0.097 weakly similar to (189)AT3G28740   Symbols: CYP81D1   cytochrome P450 family protein                                                                   |
| ev114804   | -0.097 moderately similar to (374)AT3G26330   Symbols: CYP71B37   CYP71B37 (cytochrome P450, family 71, subfamily B, polypeptide 37); oxygen binding          |
| jcvi_39819 | -0.101 moderately similar to (232)AT3G48270   Symbols: CYP71A26   CYP71A26 (cytochrome P450, family 71, subfamily A, polypeptide 26); oxygen binding          |
| jcvi_22517 | -0.103 moderately similar to (275)AT4G00360   Symbols: ATT1, CYP86A2   CYP86A2 (ABERRANT INDUCTION OF TYPE THREE GENES 1); oxygen binding                     |
| jcvi_37321 | -0.104 moderately similar to (428)AT5G67310   Symbols: CYP81G1   CYP81G1 (cytochrome P450, family 81, subfamily G, polypeptide 1); oxygen binding             |
| cd826995   | -0.104 moderately similar to (280)AT2G25160   Symbols: CYP82F1   CYP82F1 (cytochrome P450, family 82, subfamily F, polypeptide 1); oxygen binding             |
| jcvi_18323 | -0.106 moderately similar to (305)AT1G65670   Symbols: CYP702A1   CYTOCHROME P450, FAMILY 702, SUBFAMILY A, POLYPEPTIDE 1; oxygen binding                     |
| ev080390   | -0.108 moderately similar to (260)AT3G28740   Symbols: CYP81D1   cytochrome P450 family protein                                                               |
| ee531205   | -0.109 weakly similar to (123)AT3G50660   Symbols: CYP90B1, CLM, SNP2, DWF4   DWF4 (DWARF 4)                                                                  |
| cd827796   | -0.110 weakly similar to (127)AT2G34500   Symbols: CYP710A1   cytochrome P450, family 710, subfamily A, polypeptide 1; C-22 sterol desaturase/ oxygen binding |
| ev177001   | -0.111 moderately similar to (315)AT1G17060   Symbols: SOB7, CYP72C1   CYP72C1 (cytochrome P450, family 72, subfamily C, polypeptide 1); oxygen binding       |
| jcvi_41772 | -0.112 highly similar to (528)AT1G17060   Symbols: SOB7, CYP72C1   CYP72C1 (cytochrome P450, family 72, subfamily C, polypeptide 1); oxygen binding           |
| jcvi_14270 | -0.113 moderately similar to (219)AT5G67310   Symbols: CYP81G1   CYP81G1 (cytochrome P450, family 81, subfamily G, polypeptide 1); oxygen binding             |
| jcvi_20371 | -0.117 moderately similar to (338)AT1G13150   Symbols: CYP86C4   CYP86C4 (cytochrome P450, family 86, subfamily C, polypeptide 4); oxygen binding             |
| es968427   | -0.124 very weakly similar to (99.0)AT4G13310   Symbols: CYP71A20   CYP71A20 (cytochrome P450, family 71, subfamily A, polypeptide 20); oxygen binding        |
| jcvi_10179 | -0.124 moderately similar to (271)AT4G36220   Symbols: CYP84A1, FAH1   FAH1 (FERULATE-5-HYDROXYLASE 1); ferulate 5-hydroxylase                                |
| jcvi_34973 | -0.128 moderately similar to (384)AT1G65340   Symbols: CYP96A3   CYP96A3 (cytochrome P450, family 96, subfamily A, polypeptide 3); oxygen binding             |
| jcvi_8386  | -0.134 moderately similar to (324)AT5G04660   Symbols: CYP77A4   CYP77A4 (cytochrome P450, family 77, subfamily A, polypeptide 4); oxygen binding             |
| ev000620   | -0.136 moderately similar to (353)AT3G14630   Symbols: CYP72A9   CYP72A9 (cytochrome P450, family 72, subfamily A, polypeptide 9); oxygen binding             |
| jcvi_14187 | -0.137 moderately similar to (401)AT1G01280   Symbols: CYP703A2   NADH or NADPH as one donor, and incorporation of one atom of oxygen / oxygen binding        |
| jcvi_29378 | -0.139 moderately similar to (244)AT2G45510   Symbols: CYP704A2   CYP704A2 (cytochrome P450, family 704, subfamily A, polypeptide 2); oxygen binding          |
| dy080836   | -0.140 weakly similar to (200)AT3G14630   Symbols: CYP72A9   CYP72A9 (cytochrome P450, family 72, subfamily A, polypeptide 9); oxygen binding                 |
| jcvi_32592 | -0.141 moderately similar to (294)AT2G46960   Symbols: CYP709B1   CYP709B1 (cytochrome P450, family 709, subfamily B, polypeptide 1); oxygen binding          |
| ev160116   | -0.146 moderately similar to (247)AT1G11600   Symbols: CYP77B1   CYP77B1 (cytochrome P450, family 77, subfamily B, polypeptide 1); oxygen binding             |
| es901345   | -0.146 moderately similar to (257)AT4G37320   Symbols: CYP81D5   CYP81D5 (cytochrome P450, family 81, subfamily D, polypeptide 5); oxygen binding             |
| jcvi_5352  | -0.148 moderately similar to (209)AT3G14640   Symbols: CYP72A10   CYP72A10 (cytochrome P450, family 72, subfamily A, polypeptide 10); oxygen binding          |
| jcvi_32582 | -0.150 moderately similar to (320)AT3G26300   Symbols: CYP71B34   CYP71B34 (cytochrome P450, family 71, subfamily B, polypeptide 34); oxygen binding          |
| ex025947   | -0.150 weakly similar to (142)AT5G58860   Symbols: CYP86, CYP86A1   CYP86A1 (cytochrome P450, family 86, subfamily A, polypeptide 1); oxygen binding          |
| jcvi_14975 | -0.154 moderately similar to (263)AT4G37410   Symbols: CYP71A4   CYP71A4 (cytochrome P450, family 81, subfamily F, polypeptide 4); oxygen binding             |
| dn961931   | -0.156 moderately similar to (369)AT2G45510   Symbols: CYP704A2   CYP704A2 (cytochrome P450, family 704, subfamily A, polypeptide 2); oxygen binding          |
| es981427   | -0.157 moderately similar to (234)AT3G50660   Symbols: CYP90B1, CLM, SNP2, DWF4   DWF4 (DWARF 4)                                                              |
| jcvi_26799 | -0.160 moderately similar to (389)AT4G13770   Symbols: REF2, CYP83A1   CYP83A1 (CYTOCHROME P450 83A1); oxygen binding                                         |
| ev202871   | -0.162 weakly similar to (104)AT1G01190   Symbols: CYP78A8   CYP78A8 (cytochrome P450, family 78, subfamily A, polypeptide 8); oxygen binding                 |
| jcvi_13980 | -0.162 highly similar to (507)AT2G30490   Symbols: ATC4H, C4H, CYP73A5   trans-cinnamate 4-monoxygenase                                                       |
| jcvi_18074 | -0.163 moderately similar to (303)AT2G45970   Symbols: LCR, CYP86A8   CYP86A8 (LACERATA); fatty acid (omega-1)-hydroxylase/ oxygen binding                    |
| jcvi_621   | -0.166 moderately similar to (377)AT3G53280   Symbols: CYP71B5   CYP71B5 (CYTOCHROME P450 71B5); oxygen binding                                               |
| jcvi_12445 | -0.166 moderately similar to (409)AT5G25140   Symbols: CYP71B13   CYP71B13 (cytochrome P450, family 71, subfamily B, polypeptide 13); oxygen binding          |
| jcvi_9357  | -0.166 highly similar to (541)AT2G40890   Symbols: CYP98A3   monoxygenase/ p-coumarate 3-hydroxylase                                                          |

|            |        |                                        |                                                                                                            |
|------------|--------|----------------------------------------|------------------------------------------------------------------------------------------------------------|
| jcvi_13380 | -0.167 | moderately similar to (352)AT5G58860   | Symbols: CYP86, CYP86A1   CYP86A1 (cytochrome P450, family 86, subfamily A, polypeptide 1); oxygen binding |
| jcvi_9799  | -0.171 | moderately similar to (435)AT3G26160   | Symbols: CYP71B17   CYP71B17 (cytochrome P450, family 71, subfamily B, polypeptide 17); oxygen binding     |
| ev155336   | -0.172 | moderately similar to (417)AT2G23180   | Symbols: CYP96A1   CYP96A1 (cytochrome P450, family 96, subfamily A, polypeptide 1); oxygen binding        |
| cd836219   | -0.173 | moderately similar to (306)AT4G27710   | Symbols: CYP709B3   CYP709B3 (cytochrome P450, family 709, subfamily B, polypeptide 3); oxygen binding     |
| jcvi_15282 | -0.176 | moderately similar to (493)AT5G07990   | Symbols: CYP75B1, D501, TT7   TT7 (TRANSPARENT TESTA 7); flavonoid 3'-monooxygenase/ oxygen binding        |
| jcvi_17170 | -0.176 | weakly similar to (138)AT5G36220       | Symbols: CYP91A1, CYP81D1   CYP81D1 (CYTOCHROME P450 91A1); oxygen binding                                 |
| cd828252   | -0.180 | weakly similar to (148)AT3G14610       | Symbols: CYP72A7   CYP72A7 (cytochrome P450, family 72, subfamily A, polypeptide 7); oxygen binding        |
| ev100862   | -0.184 | very weakly similar to (85.9)AT1G57750 | Symbols: MAH1, CYP96A15   CYP96A15/MAH1 (MID-CHAIN ALKANE HYDROXYLASE 1)                                   |
| ev020283   | -0.188 | moderately similar to (425)AT3G50660   | Symbols: CYP90B1, CLM, SNP2, DWF4   DWF4 (DWARF 4)                                                         |
| jcvi_13111 | -0.188 | moderately similar to (492)AT5G58860   | Symbols: CYP86, CYP86A1   CYP86A1 (cytochrome P450, family 86, subfamily A, polypeptide 1); oxygen binding |
| jcvi_7861  | -0.190 | moderately similar to (339)AT1G13110   | Symbols: CYP71B7   CYP71B7 (cytochrome P450, family 71, subfamily B, polypeptide 7); oxygen binding        |
| jcvi_10859 | -0.192 | very weakly similar to (100)AT1G11600  | Symbols: CYP77B1   CYP77B1 (cytochrome P450, family 77, subfamily B, polypeptide 1); oxygen binding        |
| jcvi_7322  | -0.193 | moderately similar to (249)AT3G26125   | Symbols: CYP86C2   CYP86C2 (cytochrome P450, family 86, subfamily C, polypeptide 2); oxygen binding        |
| jcvi_23363 | -0.196 | weakly similar to (166)AT1G57750       | Symbols: MAH1, CYP96A15   CYP96A15/MAH1 (MID-CHAIN ALKANE HYDROXYLASE 1)                                   |
| jcvi_8135  | -0.201 | moderately similar to (355)AT5G10600   | Symbols: CYP81K2   CYP81K2 (cytochrome P450, family 81, subfamily K, polypeptide 2); oxygen binding        |
| ex056678   | -0.205 | moderately similar to (339)AT3G14690   | Symbols: CYP72A15   CYP72A15 (cytochrome P450, family 72, subfamily A, polypeptide 15); oxygen binding     |
| jcvi_20750 | -0.205 | moderately similar to (396)AT2G30490   | Symbols: ATCAH, C4H, CYP73A5   trans-cinnamate 4-monooxygenase                                             |
| jcvi_33397 | -0.227 | moderately similar to (251)AT5G44620   | Symbols: CYP706A3   CYP706A3 (cytochrome P450, family 706, subfamily A, polypeptide 3); oxygen binding     |
| jcvi_17488 | -0.228 | moderately similar to (401)AT1G28430   | Symbols: CYP705A24   CYP705A24 (cytochrome P450, family 705, subfamily A, polypeptide 24); oxygen binding  |
| jcvi_7608  | -0.231 | moderately similar to (424)AT1G13110   | Symbols: CYP71B7   CYP71B7 (cytochrome P450, family 71, subfamily B, polypeptide 7); oxygen binding        |
| jcvi_29231 | -0.234 | moderately similar to (366)AT5G63450   | Symbols: CYP94B1   CYP94B1 (cytochrome P450, family 94, subfamily B, polypeptide 1); oxygen binding        |
| jcvi_8862  | -0.234 | moderately similar to (289)AT1G13710   | Symbols: CYP78A5   CYP78A5 (cytochrome P450, family 78, subfamily A, polypeptide 5); oxygen binding        |
| jcvi_14088 | -0.236 | moderately similar to (392)AT3G14690   | Symbols: CYP72A15   CYP72A15 (cytochrome P450, family 72, subfamily A, polypeptide 15); oxygen binding     |
| ex093564   | -0.241 | moderately similar to (426)AT2G45550   | Symbols: MAH1, CYP76C4   CYP76C4 (cytochrome P450, family 76, subfamily C, polypeptide 4); oxygen binding  |
| jcvi_24285 | -0.246 | highly similar to (784)AT5G04660       | Symbols: CYP77A4   CYP77A4 (cytochrome P450, family 77, subfamily A, polypeptide 4); oxygen binding        |
| jcvi_4902  | -0.247 | moderately similar to (350)AT1G17060   | Symbols: SOB7, CYP72C1   CYP72C1 (cytochrome P450, family 72, subfamily C, polypeptide 1); oxygen binding  |
| jcvi_30653 | -0.248 | moderately similar to (396)AT1G33720   | Symbols: CYP76C6   CYP76C6 (cytochrome P450, family 76, subfamily C, polypeptide 6); oxygen binding        |
| jcvi_29438 | -0.249 | weakly similar to (160)AT3G14680       | Symbols: CYP72A14   CYP72A14 (cytochrome P450, family 72, subfamily A, polypeptide 14); oxygen binding     |
| jcvi_38332 | -0.254 | moderately similar to (274)AT5G09970   | Symbols: CYP78A7   CYP78A7 (cytochrome P450, family 78, subfamily A, polypeptide 7); oxygen binding        |
| jcvi_21570 | -0.257 | moderately similar to (201)AT1G13080   | Symbols: CYP71B2   CYP71B2 (CYTOCHROME P450 71B2); oxygen binding                                          |
| ex140353   | -0.258 | weakly similar to (171)AT3G26280       | Symbols: CYP71B4   CYP71B4 (cytochrome P450, family 71, subfamily B, polypeptide 4); oxygen binding        |
| jcvi_1712  | -0.262 | moderately similar to (313)AT3G26210   | Symbols: CYP71B23   CYP71B23 (cytochrome P450, family 71, subfamily B, polypeptide 23); oxygen binding     |
| jcvi_9360  | -0.263 | moderately similar to (231)AT2G40890   | Symbols: CYP98A3   monoxygenase/ p-coumarate 3-hydroxylase                                                 |
| jcvi_32769 | -0.271 | moderately similar to (353)AT1G13100   | Symbols: CYP71B29   CYP71B29 (cytochrome P450, family 71, subfamily B, polypeptide 29); oxygen binding     |
| jcvi_23144 | -0.275 | moderately similar to (202)AT1G13080   | Symbols: CYP71B2   CYP71B2 (CYTOCHROME P450 71B2); oxygen binding                                          |
| jcvi_10372 | -0.287 | moderately similar to (273)AT1G13080   | Symbols: CYP71B2   CYP71B2 (CYTOCHROME P450 71B2); oxygen binding                                          |
| jcvi_25804 | -0.292 | moderately similar to (338)AT1G13090   | Symbols: CYP71B28   CYP71B28 (cytochrome P450, family 71, subfamily B, polypeptide 28); oxygen binding     |
| es930162   | -0.292 | weakly similar to (122)AT4G15110       | Symbols: CYP97B3   CYP97B3 (cytochrome P450, family 97, subfamily B, polypeptide 3); oxygen binding        |
| jcvi_34518 | -0.292 | highly similar to (665)AT3G14690       | Symbols: CYP72A15   CYP72A15 (cytochrome P450, family 72, subfamily A, polypeptide 15); oxygen binding     |
| ev173169   | -0.293 | moderately similar to (281)AT3G28740   | Symbols: CYP81D1   cytochrome P450 family protein                                                          |
| jcvi_13077 | -0.300 | highly similar to (766)AT3G14610       | Symbols: CYP72A7   CYP72A7 (cytochrome P450, family 72, subfamily A, polypeptide 7); oxygen binding        |
| jcvi_13339 | -0.304 | moderately similar to (437)AT2G29090   | Symbols: CYP707A2   CYP707A2 (cytochrome P450, family 707, subfamily A, polypeptide 2); oxygen binding     |
| jcvi_18541 | -0.307 | highly similar to (504)AT1G13710       | Symbols: CYP78A5   CYP78A5 (cytochrome P450, family 78, subfamily A, polypeptide 5); oxygen binding        |
| jcvi_4653  | -0.315 | moderately similar to (218)AT5G36220   | Symbols: CYP91A1, CYP81D1   CYP81D1 (CYTOCHROME P450 91A1); oxygen binding                                 |
| es900791   | -0.318 | moderately similar to (449)AT1G19630   | Symbols: CYP722A1   CYP722A1 (cytochrome P450, family 722, subfamily A, polypeptide 1); oxygen binding     |
| ex039068   | -0.319 | weakly similar to (110)AT4G31500       | Symbols: SUR2, RNT1, RED1, ATR4, CYP83B1   CYTOCHROME P450 MONOOXYGENASE 83B1; oxygen binding              |
| amb06073   | -0.322 | moderately similar to (260)AT5G63450   | Symbols: CYP94B1   CYP94B1 (cytochrome P450, family 94, subfamily B, polypeptide 1); oxygen binding        |
| jcvi_8488  | -0.331 | moderately similar to (394)AT3G14690   | Symbols: CYP72A15   CYP72A15 (cytochrome P450, family 72, subfamily A, polypeptide 15); oxygen binding     |
| jcvi_38880 | -0.334 | highly similar to (818)AT4G12300       | Symbols: CYP706A4   CYP706A4 (cytochrome P450, family 706, subfamily A, polypeptide 4); oxygen binding     |
| ex045165   | -0.346 | moderately similar to (206)AT3G03470   | Symbols: CYP89A9   CYP89A9 (cytochrome P450, family 89, subfamily A, polypeptide 9); oxygen binding        |
| jcvi_2172  | -0.351 | moderately similar to (379)AT3G14680   | Symbols: CYP72A14   CYP72A14 (cytochrome P450, family 72, subfamily A, polypeptide 14); oxygen binding     |
| ev216094   | -0.356 | moderately similar to (308)AT3G14690   | Symbols: CYP72A15   CYP72A15 (cytochrome P450, family 72, subfamily A, polypeptide 15); oxygen binding     |
| ev116895   | -0.358 | moderately similar to (336)AT3G53280   | Symbols: CYP71B5   CYP71B5 (CYTOCHROME P450 71B5); oxygen binding                                          |
| ev170929   | -0.365 | moderately similar to (292)AT3G28740   | Symbols: CYP81D1   cytochrome P450 family protein                                                          |
| jcvi_25728 | -0.368 | moderately similar to (470)AT4G37330   | Symbols: CYP81D4   CYP81D4 (cytochrome P450, family 81, subfamily D, polypeptide 4); oxygen binding        |
| ev110073   | -0.370 | weakly similar to (111)AT1G66540       | Symbols:   cytochrome P450, putative                                                                       |
| jcvi_21065 | -0.411 | highly similar to (521)AT1G13080       | Symbols: CYP71B2   CYP71B2 (CYTOCHROME P450 71B2); oxygen binding                                          |
| ex134057   | -0.416 | highly similar to (509)AT1G73340       | Symbols:   oxygen binding                                                                                  |
| jcvi_16598 | -0.419 | moderately similar to (466)AT4G00360   | Symbols: ATT1, CYP86A2   CYP86A2 (ABERRANT INDUCTION OF TYPE THREE GENES 1); oxygen binding                |
| jcvi_9641  | -0.428 | moderately similar to (395)AT2G12190   | Symbols:   cytochrome P450, putative                                                                       |
| ex081446   | -0.434 | weakly similar to (106)AT5G52320       | Symbols: CYP96A4   CYP96A4 (cytochrome P450, family 96, subfamily A, polypeptide 4); oxygen binding        |
| ev102803   | -0.448 | moderately similar to (226)AT4G12310   | Symbols: CYP706A5   CYP706A5 (cytochrome P450, family 706, subfamily A, polypeptide 5); oxygen binding     |
| eh422740   | -0.458 | moderately similar to (240)AT3G56630   | Symbols: CYP94D2   CYP94D2 (cytochrome P450, family 94, subfamily D, polypeptide 2); oxygen binding        |
| jcvi_16255 | -0.478 | weakly similar to (157)AT3G03470       | Symbols: CYP89A9   CYP89A9 (cytochrome P450, family 89, subfamily A, polypeptide 9); oxygen binding        |
| jcvi_36307 | -0.503 | very weakly similar to (87.8)AT1G13800 | Symbols: CYP97A3, LUT5   carotene beta-ring hydroxylase/ oxygen binding                                    |
| jcvi_5919  | -0.507 | moderately similar to (381)AT2G26710   | Symbols: BAS1, CYP734A1   PHYB ACTIVATION TAGGED SUPPRESSOR 1; oxygen binding / steroid hydroxylase        |
| jcvi_18790 | -0.527 | moderately similar to (342)AT3G14680   | Symbols: CYP72A14   CYP72A14 (cytochrome P450, family 72, subfamily A, polypeptide 14); oxygen binding     |
| jcvi_30048 | -0.544 | moderately similar to (273)AT2G46660   | Symbols: CYP78A6   CYP78A6 (cytochrome P450, family 78, subfamily A, polypeptide 6); oxygen binding        |
| jcvi_4988  | -0.546 | moderately similar to (372)AT4G12320   | Symbols: CYP706A6   CYP706A6 (cytochrome P450, family 706, subfamily A, polypeptide 6); oxygen binding     |
| jcvi_17705 | -0.556 | moderately similar to (474)AT4G12300   | Symbols: CYP706A4   CYP706A4 (cytochrome P450, family 706, subfamily A, polypeptide 4); oxygen binding     |
| ex077007   | -0.556 | moderately similar to (217)AT4G36380   | Symbols: ROT3   ROT3 (ROTUNDIFOLIA 3); oxygen binding / steroid hydroxylase                                |
| ex098535   | -0.562 | moderately similar to (393)AT3G28740   | Symbols: CYP81D1   cytochrome P450 family protein                                                          |
| ev173184   | -0.576 | weakly similar to (135)AT3G14680       | Symbols: CYP72A14   CYP72A14 (cytochrome P450, family 72, subfamily A, polypeptide 14); oxygen binding     |
| ee557855   | -0.578 | moderately similar to (326)AT1G74110   | Symbols: CYP78A10   CYP78A10 (cytochrome P450, family 78, subfamily A, polypeptide 10); oxygen binding     |
| jcvi_26571 | -0.612 | highly similar to (770)AT2G26170       | Symbols: MAX1, CYP711A1   CYP711A1 (MORE AXILLARY BRANCHES 1); oxygen binding                              |
| jcvi_39927 | -0.615 | moderately similar to (460)AT1G11600   | Symbols: CYP77B1   CYP77B1 (cytochrome P450, family 77, subfamily B, polypeptide 1); oxygen binding        |
| jcvi_4773  | -0.618 | moderately similar to (324)AT3G26290   | Symbols: CYP71B26   CYP71B26 (cytochrome P450, family 71, subfamily B, polypeptide 26); oxygen binding     |
| jcvi_16089 | -0.627 | moderately similar to (248)AT3G20080   | Symbols: CYP705A15   CYP705A15 (cytochrome P450, family 705, subfamily A, polypeptide 15); oxygen binding  |
| jcvi_14772 | -0.631 | moderately similar to (228)AT5G67310   | Symbols: CYP81G1   CYP81G1 (cytochrome P450, family 81, subfamily G, polypeptide 1); oxygen binding        |
| eh419222   | -0.634 | very weakly similar to (87.4)AT4G12300 | Symbols: CYP706A4   CYP706A4 (cytochrome P450, family 706, subfamily A, polypeptide 4); oxygen binding     |
| jcvi_14153 | -0.638 | moderately similar to (280)AT4G12300   | Symbols: CYP706A4   CYP706A4 (cytochrome P450, family 706, subfamily A, polypeptide 4); oxygen binding     |
| ev152526   | -0.639 | moderately similar to (385)AT2G23180   | Symbols: CYP96A1   CYP96A1 (cytochrome P450, family 96, subfamily A, polypeptide 1); oxygen binding        |
| cd835093   | -0.642 | very weakly similar to (100)AT3G20960  | Symbols: CYP705A33   CYP705A33 (cytochrome P450, family 705, subfamily A, polypeptide 33); oxygen binding  |
| jcvi_12612 | -0.649 | moderately similar to (204)AT4G37400   | Symbols: CYP81F3   CYP81F3 (cytochrome P450, family 81, subfamily F, polypeptide 3); oxygen binding        |
| jcvi_5112  | -0.652 | moderately similar to (392)AT4G13770   | Symbols: REF2, CYP83A1   CYP83A1 (CYTOCHROME P450 83A1); oxygen binding                                    |
| jcvi_34378 | -0.674 | moderately similar to (398)AT5G09970   | Symbols: CYP78A7   CYP78A7 (cytochrome P450, family 78, subfamily A, polypeptide 7); oxygen binding        |
| jcvi_30128 | -0.678 | moderately similar to (446)AT2G32440   | Symbols: CYP88A4, KAO2   KAO2 (ENT-KAUROIC ACID HYDROXYLASE 2); oxygen binding                             |
| jcvi_20204 | -0.678 | weakly similar to (163)AT1G13710       | Symbols: CYP78A5   CYP78A5 (cytochrome P450, family 78, subfamily A, polypeptide 5); oxygen binding        |
| jcvi_26408 | -0.689 | moderately similar to (410)AT5G36220   | Symbols: CYP91A1, CYP81D1   CYP81D1 (CYTOCHROME P450 91A1); oxygen binding                                 |
| ev041638   | -0.746 | moderately similar to (313)AT3G26220   | Symbols: CYP71B3   CYP71B3 (cytochrome P450, family 71, subfamily B, polypeptide 3); oxygen binding        |
| jcvi_23713 | -0.748 | highly similar to (593)AT1G13710       | Symbols: CYP78A5   CYP78A5 (cytochrome P450, family 78, subfamily A, polypeptide 5); oxygen binding        |
| jcvi_8225  | -0.798 | moderately similar to (440)AT3G26290   | Symbols: CYP71B26   CYP71B26 (cytochrome P450, family 71, subfamily B, polypeptide 26); oxygen binding     |
| jcvi_42506 | -0.817 | moderately similar to (391)AT3G14620   | Symbols: CYP72A8   CYP72A8 (cytochrome P450, family 72, subfamily A, polypeptide 8); oxygen binding        |
| jcvi_8990  | -0.848 | moderately similar to (422)AT5G36220   | Symbols: CYP91A1, CYP81D1   CYP81D1 (CYTOCHROME P450 91A1); oxygen binding                                 |
| jcvi_7226  | -0.851 | moderately similar to (355)AT1G13080   | Symbols: CYP71B2   CYP71B2 (CYTOCHROME P450 71B2); oxygen binding                                          |
| jcvi_17335 | -0.970 | moderately similar to (28)AT1G16410    | Symbols: BUS1, SP51, CYP79F1   CYP79F1 (SUPERSHOOT 1)                                                      |
| jcvi_7931  | -0.999 | moderately similar to (439)AT4G39480   | Symbols: CYP96A9   CYP96A9 (cytochrome P450, family 96, subfamily A, polypeptide 9); oxygen binding        |
| jcvi_10139 | -1.144 | moderately similar to (304)AT4G39490   | Symbols: CYP96A10   heme binding / iron ion binding / monooxygenase                                        |
| jcvi_14499 | -1.152 | highly similar to (961)AT1G01600       | Symbols: CYP86A4   CYP86A4 (cytochrome P450, family 86, subfamily A, polypeptide 4); oxygen binding        |
| jcvi_30402 | -1.155 | highly similar to (629)AT3G19270       | Symbols: CYP707A4   CYP707A4 (cytochrome P450, family 707, subfamily A, polypeptide 4); oxygen binding     |
| jcvi_13878 | -1.318 | moderately similar to (466)AT5G45340   | Symbols: CYP707A3   CYP707A3 (cytochrome P450, family 707, subfamily A, polypeptide 3); oxygen binding     |

|             |                                                                                                                                                       |
|-------------|-------------------------------------------------------------------------------------------------------------------------------------------------------|
| jcv_i_14519 | -1.669 highly similar to ( 871)AT5G45340   Symbols: CYP707A3   CYP707A3 (cytochrome P450, family 707, subfamily A, polypeptide 3); oxygen binding     |
| jcv_i_18210 | -1.693 highly similar to ( 807)AT3G48520   Symbols: CYP94B3   CYP94B3 (cytochrome P450, family 94, subfamily B, polypeptide 3); oxygen binding        |
| jcv_i_20042 | -2.246 moderately similar to ( 349)AT5G45340   Symbols: CYP707A3   CYP707A3 (cytochrome P450, family 707, subfamily A, polypeptide 3); oxygen binding |
